# 1 ***Analysis of the Immune Response to Sciatic Nerve Injury Identifies Efferocytosis as*** 2 ***a Key Mechanism of Nerve Debridement***

3  
4 Ashley L. Kalinski<sup>1\*</sup>, Choya Yoon<sup>1\*</sup>, Lucas D. Huffman<sup>1,3\*</sup>, Patrick C. Duncker<sup>2\*</sup>, Rafi Kohen<sup>1,3</sup>, Ryan  
5 Passino<sup>1</sup>, Hannah Hafner<sup>1</sup>, Craig Johnson<sup>1</sup>, Riki Kawaguchi<sup>4</sup>, Kevin S. Carbajal<sup>2</sup>, Juan Sebastián  
6 Jara<sup>5</sup>, Edmund Hollis<sup>5,6</sup>, Daniel H. Geschwind<sup>4</sup>, Benjamin M. Segal<sup>7,8</sup>, and Roman J. Giger<sup>1,2,3#</sup>

7  
8 <sup>1</sup>Department of Cell and Developmental Biology, <sup>2</sup>Department of Neurology, <sup>3</sup>Neuroscience Graduate  
9 Program, University of Michigan Medical School, Ann Arbor, MI 48109-2200. <sup>4</sup>Program in Neurogenetics,  
10 Department of Neurology, David Geffen School of Medicine, University of California, Los Angeles, Los  
11 Angeles, CA 90095, USA. <sup>5</sup>Burke Neurological Institute, White Plains, NY 10605. <sup>6</sup>The Feil Family Brain  
12 and Mind Research Institute, Weill Cornell Medicine, New York, NY 10065. <sup>7</sup>Department of Neurology,  
13 The Ohio State University Wexner Medical Center, Columbus, OH 43210, <sup>8</sup>The Neurological Institute, The  
14 Ohio State University.

15  
16 \* these authors contributed equally to the study

17  
18 # corresponding author:  
19 Roman J. Giger,  
20 University of Michigan School of Medicine  
21 109 Zina Pitcher  
22 Ann Arbor, MI 48109  
23 E-mail: [rgiger@umich.edu](mailto:rgiger@umich.edu)  
24

## 25 **Abstract**

26 Sciatic nerve crush injury triggers sterile inflammation within the distal nerve and axotomized dorsal  
27 root ganglia (DRGs). Granulocytes and pro-inflammatory Ly6C<sup>high</sup> monocytes infiltrate the nerve first,  
28 and rapidly give way to Ly6C<sup>negative</sup> inflammation-resolving macrophages. In axotomized DRGs, few  
29 hematogenous leukocytes are detected and resident macrophages acquire a ramified morphology.  
30 Single-cell RNA-sequencing of injured sciatic nerve identifies five macrophage subpopulations, repair  
31 Schwann cells, and mesenchymal precursor cells. Macrophages at the nerve crush site are  
32 molecularly distinct from macrophages associated with Wallerian degeneration. In the injured nerve,  
33 macrophages “eat” apoptotic leukocytes, a process called efferocytosis, and thereby promote an anti-  
34 inflammatory milieu. Myeloid cells in the injured nerve, but not axotomized DRGs, strongly express  
35 receptors for the cytokine GM-CSF. In GM-CSF deficient (*Csf2<sup>-/-</sup>*) mice, inflammation resolution is  
36 delayed and conditioning-lesion induced regeneration of DRG neuron central axons is abolished.  
37 Thus, carefully orchestrated inflammation resolution in the nerve is required for conditioning-lesion  
38 induced neurorepair.

39

## 10 Introduction

11 In the injured adult mammalian CNS, the regenerative capacity of severed axons is very limited.  
12 However, regeneration of dorsal column axons in the rodent spinal cord can be augmented if  
13 preceded by a conditioning lesion to the sciatic nerve (McQuarrie et al., 1977; Neumann and Woolf,  
14 1999; Richardson and Issa, 1984). This seminal observation has been exploited extensively to  
15 identify mechanisms that promote axon regeneration (Abe and Cavalli, 2008; Blesch et al., 2012;  
16 Chandran et al., 2016). Traumatic PNS injury leads to sterile inflammation at the site of injury and  
17 within the distal nerve stump where axons undergo Wallerian degeneration (Kim and Moalem-Taylor,  
18 2011; Perry et al., 1987). In addition, a remote inflammatory response is observed in axotomized  
19 dorsal root ganglia (DRGs) (Hu and McLachlan, 2003; Lu and Richardson, 1991) and the lumbar  
20 spinal cord (Guan et al., 2016; Hu et al., 2007; Zhang et al., 2007). The innate arm of the immune  
21 system is important for peripheral nerve regeneration, as well as conditioning lesion induced dorsal  
22 column axon regeneration (Kwon et al., 2015; Niemi et al., 2013; Salegio et al., 2011; Zigmond and  
23 Echevarria, 2019). Very recent studies employed single cell RNA sequencing (scRNA-seq) to  
24 describe gene expression in naïve and injured peripheral nervous tissue at cellular resolution (Wang  
25 et al., 2020; Wolbert et al., 2020; Ydens et al., 2020). A systematic analysis of immune cell profiles  
26 within the injured sciatic nerve and axotomized DRGs, however, has not yet been carried out.

27 The sciatic nerve trunk is covered by the epineurium, a protective connective tissue sheath  
28 that harbors fibroblasts, macrophages, and blood vessels. The more delicate perineurium covers  
29 nerve bundles and the endoneurium is a tube-like structure wrapped around individual myelinated  
30 fibers. The endoneurium contains macrophages and fibroblast-like mesenchymal cells (MES) (Carr et  
31 al., 2019; Ydens et al., 2020). Following PNS injury, Schwann cells (SC) reprogram into repair cells  
32 and together with MES and nerve-resident macrophages produce chemokines and cytokines to  
33 promote entry of hematogenous immune cells (Arthur-Farraj et al., 2012; Muller et al., 2010; Richard  
34 et al., 2012; Ydens et al., 2020). Repair SC, together with innate immune cells, contribute to nerve  
35 debridement, formation of new blood vessels, and release of growth promoting molecules, thereby  
36 creating a microenvironment conducive for long-distance axon regeneration and tissue repair  
37 (Barrette et al., 2008; Clements et al., 2017; DeFrancesco-Lisowitz et al., 2015; Hoke et al., 2000;  
38 Martini et al., 2008). Despite recent progress, it remains unclear which cell types in the injured nerve  
39 contribute to tissue debridement and there is a paucity in our understanding of the underlying  
40 molecular mechanisms (Brosius Lutz et al., 2017; Klein and Martini, 2016).

41 Sciatic nerve injury leads to a remote and strong cell body response in axotomized DRG  
42 neurons (Chandran et al., 2016). This includes induction of neuron-intrinsic growth programs,  
43 neuronal release of cytokines and chemokines, activation of intra-ganglionic tissue resident  
44 macrophages, immune-like glia, and entry of hematogenous leukocytes (Cafferty et al., 2004;

75 McLachlan and Hu, 2014; Richardson and Lu, 1994; Richardson et al., 2009; Wang et al., 2018;  
76 Zigmond and Echevarria, 2019). Experimentally induced intra-ganglionic inflammation, triggered by  
77 injection of *C. parvum* bacteria into DRGs, increases axon regeneration following dorsal root injury  
78 (Lu and Richardson, 1991). Intra-ganglionic expression of recombinant CCL2 leads to increased  
79 macrophage staining, enhanced DRG neuron outgrowth *in vitro* (Niemi et al., 2016), and regeneration  
80 of DRG neuron central projections following spinal cord injury (Kwon et al., 2015).

81 Here we employed a combination of flow cytometry, mouse reporter lines, and  
82 immunofluorescence labeling to describe the leukocyte composition in the injured sciatic nerve and  
83 axotomized DRGs. We used parabiosis to show that upon sciatic nerve crush injury (SNC), the origin,  
84 magnitude, and cellular composition of immune cell profiles is very different between the nerve and  
85 DRGs. For a comparative analysis, we carried out bulk RNA sequencing of DRGs and single cell  
86 RNA sequencing (scRNA-seq) of injured nerves. We report the cellular make up, cell-type specific  
87 gene expression profiles, and lineage trajectories in the regenerating mouse PNS. Computational  
88 analysis revealed cell-type specific expression of engulfment receptors and bridging molecules  
89 important for eating of apoptotic cell corpses, a process called efferocytosis (Henson, 2017). We  
90 show that within the injured nerve, monocytes (Mo) and macrophages (Mac) eat apoptotic leukocytes,  
91 and thus, contribute to inflammation resolution. Strikingly, Mac at the nerve injury site are molecularly  
92 distinct from Mac in the distal nerve stump. *Csf2ra* and *Csf2rb*, obligatory components of the GM-CSF  
93 receptor (Hansen et al., 2008), are strongly expressed by myeloid cells in the injured nerve, but not in  
94 axotomized DRGs. Functional studies with *Csf2*<sup>-/-</sup> mice, deficient for GM-CSF, show that this cytokine  
95 regulates the inflammatory milieu in the injured nerve and is important for conditioning lesion elicited  
96 dorsal column axon regeneration. Taken together, our work provides novel insights into a rich and  
97 dynamic landscape of injury-associated cell states, and underscores the importance of properly  
98 orchestrated inflammation resolution in the nerve for neural repair.

99

## 00 Results

### 01 Quantitative analysis of immune cell profiles in the injured sciatic nerve

02 Despite recent advances in our understanding of PNS injury-induced inflammation, a comparative  
03 analysis of the leukocyte subtypes within the injured sciatic nerve and axotomized DRGs does not yet  
04 exist. For identification and quantification of immune cell profiles at different post-injury time points,  
05 adult mice were subjected to a mid-thigh sciatic nerve crush (SNC) injury. SNC leads to axon  
06 transection, but preserves the surrounding epineurium (**Figure 1A**). Flow cytometry was used to  
07 assess the composition of injury-mobilized immune cell profiles in the nerve and DRGs (**Figure 1 –**  
08 **figure supplement 1**). To minimize sample contamination with circulating leukocytes, mice were  
09 perfused with physiological saline prior to tissue collection. The nerve trunk was harvested and  
10 divided into a proximal and distal segment. The distal segment included the injury site together with  
11 the distal nerve stump (**Figure 1A**). For comparison, the corresponding tissues from naïve mice were  
12 collected. In naïve mice, ~300 live leukocytes (CD45<sup>+</sup>) are detected within a ~5 mm nerve segment.  
13 At day 1 following SNC (d1), the number of CD45<sup>+</sup> cells in the distal nerve increases sharply, peaks  
14 around 23,100± 180 cells at d3, and declines at d7 (**Figure 1B**). Further analysis shows that  
15 granulocytes (GC), identified as CD45<sup>+</sup>CD11b<sup>+</sup>Ly6G<sup>+</sup>CD11c<sup>-</sup> cells, are absent from naïve nerve, but  
16 increase to 7,800± 300 at d1. By d3, the number of GC dropped below 1,000 (**Figure 1C**). A robust  
17 and prolonged increase of the Mo/Mac population (CD45<sup>+</sup>CD11b<sup>+</sup>Ly6G<sup>-</sup>CD11c<sup>-</sup>) is observed,  
18 reaching 7,300± 120 cells at d1, peaking around 13,200± 240 at d3, and declining to 3,200± 90 at d7  
19 (**Figure 1D**). Monocyte-derived dendritic cells (MoDC), identified as CD45<sup>+</sup>CD11b<sup>+</sup>Ly6G<sup>-</sup>CD11c<sup>+</sup> cells,  
20 increase more gradually. They are sparse at d1, reach 1,100± 30 at d3, and 3,400± 60 at d7 (**Figure**  
21 **1E**). Few CD11b<sup>-</sup> conventional DC (cDC), identified as CD45<sup>+</sup>CD11b<sup>-</sup>Ly6G<sup>-</sup>CD11c<sup>+</sup> cells, are present  
22 at d1 and d3 and increase to 600± 20 cells at d7 (**Figure 1F**). The total number of lymphocytes  
23 (CD45<sup>+</sup>CD11b<sup>-</sup>CD11c<sup>-</sup>Ly6G<sup>-</sup>) is low, but significantly elevated at d1, d3, and d7 post-SNC (**Figure**  
24 **1G, 1H**). In marked contrast to the distal nerve stump, flow cytometry of the proximal nerve stump  
25 shows that SNC does not significantly alter immune cells number or composition (**Figure 1 – figure**  
26 **supplement 2A-K**). The sharp divide in myeloid cell distribution within the injured nerve is readily  
27 seen in longitudinal sections stained with anti-F4/80 (**Figure 1 – figure supplement 2L**). The distal  
28 nerve stump was identified by anti-GFAP staining, a protein upregulated in repair Schwann cells  
29 (**Figure 1 – figure supplement 2L**). In sum, SNC-elicited inflammation in the nerve is confined to the  
30 crush site and the distal nerve stump where severed fibers undergo rapid Wallerian degeneration. GC  
31 increase sharply and peak within 24h, followed by Mo/Mac, MoDC, and few lymphocytes.

32  
33  
34

## 35 **Quantitative analysis of immune cell profiles in axotomized DRGs**

36 Immunofluorescence staining of DRG sections shows that SNC causes a transient increase in Iba1  
37 and F4/80 immunolabeling, peaking around d3 and declining at d7 (**Figure 2A**). Flow cytometric  
38 analysis of DRGs from naive mice identifies on average ~600 live leukocytes per ganglion, including  
39 GC, Mo/Mac, MoDC, cDC, and lymphocytes (**Figure 2B-2G**). At d1, no significant change in intra-  
40 ganglionic immune cell profiles is observed. At d3, there is a ~2-fold increase in leukocytes, however  
41 a significant increase is only observed for Mo/Mac (**Figure 2C**). At d7, the Mo/Mac population is  
42 significantly reduced compared to d3. The MoDC and cDC populations are elevated at d7 when  
43 compared to DRGs from naïve mice (**Figure 2D, 2E**). Lymphocytes are present in naïve DRGs but do  
44 not significantly increase during the first week post-SNC (**Figure 2F, 2G**). The presence of CD3<sup>+</sup> T  
45 cells in DRGs was validated by immunofluorescence labeling of L5 DRG sections (**Figure 2 – figure**  
46 **supplement 1**). For an independent assessment of the kinetics and magnitude of SNC induced  
47 inflammation in the nerve trunk and DRGs, we used Western blotting to carry out a 3-week time-  
48 course analysis. Probing tissue lysates with anti-CD11b shows that the injury induced increase in  
49 myeloid cells in the nerve trunk exceeds the one in axotomized DRGs by an order of magnitude  
50 (**Figure 2H, 2I**). Taken together, these studies show that SNC induces a remote immune response in  
51 axotomized DRGs that is strikingly different in intensity and cellular composition from injured nerve  
52 tissue.

## 54 **Sciatic nerve injury triggers massive infiltration of immune cells into the injured nerve, but not** 55 **axotomized DRGs**

56 Endoneurial Mac in the sciatic nerve and DRGs respond to injury (Mueller et al., 2003; Muller et al.,  
57 2010), however, there are no reliable cell surface markers to distinguish between tissue resident and  
58 injury mobilized hematogenous immune cells that enter the nerve or axotomized DRGs. To examine  
59 cell origin, we employed parabiosis, that is conjoined wildtype (WT) and tdTomato (tdTom) reporter  
60 mice that share blood circulation. We chose parabiosis over bone marrow transplantation because of  
61 potential confounding effects caused by irradiation (Guimaraes et al., 2019). One month after  
62 parabiosis surgery, both parabionts were subjected to unilateral SNC. Sciatic nerves, DRGs, and  
63 spinal cords were harvested at different post-injury time points (**Figure 3A**). Shared blood circulation  
64 was assessed by flow cytometry of the spleen, and revealed a myeloid cell (CD45<sup>+</sup>CD11b<sup>+</sup>)  
65 chimerism of 27.3± 1.5 (**Figure 3 – figure supplement 1**). At d3 following SNC, flow cytometric  
66 analysis of nerves isolated from WT parabionts identifies 28.4± 6.7% tdTom<sup>+</sup> myeloid (CD45<sup>+</sup>CD11b<sup>+</sup>)  
67 cells (**Figure 3B**). Fractionation of myeloid cells into Mo/Mac (CD45<sup>+</sup>CD11b<sup>+</sup>Ly6G<sup>-</sup>CD11c<sup>-</sup>) and  
68 MoDC (CD45<sup>+</sup>CD11b<sup>+</sup>Ly6G<sup>-</sup>CD11c<sup>+</sup>) further revealed that 27.1± 6.9% of Mo/Mac and 30± 5.6% of  
69 MoDC are tdTom<sup>+</sup> in the injured WT parabiont (**Figure 3C**). When coupled with ~30% chimerism

(**Figure 3 – figure supplement 1C**), this suggests that blood-borne cells make up the vast majority of immune cells in the injured nerve. Histological analysis of injured nerves from WT parabionts identified numerous tdTom<sup>+</sup> cells (**Figure 3D**). During the first 24h, tdTom<sup>+</sup> cells are confined to the injury site (data not shown). At d3 and d7, tdTom<sup>+</sup> cells are preferentially found at the injury site but also within the distal nerve stump where fibers undergo Wallerian degeneration (**Figure 3D and Figure 6 – figure supplement 2C**). In the proximal nerve, very few tdTom<sup>+</sup> cells are detected at any post-SNC time point (**Figure 3D**). A two-week time course analysis of axotomized DRGs harvested from WT parabionts identified a modest and transient increase of tdTom<sup>+</sup> cells (**Figure 3E**). DRG sections from naïve mice revealed that the number of tdTom<sup>+</sup> cells per field-of-view (4,000  $\mu\text{m}^2$ ) is very low. Following SNC, there is a modest, but statistically significant increase in tdTom<sup>+</sup> cells at d3 and d7, but not at 14d, suggesting that only a small number of hematogenous leukocytes enter axotomized DRGs (**Figure 3F**). Together these studies show that SNC-elicited intra-ganglionic inflammation primarily occurs through mechanisms that involve DRG-resident macrophages, rather than hematogenous immune cells. Of note, during the first two weeks post-SNC, no tdTom<sup>+</sup> cells were detected in the lumbar spinal cord (data not shown), suggesting that hematogenous immune cells do not significantly contribute to SNC triggered spinal cord inflammation.

### **Sciatic nerve injury triggers macrophage morphological changes in axotomized DRGs**

In tissue sections of axotomized DRGs, there is a rapid increase in Iba1 and F4/80 immunoreactive profiles (**Figure 2A**), yet in parabiotic mice the number of blood-derived tdTom<sup>+</sup> immune cells in axotomized DRGs is very modest (**Figure 3E, 3F**). This raises questions regarding the underlying cellular basis. Previous studies reported that upon sciatic nerve injury, DRG resident Mac undergo limited proliferation (Leonhard et al., 2002; Yu et al., 2020). For an independent assessment, axotomized DRGs were subjected to whole-mount immunofluorescence labeling with anti-Iba1 (**Figure 3G**). Three-dimensional projection analysis of Mac, in the absence of nerve injury (intact) and at 3d post-SNC, revealed a 2.3-fold increase in the total volume occupied by Iba1<sup>+</sup> cells (**Figure 3I**). Two distinct macrophage morphologies were observed in intact DRGs, a majority (84 $\pm$  2%) of amoeboid cells and a smaller population (16 $\pm$  2%) of elongated cells (**Figure 3H, 3J**). Unexpectedly, SNC triggers Mac morphological changes in axotomized DRGs (**Figure 3H**). Many Iba1<sup>+</sup> cells acquire a more complex, stellate morphology and exhibit enveloping extensions. At d3, Mac with amoeboid (60 $\pm$  2%), elongated (10 $\pm$  3%), and stellate morphologies (30 $\pm$  4%) are identified. And at d7, amoeboid (40 $\pm$  3%), elongated (5 $\pm$  1%), and stellate (55 $\pm$  4%) shaped Mac are detected (**Figure 3J**). The SNC-triggered morphological changes do not alter the average volume of individual macrophages (**Figure 3K**). This suggests that local proliferation, together with Mac morphological

changes contribute to increased Iba1 immunoreactivity in axotomized DRGs, while infiltration of blood-borne myeloid cells plays a minor role.

### Construction of immune associated co-expression networks in axotomized DRGs

To gain insights into SNC-triggered genome wide transcriptional changes in DRGs, we carried out bulk RNA sequencing of ganglia harvested from naïve, d1, d3, and d7 injured mice. To understand the modular network structure associated with peripheral axotomy, we carried out weighted gene co-expression network analysis (WGCNA) at different post-injury time points (Geschwind and Konopka, 2009; Zhang and Horvath, 2005). WGCNA permits identification of modules of highly co-expressed genes that likely function together. Focusing on prominently regulated gene modules, we find a previously described module (pink module (Chandran et al., 2016)), enriched for regeneration associated gene (RAG) products, including *Jun*, *Fos*, *Stat3*, *Smad1*, *Atf3*, among other genes. In addition, WGCNA identifies a large turquoise module (**Figure 4A, 4B**), which along with the pink module, is stably upregulated following SNC (**Figure 4 – figure supplement 1A, 1B**). To annotate module function, we applied gene ontology (GO) enrichment analyses, which showed enrichment (Benjamini-corrected p values < 0.05) for several GO categories associated with immune system function in the turquoise module. The enrichment plot for GO regulation shows a strong upregulation for *immune system processes* (**Figure 4C**). The most significantly upregulated GO terms include *cell activation*, *immune effector process*, and *defense response* (**Figure 4 – figure supplement 1C**). Ingenuity pathway analysis (IPA) identified several upstream activators, including cytokines and growth factors (IFN $\gamma$ , TNF, IL1 $\beta$ , IL6, TGF $\beta$ 1, IL10, IL4, IFN $\beta$ 1, IL2) and the transcription regulators STAT1, STAT3, IRF7, RELA (**Figure 4 – figure supplement 1D**). The upregulation of immune system processes in axotomized DRGs correlates with a modest ~1.5-fold increase of gene products encoding the canonical macrophage markers *Itgam* (CD11b), *Aif1* (Iba1), and *Adgre1* (F4/80) (**Figure 4D-4F**). In comparison, expression levels and fold-upregulation of *Atf3*, *Jun*, and *Stat3* are very robust (**Figure 4G-4I**). Expression of the chemokine receptor *Ccr2* and the receptor subunits for the GM-CSF receptor (*Csf2ra* and *Csf2rb*) are elevated in axotomized DRGs, however expression levels are low, especially for *Csf2rb* (~1 fpkm) (**Figure 4J-4L**). Moreover, some of the immune gene activity observed in axotomized DRGs may involve non-hematopoietic cells. Collectively, RNA-seq provides independent evidence that SNC triggers a remote inflammatory response in DRGs, however this does not result in a massive increase in transcripts encoding canonical Mac markers. This conclusion is consistent with flow cytometry (**Figure 2B-2G**), Western blot analysis (**Figure 2H, 2I**), and 3D reconstruction of Mac (**Figure 3G-3K**) in axotomized DRGs.

### The cellular landscape of injured peripheral nerve tissue



To de-convolute the cellular complexity of injured sciatic nerve tissue in an unbiased manner, we applied scRNA-seq to capture the transcriptional landscape at single cell resolution. Because injury-induced expansion of the immune compartment peaks around d3 (**Figure 1B**), we chose this time point to dissect and process whole nerves for single cell capture, using the 10x Genomics platform. A total of 17,384 cells was sequenced with 16,204 used for downstream analysis after removing cells with fewer than 200 genes, more than 7,500, or mitochondrial content greater than 25%. Median unique genes per cell was 2,507. More than 20 different cell clusters were identified using shared nearest neighbor clustering algorithm. Results are visualized using Uniform Manifold Approximation and Projection (UMAP) for dimension reduction (**Figure 5A**). The top 100 genes enriched in each cluster (**Figure 5 – source data 1**) were used to assign cluster specific cell identities. Most prominently featured are immune cells, identified by their strong expression of *Ptprc* (encoding CD45). Innate immune cells (*Itgam/CD11b*) make up a median 42.22% ( $\pm 1.39\%$ ), and lymphocytes less than 1.73% ( $\pm .27\%$ ), of the cells in the injured nerve (**Figure 5B, 5C**). Other abundantly featured cell types include mesenchymal progenitor cells (MES). We identify 3 distinct MES subpopulations (**Figure 5A**), reminiscent of a recent study examining the nerve response to digit tip amputation (Carr et al., 2019). In the injured sciatic nerve, MES make up 18.49% ( $\pm .98\%$ ) of cells and differentially express the markers *Pdfgra* and *Sox9* (**Figure 5D, 5E**). MES are a rich source of extracellular matrix (ECM) molecules, including collagens (*Col1a*, *Col3a*, *Col5a*, *Col6a*), *Fn1*/fibronectin, *Fbn1*/fibrillin-1, *Lamb2*/aminin-b2, and numerous proteoglycans (**Figure 5 – figure supplement 1A**). Individual MES clusters are identified as perineural MES (pMES) (*Slc2a1*/Glut1, *Itgb4*/Integrin- $\beta$ 4, *Stra6*/stimulated by retinoic acid 6, *Sfrp5*/secreted frizzled related protein 5), endoneurial MES (eMES) (*Wif1*/Wnt inhibitory factor 1, *Bmp7*), and differentiating MES (dMES) (*Gas1*/Growth arrest-specific 1, *Ly6a*/SCA-1, *Tnc*/tenascin, *Sfrp1*/secreted frizzled-related protein 1). Cluster dMES is fused to a small population of fibroblasts (Fb) (**Figure 5A**). STRING Reactome pathway analysis for MES clusters identifies *extracellular matrix organization* as top hit (**Figure 5 - figure supplement 2**). Based on gene expression, cells in eMES, but not in clusters pMES and dMES, are neural crest derived (Carr et al., 2019; Gugala et al., 2018).

Three clusters of Schwann cells (SC1-3) represent 17.48% ( $\pm 1.53\%$ ) of cells in the injured nerve (**Figure 5A**). Cluster SC1 contains proliferating cells marked by *Mki67* expression (**Figure 5J**) and many cells that strongly express *Ncam1*, *Chl1*/cell adhesion molecule L1-like, *ErbB3*, *Epha5*, *Thbs2*/thrombospondin-2, *Tnc*, *Hbegf*, and the BMP antagonist *Sostdc1* (**Figure 5F and Figure 5 – figure supplement 3, Figure 5 – source data 1**). SC1 enriched transcription factors (SC1-TF) include *Zfp706*, *Tead1*, *Sox6*, *Nr2f1*/COUP-TF (**Figure 5K**). SC3 cells express high levels of *Ngfr/p75*, *Nrcam*, *Gfra1*/GDNF family receptor alpha 1, *Btc*/betacellulin, *Gjb1*/connexin-32, *Cryab*/crystallin alpha B, *Tnfrsf12a*/Fn14, *Gadd45b* (**Figure 5G and Figure 5 – figure supplement 3,**

74 **Figure 5 – source data 1).** SC3-TF include *Sox4*, *Runx2*, *Hmga1*, *Jun*, and the POU family member  
75 *Pou3f1*, a repressor of BMP and Wnt signaling, associated with a pro-myelinating cell state (**Figure**  
76 **5K**). Cluster SC2, flanked by SC1 and SC3, expresses *nes/nestin* and *Cryab*. UMAP splits the  
77 SC2 cluster and places a subset of cells near MES cells, likely because of relatively higher  
78 expression in ECM encoding genes (*Bgn*, *Dcn*, and *Fn1*) compared to clusters SC1 and SC3. SC2  
79 cells have a median 584 ( $\pm 22$ ) genes per cell and may have a higher degree of technical variation.  
80 STRING identified *axon guidance* and *integrin cell surface interactions* as top REACTOME pathways  
81 for SC1. *Axon guidance*, *gap junction assembly*, and *microtubule-dependent trafficking* are top hits for  
82 SC3 (**Figure 5 – figure supplement 3**).

83 Cells associated with the nerve vasculature make up 14.2% ( $\pm 3.19\%$ ). They include three  
84 clusters of endothelial cells (EC1-3), strongly expressing *Pecam/CD31*, representing 9.92% ( $\pm 2.69\%$ )  
85 of cells (**Figure 5H and Figure 5 – figure supplement 4**). There are two pericyte cell clusters (PC1  
86 and PC2) enriched for the pericyte markers (*Pdgfrb*, *Rgs5*) and vasculature-associated smooth  
87 muscle cells (*Acta2*, *Des*, *Myl9*, *Mylk*), representing 4.2% ( $\pm .44\%$ ) (**Figure 5I and Figure 5 – figure**  
88 **supplement 5**). A small cluster of chondrocyte-like cells (CL: *Comp/cartilage oligomeric matrix*  
89 *protein*, *Col27a1*, *Jun*) represents 0.5% ( $\pm 0.44\%$ ). A cell cluster (3.09% ( $\pm 1.08\%$ )), designated Hyb,  
90 harbors few erythrocytes (*Hba*, *Hbb*) and some cell hybrids (Hyb). These cells had a median 521 ( $\pm$   
91 27) expressed genes which was the lowest of any cell cluster and no clear identity could be assigned  
92 (**Figure 5B**).

93 Of relevance for neuronal regeneration, ECM components and numerous extracellular  
94 molecules known to regulate axon growth and regeneration are expressed by different cell types in  
95 the injured nerve (**Figure 5 – figure supplement 1A**). MES and Fb are rich sources of gene products  
96 with neurotrophic and neurotropic properties, and thus may act in a paracrine fashion to regulate  
97 neuronal survival and direct axonal growth (**Figure 5 – figure supplement 1B**). dMES express (*Igf1*,  
98 *Ogn/osteoglycin*, *Nid1/Nidogen-1*, *Ntn1/netrin*, *Postn/periostin*, *Gdf10/BMP3b*, *Cxcl12/SDF1*,  
99 *Dcn/decorin*, *Grn/progranulin*, *Sparc/osteonectin*, *lamb2/laminin-b2*, *Serpinf1*), eMES (*Spp1*, *Dcn*,  
100 *Nid1/nidogen-1*, *Sparc*, *Serpine2*, *Lum/lumican*, *Gpc3/glypican-3*), and pMES (*Ntn1*, *Cldn1/claudin-*  
101 *1*, *Efnb2/ephrin-b2*, *Mdk/midkine*, *Nid1*, *Sdc4/syndecan-4*, *Thbs4/thrombospondin-4*, *Gpc3*). Repair  
102 Schwann cells in clusters SC1 and SC3 express high levels of cytokine receptor like factor 1 (*Crlf1*),  
103 and SC3 highly express cardiotrophin-like cytokine factor 1 (*Clcf1*). *Crlf1* and *Clcf1* are both members  
104 of the CNTF ligand family that signal through gp130. In addition, SC1 (*Chl1*, *Ncam1*, *Nrn1/neuritin-1*,  
105 *Ptn/pleiotrophin*, *Sema3e*, *Sema7a*, *Reln/reelin*), and SC3 (*Reln*, *Dag1/dystroglycan*, *Gdnf*, *Nrcam*,  
106 *Sema3b*) express numerous membrane-bound and soluble factors with known roles in axon growth  
107 and guidance. Subpopulations of myeloid cells exhibit high expression of the osteopontin-encoding  
108 gene, *Spp1* and progranulin (*Grn*), powerful neurite outgrowth promoting factors (**Figure 5 – figure**

09 **supplement 1B)** (Altmann et al., 2016; Wright et al., 2014). Taken together, scRNA-seq of injured  
10 nerve reveals that multiple cell types contribute to a large repertoire of extracellular molecules with  
11 neurotrophic and axon growth promoting properties.

## 14 **Mesenchymal cells in the injured nerve shape the inflammatory milieu**

15 Non-hematopoietic cells in the injured nerve, including structural cells such as MES and Fb, show  
16 high immune gene activity and likely play a major role in shaping the inflammatory milieu (**Figure 5 –**  
17 **figure supplement 6**). In comparison, repair SC exhibit low immune gene activity, suggesting they  
18 play a less important role in shaping nerve inflammation (**Figure 5 – figure supplement 6**). In the 3d  
19 injured nerve, eMES express several chemokines (*Ccl2*, *Ccl7*, *Ccl9*, *Ccl11/eotaxin*), *Mif*/macrophage  
20 migration inhibitory factor, *Spp1*, *Thbs4*/thrombospondin-4, and *Il33*. Cells in dMES express *Mif*, *Csf1*,  
21 *Cxcl14* and the complement components *C1s1*, *C1ra*, *C3*, *C4b*. Cells in pMES express *Ccl11*,  
22 *Cfh*/complement factor h, and *Thbs4*. In addition, MES likely contribute to wound healing and fibrosis,  
23 since they express several WNT pathway antagonists, including *Wfi1*, *Sfrp1*/secreted frizzled related  
24 protein 1, *Sfrp2*, *Sfrp4*, and *Sfrp5* (**Figure 5 – figure supplement 2 and Figure 5 – source data 1**).  
25 Of note, in the injured heart, blocking of WNT signaling is critical to limit fibrosis and to promote  
26 differentiation of Mo into Mac (Meyer et al., 2017).

## 28 **The immune repertoire of injured sciatic nerve**

29 The mononuclear phagocyte system (MPS) is comprised of Mo, Mac, and DC, cell types that are  
30 readily detected in the injured nerve by flow cytometry (**Figure 1**). UMAP, overlaid with Seurat-based  
31 clustering of scRNA-seq datasets, identified a connected continuum of 7 cell clusters in the MPS (Mo,  
32 Mac1-5, and MoDC), characterized by strong expression of *Itgam/CD11b* (**Figure 5C**) and various  
33 degrees of the commonly used myeloid cell markers *Adgre1/F4/80*, *Aif1/Iba1*, *Cd68*, *Cx3cr1* and  
34 *Cd209a/DC-SIGN* (**Figure 6A-6E**). Cells in the MPS strongly express the myeloid lineage-defining  
35 transcription factor PU.1 (*Spi1*). The C/EBP family member TF (*Cebpb*) is expressed by Mo/Mac, but  
36 not dendritic cells (**Figure 6F**). Myeloid cells are a rich source of fibronectin, extracellular proteases,  
37 and hydrolases (*Fn1*, *Tgfbi*, *Adam15*, *CtsC*, *CtsS*, *Gusb*) and likely play a major role in ECM  
38 remodeling, cell adhesion, and fibrosis. Monocytes strongly express *Ly6c2/Ly6C*, *Chil3*/chitinase-like  
39 3, *Ifitm6*/interferon-induced transmembrane protein 6, *Itgal*/integrin  $\alpha$ L, *Gsr*/glutathione reductase,  
40 *Hp*/haptoglobin (**Figure 6 – figure supplement 1**). In addition, they express the TFs *Hif1a*, *Trps1*,  
41 and *Cebpb*/C-EBP $\beta$ , a bZIP TF important for Mo survival (**Figure 6F**). In the UMAP plot, the Mo  
42 cluster is flanked by three macrophage subpopulations (Mac1-Mac3) (**Figure 5A**). Mac1 cells express  
43 (*Fcgr2b*/Fc gamma receptor 2b, *Arg1*/arginase-1, *Ltc4s*/leukotriene C4 synthase, *Lpl*/lipoprotein

lipase, *Camkk2*), Mac2 (*Cx3cr1*, *Ccr2*, *Csf1r*), and Mac3 (*Cx3cr1*, *Mrc1/CD206*, *Ccr2*, *Adgre1/F4/80*, *Csf1r*, *Cd38*) (**Figure 6 – figure supplement 1**). Of note, individual Mac subpopulations often co-express markers traditionally associated with M1-like and M2-like cells, indicating that these markers are of limited use to describe the more complex physiological states of Mac subpopulations in the injured nerve. Mac4 cells are characterized by high levels of *Trem2*/triggering receptor expressed on myeloid cells 2, *Arg1/arginase-1*, *Pf4/CXCL4*, *Stab1/stabilin-1*, *Cd68* (**Figure 6 – figure supplement 1**) and express the TFs *Cebpa*, *Mafb*, *Mef2a* (**Figure 6K**). Cluster Mac5 is small, 239 cells, and harbors dividing (*Mki67*) myeloid cells with “stem-like” features (*Stmn1/Stathmin-1*, *Top2a*, *Hmgb2*, *Tupp5*) (**Figure 5J, Figure 6 – figure supplement 1, Figure 5 – source data 1**). In addition, a smaller group of dividing cells (*Mki67*, *Top2a*) is embedded in the MPS and located between clusters Mac2 and MoDC (**Figure 6 – figure supplement 2A, 2B**). To distinguish between dividing nerve resident macrophages and dividing blood-derived myeloid cells, we subjected WT-tdTom parabionts to SNC (**Figure 3A**). At 3d post-SNC, WT nerves were analyzed for tdTom<sup>+</sup> cells that co-stain with anti-Ki67 and anti-F4/80 (**Figure 6 – figure supplement 2C**). TdTom<sup>+</sup>F4/80<sup>+</sup>Ki67<sup>+</sup> cells were identified, indicating that blood-borne, stem-like myeloid cells are present in the injured sciatic nerve. Mac2 cells express high levels of MHCII genes (*H2-Aa*, *H2-Ab1*, *H2-Eb1*, *M2-DM*) and the CD74 invariant chain of MHCII (*Cd74*), typically associated with antigen presentation to CD4<sup>+</sup> T cells. The MPS harbors monocyte-derived dendritic cells (MoDC), professional antigen presenting cells, characterized by high level expression of MHCII genes, *Itgax/CD11c*, *Itgb7/integrin-β7*, *Napsa/Napsin-A*, and *Cd209a/DC-SIGN* (**Figure 6E, Figure 6 – figure supplement 1**). Mac2 and MoDC express *Ciita* (**Figure 6F**), a class II transactivator, that promotes MHCII gene expression (Accolla et al., 2019). Few plasmacytoid DCs (pDC) (*Siglech*, *Ly6d*) and conventional DCs (cDC) (*Clec9a*, *Xcr1*, *Itgae*, *Tlr3*, *Ifi205*, *Cd24a*, *Btla/CD272*) are detected in the MPS (**Figure 6 – Figure supplement 2D, 2E**). cDC are enriched for the TFs *Batf3*, *Id2*, *Irf5*, *Irf8*, *Mycl*, *Srebf2* (**Figure 6F**). DC can readily be distinguished from other myeloid cells, based on their expression of *Bcl11a*, a TF that determines DC fate (Ippolito et al., 2014). Cells in the MoDC cluster show high expression of the TFs *Nfkb1*, *Pou2f2*, *Runx1*, *Rel/c-Rel*, and *Ikkkb/IKKβ* (**Figure 6F**). The GC cluster in the d3 nerve is small, 314 cells, and mainly includes neutrophils (*S100a8*, *S100a9*, *Ptgs2*, *Mmp9*, *Retnlg*), intermingled with few eosinophils (*Siglecf*) (**Figure 5A, Figure 6 – Figure supplement 1**). Overall, the Seurat cluster analysis is in good agreement with the abundance and identity of immune cell profiles detected by flow cytometry and also reveals the presence of a large and connected continuum of cell states in the myeloid compartment (**Figure 5A**). To infer the most probable differentiation trajectories from Mo toward their descendants, we used Slingshot, a method for pseudo-time trajectory analysis (Street et al., 2018). The analysis reveals a bifurcated trajectory and provides independent evidence that blood-borne Mo that enter the nerve where they give rise to

79 different Mac subpopulations as well as MoDC. The predicated differentiation trajectory indicates that  
80 Mo first give rise to Mac3, and cells in cluster Mac3 then differentiate either into Mac1, Mac2, or Mac4  
81 cells. Furthermore, Mac2 cells are predicted to differentiate into MoDC (**Figure 6 – figure**  
82 **supplement 3**).

83 The “connected continuum” of Mo/Mac in the injured nerve, as revealed by scRNA-seq, was  
84 independently verified by flow cytometry. The Mo/Mac population (CD45<sup>+</sup>CD11b<sup>+</sup>Ly6G<sup>-</sup>CD11c<sup>-</sup>) is  
85 highly plastic and can be subdivided based on surface levels of the lymphocyte antigen 6C (Ly6C).  
86 Ly6C is expressed at high levels on proinflammatory, circulating monocytes and is downregulated as  
87 they infiltrate tissues and mature into macrophages and dendritic cells (King et al., 2009). As  
88 expected, scRNA-seq of injured nerve shows that *Ly6c2*, the gene encoding Ly6C, is strongly  
89 expressed by Mo, but much less by Mac (**Figure 6G**). Flow cytometry shows that naïve nerve tissue  
90 harbors a small Mac population, mostly comprised of Ly6C<sup>-</sup> (70%) cells and few Ly6C<sup>int</sup> (16%) and  
91 Ly6C<sup>hi</sup> (14%) cells (**Figure 6H**). At d1 post-SNC, the number of Mo/Mac increases sharply and Ly6C  
92 distribution is skewed toward classically activated Ly6C<sup>hi</sup> cells (50%), with fewer Ly6C<sup>int</sup> (41%) and  
93 Ly6C<sup>-</sup> (9%) cells (**Figure 6I**). At d3, Ly6C<sup>hi</sup> (28%), Ly6C<sup>int</sup> (47%), and Ly6C<sup>-</sup> (25%) cells are detected  
94 (**Figure 6J**) and at d7, the majority of Mo/Mac are non-classical Ly6C<sup>-</sup> (65%) and intermediate Ly6C<sup>int</sup>  
95 (25%), with few Ly6C<sup>hi</sup> cells (10%) (**Figure 6K**). This shows that Ly6C<sup>hi</sup> Mo migrate into the injured  
96 nerve in large numbers and increase inflammation during the acute phase. Later, as nerve  
97 inflammation resolves, the Mo/Mac number and polarization gradually return back to pre-injury  
98 homeostatic levels (**Figure 6L, 6M**). Noteworthy, the Mo/Mac population in axotomized DRGs shows  
99 an opposite response with regard to surface Ly6C distribution. In naïve DRGs, it is comprised of  
100 Ly6C<sup>-</sup> (30%), Ly6C<sup>int</sup> (27%), and Ly6C<sup>hi</sup> (43%) cells. Upon SNC, the distribution shifts to 75%, 16%,  
101 and 9% on d1, to 53%, 20%, and 27% on d3, and 52%, 23%, and 25% on d7 (**Figure 6 – figure**  
102 **supplement 4**). Together, these data show that SNC triggered inflammation in the nerve is massive  
103 and characterized by a short pro-inflammatory phase that rapidly transitions to a resolving state. A  
104 similar immune response is not observed in axotomized DRGs.

### 105 **Identification of macrophage subpopulations with distinct functions and distribution patterns** 106 **in the injured nerve**

107 Mac subpopulations show overlapping, yet distinct, expression patterns of the canonical markers  
108 *Adgre1*(F4/80), *Aif1*(Iba1), *Cd68*, and *Cx3cr1* (**Figure 6A-6D**). Moreover, cells in Mac4 and some  
109 cells in clusters Mac1 and Mac3 express high levels of *Arg1*, while other Mac subpopulations do not  
110 (**Figure 6N**). To explore tissue distribution of *Arg1*<sup>+</sup> cells relative to F4/80<sup>+</sup> and CD68<sup>+</sup> cells in naïve  
111 and injured nerves, we subjected *Arg1-YFP* reporter mice to SNC. In naïve mice, no YFP<sup>+</sup> cells are  
112 observed (**Figure 6O**) while few F4/80<sup>+</sup> and CD68<sup>+</sup> are detected (**Figure 6 – Figure supplement 5**).

At d1, few YFP<sup>+</sup> cells accumulate near the injury site (data not shown) and at d3 many more are present (**Figure 6P**). Unexpectedly, YFP<sup>+</sup> cells are confined to the nerve crush site and largely absent from the distal nerve stump. This stands in contrast to F4/80<sup>+</sup> and CD68<sup>+</sup> macrophages, found at the injury site and the distal nerve (**Figure 6 – Figure supplement 5**). At d7, only few *Arg1*-YFP<sup>+</sup> cells are found at the injury site and none in the distal nerve stump (**Figure 6Q**). F4/80<sup>+</sup> Mac, on the other hand, are more uniformly distributed within the injury site and distal nerve stump (**Figure 6 – figure supplement 5**). This shows the existence of different immune compartments in the injured nerve. A subpopulation of *Arg1*<sup>+</sup> macrophages (including cells in cluster Mac4) is preferentially localized to the crush site, whereas F4/80<sup>+</sup> macrophages (including cells in cluster Mac2 and Mac3) are abundant in the distal nerve where fibers undergo Wallerian degeneration. Pathway analysis of cell clusters in the innate immune compartment reveals common functions in phagocytosis, phagosome, and endolysosomal digesting, but also highlights important differences (**Figure 6 – figure supplement 1**). KEGG pathways specific for Mo include *cytokine signaling* and *leukocyte trans-endothelial migration*, providing independent evidence for their hematogenous origin. Mo are highly plastic and predicted to give rise to monocyte-derived Mac subpopulations in the injured nerve (**Figure 6 – figure supplement 3**). Top KEGG pathways for Mac3 are *chemokine signaling pathway*, *complement and coagulation cascades*, and *cytokine-cytokine receptor interaction* (**Figure 6 – figure supplement 1**). For Mac1 cells, *complement and coagulation cascades*, suggesting that Mac1 and Mac3 play roles in opsonization and blocking of endoneurial bleeding. For Mac2 cells, KEGG pathway analysis identified *Leishmaniasis* and *Tuberculosis* as top hits (**Figure 6 – figure supplement 1**). For Mac4 cells, pathway analysis identified *negative regulation of immune system processes* and *cholesterol metabolism*. Cholesterol metabolism in Mac4 cells includes gene products that regulate reverse *cholesterol transport* (*Abca1*/ATP-binding cassette transporter, *Abcg1*, *Ctsd*/Cathepsin-D, *Ctsb*/Cathepsin-B), *cholesterol and lipid storage* (*Plin2*/perilipin), *formation of cholesterol esters* (*Soat1*), *cholesterol ester hydrolysis and lipoprotein metabolism* (*Lipa*/lipase-A, *Nceh1*/neutral cholesterol hydrolase 1, *ApoE*) and *intracellular cholesterol transport* (*Npc2*/Niemann-Pick C2 and *Scarb2*/scavenger receptor class B member 2) (**Figure 6 – figure supplement 6A-6I**). The abundance of gene products that protect from cholesterol overloading (Haidar et al., 2006; Viaud et al., 2018; Wu et al., 2018), suggests that this cluster is comprised of cholesterol laden cells. Importantly, tissue resident macrophages in naïve nerves (Wang et al., 2020), either do not express cholesterol regulatory gene products, or express them at significantly lower levels (**Figure 6 – figure supplement 6J-6S**).

## Cell type specific expression of engulfment receptors in the injured nerve

18 In the injured nerve, blood-borne phagocytes and repair SC collaborate in myelin removal. Repair SC  
19 use the receptor tyrosine kinases AXL and MerTK for myelin phagocytosis (Brosius Lutz et al., 2017).  
20 Clusters SC1 (*Axl<sup>hi</sup>*, *Mertk*) and SC3 (*Axl<sup>low</sup>*, *Mertk<sup>int</sup>*) exhibit differential expression of these two  
21 receptors (**Figure 7 – figure supplement 1**). Interestingly, *Axl* and *Mertk* expression in myeloid cells  
22 is very low, suggesting that innate immune cells and repair SC employ different mechanisms for  
23 myelin phagocytosis. Mac subclusters strongly express the myelin binding receptors *Lrp1* (low density  
24 lipoprotein receptor-related protein 1), *Pirb* (paired Ig-like receptor B), *Cd300lf* (sphingomyelin  
25 receptor), and several scavenger receptors (*Msr1*, *Cd36*, *Cd68*), including high levels of opsonic  
26 receptors (*Fcgr1*, *Fcgr3*, *Fcgr4*, *Fcer1g*) that may contribute to phagocytosis of antibody marked  
27 myelin debris (**Figure 7 – figure supplement 1 and Figure 5 – source data 1**) (Atwal et al., 2008;  
28 Grajchen et al., 2018; Izawa et al., 2014; Kuhlmann et al., 2002; Stiles et al., 2013). Compared to  
29 Mo/Mac of injured nerves, phagocytosis receptor expression is much lower in naïve nerve Mac  
30 (**Figure 7- figure supplement 1**).

31 In addition to debris phagocytosis, myeloid cells participate in removal of apoptotic cells (AC),  
32 primarily dying neutrophils and other leukocytes. Phagocytic uptake of AC, called efferocytosis, is  
33 mediated by a range of specialized engulfment receptors and mechanisms for ingestion (Boada-  
34 Romero et al., 2020). AC are selectively recognized due to phosphatidylserine (PS) or calreticulin  
35 (*Calr*) accumulation on their surface; both function as strong “eat me” signals (**Figure 7A**).  
36 Conversely, healthy cells display the “don’t eat me” signal CD47 that binds to the cell surface receptor  
37 SIRP $\alpha$  (signal regulatory protein  $\alpha$ ) encoded by *Sirpa*, to block efferocytosis (Kourtzelis et al., 2020).  
38 *Calr* and *Cd47* are broadly expressed by cells in the injured nerve, while *Sirpa* is largely confined to  
39 myeloid cells (**Figure 7B**). PS is directly recognized by cell surface receptors such as CD300 family  
40 members (*Cd300a*, *Cd300lb*, *Cd300lf*), stabilin-1 (*Stab1*), and oxidized-PS by the scavenger receptor  
41 *Cd36*, molecules that are expressed by phagocytes in the injured nerve (**Figure 7C**). Alternatively, PS  
42 binds indirectly, via bridging molecules, to engulfment receptors (Voss et al., 2015). Interestingly, in  
43 the injured sciatic nerve, numerous cell types express specific sets of bridging molecules, indicating  
44 that they may contribute in an autocrine or paracrine manner to AC removal. Bridging molecules  
45 prominently expressed include complement C1q components (*C1qa*, *C1qb*, *C1qc*, *C1ra*), annexins  
46 (*Anxa1-5*), pentraxin (*Ptx3*), thrombospondin 1 (*Thbs1*), collectin kidney protein 1 (*Colec11*), soluble  
47 collectin placenta 1 (*Colec12*), galectin-3/MAC-2 (*Lgals3*), growth arrest-specific 6 (*Gas6*), protein S  
48 (*Pros1*), milk fat globule-EGF factor 8 (*Mfge8*), and apolipoprotein E (*ApoE*) (**Figure 7B**). Bridging  
49 molecules that bind to PS are recognized by a large and diverse set of engulfment receptors on  
50 phagocytes, including *Lrp1*, *Trem2*, *Dap12* (*Tyrobp*), C1q receptor (*C1qr/Cd93*), C3a receptor 1  
51 (*C3ar1*), integrin  $\alpha$ M $\beta$ 2, (*Itgam*, *Itgb2*), integrin  $\alpha$ v (*Itgav*), integrin  $\beta$ 3 (*Itgb3*), CD14, and members of  
52 the scavenger receptor family (*Cd68* and *Msr1*/Mac scavenger receptor 1) (Doran et al., 2020; Erriah

et al., 2019; Korns et al., 2011). Strikingly, many of these engulfment receptors are expressed by myeloid cells, and are particularly abundant in Mac4 cells (**Figure 7C**). Indirect evidence that Mac4 cells eat AC corpses, is the strong expression of gene products that regulate lipid metabolism and mechanisms that protect cells from excessive cholesterol loading, such as reverse cholesterol transport and cholesterol esterification (**Figure 6 – figure supplement 6**). To assess whether expression of gene products involved in efferocytosis are upregulated following nerve injury, we took advantage of recently published scRNA-seq data sets generated from naïve mouse sciatic nerve tissue (Wang et al., 2020; Ydens et al., 2020). Importantly, bridging molecules and engulfment receptors are either not expressed by macrophages in the naïve nerve, or expressed at much lower levels than in Mac4 cells (**Figure 7 – figure supplement 2**).

### **Efferocytosis of leukocytes in the injured sciatic nerve**

To directly test whether efferocytosis takes place in the injured nerve, we first examined the presence of AC corpses. Viability-dye labeling, combined with flow cytometry, identified an increase in AC at d3 and d7 post-SNC (**Figure 7D**). During nerve debridement, degenerated nerve fibers and AC corpses are removed. In order to distinguish between efferocytosis of dying leukocytes and phagocytosis of nerve fiber debris, we generated WT<sup>CD45.1</sup>-tdTom<sup>CD45.2</sup> parabiotic mice (**Figure 7E**). Both mice in the parabiosis complex were subjected to bilateral SNC. At d3 post-SNC, live cells in the injured WT<sup>CD45.1</sup> nerve were analyzed by flow cytometry (**Figure 3 - figure supplement 1**). All tdTom<sup>+</sup> cells in the injured nerve of the WT<sup>CD45.1</sup> parabiont are blood-borne immune cells. Moreover, cells that are CD45.1<sup>+</sup>tdTom<sup>+</sup>CD45.2<sup>-</sup> represent tdTom<sup>+</sup> leukocytes that were eaten in the nerve by CD45.1<sup>+</sup> phagocytes. In non-parabiotic (single) tdTom mice, ~95% of myeloid cells (CD11b<sup>+</sup>) in the 3d injured nerve are tdTom<sup>+</sup> (**Figure 7F**) and in the WT<sup>CD45.1</sup> parabiont ~39% are CD11b<sup>+</sup>tdTom<sup>+</sup> (**Figure 7G**). Importantly, in the WT<sup>CD45.1</sup> parabiont, CD45.1<sup>+</sup>tdTom<sup>+</sup>CD45.2<sup>-</sup> (Q3) cells are readily detected in the injured nerve and such cells are not present in tdTom (single) mice (**Figure 7H, 7I**). This indicates that efferocytosis of apoptotic leukocytes takes place in the injured nerve. To determine which immune cell types eat apoptotic leukocytes, we analyzed CD45.1<sup>+</sup>tdTom<sup>+</sup> cells for surface levels of Ly6C and CD11c to distinguish between maturing Mo/Mac (Ly6C<sup>hi</sup> to Ly6C<sup>-</sup>) and MoDC (CD11c<sup>+</sup>). Mo/Mac have the biggest appetite for tdTom<sup>+</sup> apoptotic leukocytes, more so than MoDC, suggesting they remove the bulk of dying leukocytes (**Figure 7K, 7M and Figure 7 – figure supplement 3**). As negative controls, non-parabiotic tdTom<sup>CD45.2</sup> mice were processed in parallel (**Figure 7J, 7L – figure 7 supplement 3**). Collectively, these studies show that efferocytosis of dying leukocytes takes place in the injured sciatic nerve, and thus, serves as an important mechanism to clear the nerve of AC corpses.



## **Csf2 deficiency skews the immune response in the injured nerve toward classically activated Ly6C<sup>hi</sup> monocytes**

While PNS injury elicited inflammation is important for axon regeneration, it is not clear whether inflammation in the nerve or axotomized DRGs is a primary driver of peripheral axon regeneration, or conditioning lesion induced central axon growth (**Figure 8A**). Bulk RNA-seq of axotomized DRGs and scRNA-seq of injured nerve identified chemokine and cytokine ligand-receptor systems preferentially expressed in the injured nerve. GM-CSF signaling is of interested because this cytokine is present in the injured nerve and has been implicated in neuroprotection and axon repair (Be'eri et al., 1998; Franzen et al., 2004; Legacy et al., 2013). Moreover, GM-CSF increases surface expression of galectin-3 (Saada et al., 1996) and in non-neural tissues functions as a bridging molecule for efferocytosis of apoptotic immune cells (Erriah et al., 2019; Wright et al., 2017). Transcripts for the GM-CSF receptor subunits (*Csf2ra* and *Csf2rb*) are strongly expressed by myeloid cells in the injured nerve (**Figure 8B, 8C**), but not in axotomized DRGs (**Figure 4K, 4L**). To assess the role in nerve injury triggered inflammation, we employed *Csf2*<sup>-/-</sup> mice (**Figure 8 - figure supplement 1**) and subjected them to SNC. Flow cytometry was used to quantify immune cell profiles in naïve nerves and at 1d, 3d, and 7d post-SNC. In naïve WT and *Csf2*<sup>-/-</sup> mice, the number of endoneurial Mac is comparable, and the majority of them are Ly6C<sup>-</sup> or Ly6C<sup>int</sup> cells (**Figure 8D, 8E**). In the d3 injured nerve, there is a strong increase in the Mo/Mac population, in both, WT and *Csf2*<sup>-/-</sup> mice (**Figure 8F, 8G**). However, when analyzed for surface Ly6C expression, significantly fewer Ly6C<sup>-</sup> cells are present in *Csf2*<sup>-/-</sup> mice. Conversely, the population of Ly6C<sup>hi</sup> cells is significantly elevated in *Csf2*<sup>-/-</sup> mice when compared to WT mice (**Figure 8H**). This indicates that Mo/Mac maturation and inflammation resolution in the injured nerve of *Csf2*<sup>-/-</sup> mice is significantly delayed. Delayed maturation is only observed in the Mo/Mac population, since analysis of surface Ly6C expression on MoDC is comparable between WT and *Csf2*<sup>-/-</sup> mice (**Figure 8I**).

## **Csf2 is required for conditioning lesion induced dorsal column axon regeneration**

To assess whether proper Mo/Mac maturation in the injured nerve is important for conditioning lesion induced regeneration of central axon projections, adult WT and *Csf2*<sup>-/-</sup> mice were subjected to a bilateral SNC or sham operated. Seven days later, a dorsal column lesion (DCL) was placed at cervical level 4 of the spinal cord. Five weeks following DCL, cholera toxin B (CTB) traced dorsal column axons were analyzed in longitudinal spinal cord sections (**Figure 8A**). DCL causes axon “die-back” (Horn et al., 2008). In WT mice without conditioning lesion, there is a 600± 80 µm gap between the lesion center, and the most proximal, CTB labeled axons (**Figure 8J, 8K**). In WT mice that received a conditioning lesion, traced axons grew close to the spinal cord injury site (**Figure 8J, 8K**). In parallel processed *Csf2*<sup>-/-</sup> mice, without conditioning lesion, there is a 720± 120 µm gap between

53 the lesion center, and the most proximal CTB labeled axons (**Figure 8J, 8K**). However, in *Csf2*<sup>-/-</sup> mice  
54 subjected to a conditioning lesion, dorsal column axon regeneration is not significantly enhanced  
55 (**Figure 8J, 8K**). This shows that *Csf2* is important for conditioning lesion induced central axon  
56 regeneration.

57 GM-CSF has pleiotropic functions and its receptors are found on hematopoietic cells, glial  
58 cells, and subsets of neurons (Donatien et al., 2018; Franzen et al., 2004). SNC leads to upregulation  
59 of GM-CSF in the nerve (Mirski et al., 2003) and acute administration of GM-CSF following SNC  
60 leads to a transient increase in PNS axon regeneration (Bombeiro et al., 2018). To assess whether  
61 loss of *Csf2* attenuates neurite outgrowth *in vitro*, we cultured DRG neurons from adult WT and *Csf2*<sup>-/-</sup>  
62 mice. After 20 h, many neurons with axons were identified in both WT and *Csf2*<sup>-/-</sup> cultures (**Figure**  
63 **8L**). Quantification of axon growth did not identify *Csf2* dependent differences in total axon length or  
64 the longest axon (**Figure 8M**). A second cohort of WT and *Csf2*<sup>-/-</sup> mice was subjected to a  
65 conditioning lesion 3d prior to harvesting of axotomized DRGs. In both WT and *Csf2*<sup>-/-</sup> cultures,  
66 neurite outgrowth is significantly increased when compared to DRGs prepared from naive mice  
67 (**Figure 8M**). Collectively, this shows that reduced axon regeneration in the dorsal columns of *Csf2*<sup>-/-</sup>  
68 mice is not due to loss of conditioning lesion induced activation of neuron-intrinsic growth programs  
69 and indicates that *Csf2* promotes regeneration through cell non-autonomous, extrinsic mechanisms.

## 70 Discussion

71 We show that compression injury to the sciatic nerve triggers massive infiltration of blood-borne  
72 immune cells into the nerve. Granulocytes enter first, closely followed by Ly6C<sup>hi</sup> monocytes. After a  
73 short pro-inflammatory phase, the immune milieu rapidly transitions toward resolution and is  
74 dominated by Ly6C<sup>-</sup> Mac. Analysis of axotomized DRGs revealed upregulation of immune-associated  
75 gene co-expression networks, however infiltration of blood-borne immune cells was very limited.  
76 DRG resident macrophages downregulate surface Ly6C upon nerve injury and undergo striking  
77 morphological changes. Single-cell RNA-seq identified 10 immune cell clusters in the injured nerve.  
78 Monocytes and their descendants, Mac1-Mac5 subpopulations and MoDC are abundantly present.  
79 The immune compartment includes a population of blood-derived, proliferating myeloid cells (Mac5)  
80 with stem-like features. Mononuclear phagocytes in the injured nerve form a connected continuum of  
81 8 cell clusters, including a subpopulation of Arg1<sup>+</sup> Mac localized to the nerve crush site. In contrast,  
82 F4/80<sup>+</sup> Mac are more evenly distributed and associated with Wallerian degeneration. Apoptotic cell  
83 corpses rapidly accumulate in the injured nerve. Experiments with parabiotic mice show that Mo/Mac  
84 and MoDC contribute to nerve debridement by “eating” apoptotic leukocytes. In *Csf2*<sup>-/-</sup> mice, pro-  
85 inflammatory Ly6C<sup>hi</sup> Mo/Mac are elevated in the injured nerve, while the number of anti-inflammatory  
86 Ly6C<sup>-</sup> cells is reduced. This exacerbation of inflammation correlates with loss of conditioning-lesion  
87 induced central axon regeneration. Collectively, a comparative analysis of the immune response to  
88 PNS injury reveals striking differences in the inflammatory landscape at the nerve injury site, the  
89 degenerating nerve stump, and axotomized DRGs. Efferocytosis of apoptotic leukocytes is identified  
90 as a key mechanism of nerve debridement and inflammation resolution. Perturbed resolution of nerve  
91 inflammation, as observed in *Csf2*<sup>-/-</sup> mice, blocks conditioning lesion induced central axon  
92 regeneration.

## 94 Evidence for specific immune compartments within the injured nerve

95 Traumatic PNS injury causes necrosis of SC, MES, and vasculature-associated cells at the nerve  
96 injury site. Disruption of the vasculature leads to endoneurial bleeding and tissue hypoxia. Necrosis is  
97 a violent form of cell death that disrupts the plasma membrane and leads to the release of  
98 intracellular damage-associated molecular patterns (DAMPs) into the extracellular milieu. Release of  
99 intracellular content, in any tissue, causes a strong pro-inflammatory response (Frank and Vince,  
100 2019; Vannella and Wynn, 2017). Distal to the nerve crush site, transected nerve fibers undergo  
101 Wallerian degeneration and release DAMPs as they disintegrate. However, in the distal nerve the  
102 abundance and composition of DAMPs, such as double-stranded DNA and nuclear proteins, is very  
103 different from the nerve crush site (Bortolotti et al., 2018). Thus, depending on where Mo enter the  
104 injured nerve, they may encounter very different microenvironments and adapt site specific

phenotypes (Cane et al., 2019). The strong accumulation of *Arg1-YFP*<sup>+</sup> cells at the nerve injury site, but not along degenerating fibers, supports the idea that Mo/Mac adapt microenvironment specific phenotypes. Studies with chimeric mice show that hematogenous leukocytes first accumulate at the injury site and later along severed fibers that undergo Wallerian degeneration. The density of blood-derived leukocytes is highest at the injury site and correlates with the extent of tissue damage. We speculate that F4/80<sup>+</sup> Mac associated with Wallerian degeneration function in phagocytosis of myelin debris and degenerated axons, whereas *Arg1*<sup>+</sup> Mac near the injury site primarily function in removal of necrotic and apoptotic cell corpses. In support of this idea, *Arg1*<sup>+</sup> Mac, highly enriched in cluster Mac4, express the highest levels of engulfment receptors and gene products important for reverse cholesterol transport, a strong indicator for ongoing efferocytosis (Yvan-Charvet et al., 2010).

### **Efferocytosis of apoptotic leukocytes in the injured sciatic nerve**

Studies with chimeric mice show that upon sciatic nerve injury, Mo/Mac, and to a lesser extent MoDC, participate in nerve debridement by eating dying leukocytes. Bridging molecules that facilitate recognition of AC are abundantly expressed by immune and non-immune cells in the injured nerve. Compared to Mac from naïve PNS tissue, cells in subcluster Mac4 of the injured nerve show highly elevated expression of engulfment receptors. Some engulfment receptors, including *Lrp1*, *Axl*, and the scavenger receptor class B member 2 (*Scarb2*), are expressed by MES and repair SC, suggesting that immune and non-immune cells participate in nerve debridement, possibly including efferocytosis. Whether the large and diverse array of engulfment receptors expressed in the injured nerve reflects eating of specific debris, AC corpses, or a high degree of functional redundancy is unknown and requires further investigation. The most likely prey eaten by Mo/Mac and MoDC are dying neutrophils. Neutrophils are very abundant at early post-injury time points, have a short life span, and spontaneously die by apoptosis (Greenlee-Wacker, 2016; Lindborg et al., 2017). In non-neural tissues, efferocytosis of neutrophils triggers anti-inflammatory responses in Mo, Mac, and DC, a prerequisite for inflammation resolution (Greenlee-Wacker, 2016). Thus, efferocytosis is not simply a mechanism for garbage removal, but also a key driver to reprogram professional phagocytes from a pro-inflammatory to an anti-inflammatory state (Boada-Romero et al., 2020; Eming et al., 2017; Ortega-Gomez et al., 2013). In a similar vein, efferocytosis in the injured sciatic nerve may drive inflammation resolution and wound healing. In humans, dysregulation of efferocytosis can cause chronic inflammatory and autoimmune diseases, including asthma, systemic lupus erythematosus, and atherosclerosis (Kawano and Nagata, 2018). Additional studies are needed to determine whether defective efferocytosis and impaired inflammation resolution in the PNS contribute to excessive tissue damage and neuropathic pain.

## **The immune compartment of the 3-day injured sciatic nerve exhibits an immunosuppressive character**

Removal of apoptotic cell corpses is closely associated with the induction of immunological self-tolerance. Commensurate with this, the low presence of lymphocytes and NK cells in the nerve indicates that the microenvironment is immunologically “cold” and dominated by immunosuppressive mechanisms. We propose that efferocytosis in the injured nerve is key to switch from a pro-inflammatory environment to resolution and restoration of tissue integrity (Kourtzellis et al., 2020; Ortega-Gomez et al., 2013). At 3d post-SNC, pro-inflammatory cytokines and chemokines (*Ccl2*, *Ifrng*, *Il1a*, *Il1b*, *Tnf*) are very low with the exception of *Ccl2* expressed by Mac4 and eMES. Most myeloid cells express high levels of anti-inflammatory *Cd52*, a glycoprotein that binds to HMGB1 to suppress T cell function (Bandala-Sanchez et al., 2018; Rashidi et al., 2018). *Trem2*<sup>+</sup>*Arg1*<sup>+</sup> cells are strongly enriched in cluster Macs4 and show gene signatures suggestive of myeloid suppressive cells (Katzenelenbogen et al., 2020). Further evidence for an immunosuppressive environment is the strong expression of *Pirb* in myeloid cells, a type 1 membrane protein with four cytoplasmic immunoreceptor tyrosine-based inhibitory motifs (ITIMs) that inhibit immune cell activation (van der Touw et al., 2017). Myeloid inhibitory C-type lectin-like receptor (*Clec12a*), *Lair1* (leukocyte-associated Ig-like receptor-1), *Fcgr2b* (low affinity immunoglobulin gamma Fc region receptor IIb), and the CD300 family receptors *Cd300a* and *Cd300lf*, all of which contain ITIMs (Rozenberg et al., 2018), are strongly expressed, and thus, may reduce nerve inflammation. TGFβ is expressed by efferocytotic Macs in the lung (Yoon et al., 2015). In the injured sciatic nerve, *Tgfb1* is expressed by myeloid cells and is important for axon regeneration (Clements et al., 2017; Kourtzellis et al., 2020). Cells in clusters Mac1, Mac2, and Mac3 express high levels of *Rbpj*, a TF that restrains ITAM (immunoreceptor tyrosine-based activation motif) signaling and promotes an M2-like, resolving Mac phenotype (Foldi et al., 2016). Mac4 cells express the transmembrane glycoprotein NMB (*Gpnmb*), a negative regulator of inflammation that has protective effects following tissue injury (Zhou et al., 2017). Of interest, in the 3d injured nerve, Mac1, Mac3, and Mac4 strongly express the TFs *Maf/c-Maf* and *Mafb/MafB*. MafB promotes reprogramming of macrophages into an M2-like phenotype (Kim, 2017) and c-Maf is a checkpoint that programs Mac and is critical for the acquisition of an immunosuppressive phenotype (Liu et al., 2020).

## **Csf2 deficiency alters nerve inflammation and blocks conditioning lesion induced axon regeneration.**

Nerve injury in WT-tdTom parabionts revealed massive infiltration of immune cells into the injured nerve but not axotomized DRGs. This observation was independently confirmed by flow cytometry, Western blotting, 3D reconstruction of Iba1<sup>+</sup> cells, and RNA-seq of axotomized DRGs. The small

75 increase of hematogenous leukocytes in axotomized DRGs was unexpected, since infiltration of  
76 Mo/Mac is thought to be a key driver of conditioning lesion induced axon regeneration (Kwon et al.,  
77 2015; Richardson and Issa, 1984; Zigmond and Echevarria, 2019). Consistent with previous reports,  
78 sciatic nerve injury causes a strong increase in Iba1 immunoreactivity in DRGs. We provide evidence  
79 that increased Iba1 immunoreactivity is, at least in part, a reflection of macrophage morphological  
80 changes triggered by nerve injury. Additional mechanisms may include local myeloid cell proliferation  
81 (Yu et al., 2020) and infiltration of a small number of blood-borne myeloid cells.

82 SNC triggers an inflammatory response in the nerve and in axotomized DRGs, although  
83 quantitatively and qualitatively very different, it remains unclear which immune compartment is  
84 important for conditioning lesion elicited axon regeneration. To revisit this question, we took  
85 advantage of RNA-seq datasets generated from DRGs and nerves and searched for immune  
86 signaling pathways preferentially upregulated in the injured nerve, but not axotomized DRGs.  
87 Focusing on GM-CSF signaling, a cytokine that rapidly accumulates in the distal nerve stump (Mirski  
88 et al., 2003), we observed strong expression of the GM-CSF receptor subunit (*Csf2ra* and *Csf2rb*) in  
89 nerve macrophages but not axotomized DRGs. GM-CSF is known to promote Mo migration and Mac  
90 polarization (Ijaz et al., 2016; Vogel et al., 2015; Wicks and Roberts, 2016). Of interest, GM-CSF  
91 upregulates surface expression of galectin-3 on SC and Mac (Saada et al., 1996) and galectin-3 is  
92 thought to promote phagocytosis of myelin debris and participate in re-programming of Mac toward  
93 an anti-inflammatory phenotype (Erriah et al., 2019; Rotshenker, 2009). Recent evidence shows that  
94 galectin-3 promotes efferocytosis of neutrophils and promotes inflammation resolution (Quenum  
95 Zangbede et al., 2018; Wright et al., 2017). Following SNC in *Csf2*<sup>-/-</sup> mice, the ratio of Ly6C<sup>hi</sup> to Ly6C<sup>-</sup>  
96 Mo/Mac is significantly skewed toward the former. Functional studies with *Csf2*<sup>-/-</sup> mice highlight a  
97 critical role for conditioning lesion induced regenerative growth of severed dorsal column axons.  
98 Neurite outgrowth studies with primary DRG neurons suggest that the regenerative failure in *Csf2*<sup>-/-</sup>  
99 mice is not due to failed activation of DRG neuron intrinsic growth programs, but due to changes in  
100 extrinsic, environmental influences. Because *Csf2* receptor expression is very low in axotomized  
101 DRGs, this suggests that *Csf2* dependent accumulation of Ly6C<sup>-</sup> Mac in the nerve is important for  
102 conditioning lesion induced axon regeneration. We speculate that *Csf2* functions non-cell  
103 autonomously in the injured nerve to generate an extracellular milieu capable to sustain neuron  
104 intrinsic growth programs activated by injury. Similarly, studies of injured corticospinal neurons show  
105 that axon injury is sufficient for the induction of neuron-intrinsic growth programs, but not  
106 maintenance. However, neuron-intrinsic growth programs in CNS neurons can be maintained by  
107 environmental cues released from stem cells grafted near the injury site (Kumamaru et al., 2018;  
108 Poplawski et al., 2020). While our studies demonstrate an important role for *Csf2* in conditioning  
109 lesion induced axon regeneration, we cannot rule out potential contributions by DRG macrophages.

l0 However, the small number of hematogenous macrophages detected in axotomized DRGs suggests  
l1 that potential pro-regenerative immune mechanisms would need to be exerted by tissue resident  
l2 macrophages. We acknowledge that axon regeneration was examined in *Csf2* global knock-out mice,  
l3 and thus, it is possible that *Csf2* deficiency affects immune cells before they enter the injured sciatic  
l4 nerve (Hamilton, 2019) or within the injured spinal cord (Choi et al., 2014; Huang et al., 2009).

l5 Taken together, we provide a comparative analysis of SNC induced inflammation in the nerve  
l6 and axotomized DRGs and identify two very different immune compartments, the former primarily  
l7 comprised of hematogenous leukocytes and latter of tissue resident endoneurial Mac. Mac  
l8 subpopulations in the injured nerve are not uniformly distributed, indicating the existence of specific  
l9 immune microenvironments. Efferocytosis of dying leukocytes is observed in the injured nerve, and  
l0 thus, contributes to nerve debridement and inflammation resolution. If this process is curtailed,  
l1 conditioning-lesion induced regeneration of DRG neuron central axons is impaired.

l2

## 23 **Acknowledgment**

24 We thank Richard Zigmond and members of the Giger lab for critical reading of the manuscript. This  
25 work was supported by NIH T32 NS07222, Training in Clinical and Basic Neuroscience (AK), NIH  
26 T32 GM113900, Training Program in Translational Research (LH), the New York State Department of  
27 Health Spinal Cord Injury Program C33267GG (EH and RG), the Wings for Life Foundation (CY), the  
28 National Eye Institute (NEI), National Institutes of Health, R01EY029159 and R01EY028350 (BMS  
29 and RG), the Stanley D. and Joan H. Ross Chair in Neuromodulation fund (BMS), and the Dr Miriam  
30 and Sheldon G. Adelson Medical Research Foundation (RK, DG, RG).

31



32 **Material and Methods:**

33  
34 **Key resources table**

| Reagent Type | Designation                                    | Source or Reference          | Identifiers | Additional Information       |
|--------------|------------------------------------------------|------------------------------|-------------|------------------------------|
| Antibody     | Neurofilament heavy chain (chicken polyclonal) | Aves Lab                     | NFH         | 1:750                        |
| Antibody     | anti-chicken Cy3 (donkey polyclonal)           | Jackson Immunoresearch       | 703-165-155 | 1:200                        |
| Antibody     | Iba1 (rabbit polyclonal)                       | Wako Chemicals               | 019-19741   | 1:500                        |
| Antibody     | F4/80 (Rat IgG2b monoclonal)                   | Thermo Fisher Scientific     | ma1-91124   | 1:500 - 1:1000               |
| Antibody     | CD68 (rabbit polyclonal)                       | Abcam                        | ab125212    | 1:500                        |
| Antibody     | GFAP (rabbit polyclonal)                       | DAKO                         | Z033429-2   | 1:500                        |
| Antibody     | SCG10 (rabbit polyclonal)                      | Novus Biologicals            | NBP149461   | 1:500 - 1:1000               |
| Antibody     | CTB (goat polyclonal)                          | List Biological Laboratories | 703         | 1:10,000                     |
| Antibody     | CD11b (rabbit monoclonal)                      | Abcam                        | ab133357    | 1:200-1:1000                 |
| Antibody     | ERK1/2 (rabbit polyclonal)                     | Cell Signaling               | 9102        | 1:5000                       |
| Antibody     | anti-rabbit HRP (donkey polyclonal)            | EMD Millipore                | AP182P      | 1:2000-1:10000               |
| Antibody     | CD16/32 (Rat-IgG2a monoclonal)                 | BD Pharmingen                | 553141      | 1µg / 1 million cells / 25µL |
| Antibody     | CD11b-PE-Cy7 (Rat-IgG2b monoclonal)            | Thermo Fisher Scientific     | 25-0112-82  | 1:200                        |
| Antibody     | Isotype Control-PE-Cy7 (Rat-IgG2b monoclonal)  | Thermo Fisher Scientific     | 25-4031-82  | 1:100                        |
| Antibody     | CD45-e450 (Rat-IgG2b monoclonal)               | Thermo Fisher Scientific     | 48-0451-82  | 1:100                        |
| Antibody     | Isotype Control-e450 (Rat-IgG2b monoclonal)    | Thermo Fisher Scientific     | 48-4031-82  | 1:100                        |
| Antibody     | CD45.1-e450 (Mouse-IgG2a monoclonal)           | Biologend                    | 110721      | 1:100                        |
| Antibody     | Isotype Control-e450 (Mouse-IgG2a monoclonal)  | Biologend                    | 400235      | 1:100                        |
| Antibody     | CD45.2-APC (Mouse-IgG2a monoclonal)            | Biologend                    | 109813      | 1:100                        |
| Antibody     | Isotype Control-APC (Mouse-IgG2a monoclonal)   | Biologend                    | 400221      | 1:100                        |
| Antibody     | Ly6G-APC-Cy7 (Rat-IgG2a monoclonal)            | BD Biosciences               | 560600      | 1:100                        |

|                   |                                                     |                          |                  |       |
|-------------------|-----------------------------------------------------|--------------------------|------------------|-------|
| Antibody          | Isotype Control-APC-Cy7 (Rat-IgG2a monoclonal)      | BD Biosciences           | 552770           | 1:100 |
| Antibody          | CD11c-PerCP-Cy5.5 (ArmHam-IgG monoclonal)           | Thermo Fisher Scientific | 45-0114-82       | 1:100 |
| Antibody          | Isotype Control-PerCP-Cy5.5 (ArmHam-IgG monoclonal) | Thermo Fisher Scientific | 45-4888-80       | 1:100 |
| Antibody          | Ly6C-FITC (Rat-IgM monoclonal)                      | BD Biosciences           | 561085           | 1:100 |
| Antibody          | Isotype Control-FITC (Rat-IgM monoclonal)           | BD Biosciences           | 553942           | 1:100 |
| Antibody          | Iba1 (goat polyclonal)                              | Novus Biologicals        | NB100-1028       | 1:200 |
| Antibody          | anti-goat Alexa Fluor 488 (donkey polyclonal)       | Jackson ImmunoResearch   | 705-545-147      | 1:200 |
| Chemical Compound | TOPRO pan-nuclear stain                             | Thermo Fisher Scientific | T3605            |       |
| Chemical Compound | Fixable Viability Dye                               | Thermo Fisher Scientific | 65086614         | 1:500 |
| Chemical Compound | Proteinase K                                        | New England Biolabs      | P8107S           |       |
| Chemical Compound | 10 mM dNTP mix                                      | Promega                  | C1141            |       |
| Chemical Compound | 5X Green GoTaq Buffer                               | Promega                  | M791A            |       |
| Chemical Compound | GoTaq DNA polymerase                                | Promega                  | M3005            |       |
| Chemical Compound | Buprenorphine                                       | Par Pharmaceutical       | NDC12496-0757-1  |       |
| Chemical Compound | Ketamine                                            | Par Pharmaceutical       | NDC42023-115-10  |       |
| Chemical Compound | Xylazine                                            | Akorn                    | NDC59399-110-20  |       |
| Chemical Compound | Isoflurane                                          | McKesson Corporation     | 667940172        |       |
| Chemical Compound | Rhodamine-conjugated dextran MW 3,000 (Microruby)   | Life Technologies        | D-7162           |       |
| Chemical Compound | cholera toxin B (CTB)                               | Life Technologies        | C34775           |       |
| Chemical Compound | Puralube Eye ointment                               | Dechra                   | NDC-17033-211-38 |       |
| Chemical Compound | N2                                                  | Gibco                    | 17502048         |       |
| Chemical Compound | N1                                                  | Sigma                    | N6530            |       |
| Chemical Compound | Leibovitz-15 (L-15)                                 | Gibco                    | 21083-027        |       |
| Chemical Compound | Penicillin/Streptomycin                             | Life Technologies        | 15140-122        |       |
| Chemical Compound | DMEM Ham's F-12                                     | Gibco                    | 10565-018        |       |
| Chemical          | Fetal Bovine Serum                                  | Atlanta                  | S11550           |       |

| Compound          |                                                         | Biologicals                  |             |  |
|-------------------|---------------------------------------------------------|------------------------------|-------------|--|
| Chemical Compound | Cytosine arabinoside                                    | Sigma-Aldrich                | C1768       |  |
| Chemical Compound | collagenase type 2                                      | Worthington Biochemical      | LS004176    |  |
| Chemical Compound | PBS without Calcium, Magnesium                          | Gibco                        | 10010023    |  |
| Chemical Compound | poly-L-lysine MW 70,000-150,000                         | Sigma-Aldrich                | P4707       |  |
| Chemical Compound | laminin                                                 | Sigma-Aldrich                | L2020       |  |
| Chemical Compound | paraformaldehyde                                        | Sigma-Aldrich                | 158127-500G |  |
| Chemical Compound | Triton-X100                                             | Sigma-Aldrich                | T8787       |  |
| Chemical Compound | Bovine Serum Albumin (BSA) heat shock fraction V        | Fisher Scientific            | BP1600      |  |
| Chemical Compound | Hoechst 33342                                           | Invitrogen                   | H3570       |  |
| Chemical Compound | Tissue-Tek® O.C.T. Compound                             | Electron Microscopy Sciences | 62550-01    |  |
| Chemical Compound | β-glycerophosphate                                      | Sigma-Aldrich                | G9422-100G  |  |
| Chemical Compound | Sodium Orthovanadate (Na <sub>3</sub> VO <sub>4</sub> ) | Sigma-Aldrich                | S6508-10G   |  |
| Chemical Compound | protease inhibitor cocktail                             | Sigma-Aldrich                | P8340-5ML   |  |
| Chemical Compound | DC Protein Assay Kit                                    | Bio-Rad                      | 5000111     |  |
| Chemical Compound | 2x Laemmli sample buffer                                | Bio-Rad                      | 1610737     |  |
| Chemical Compound | β-mercaptoethanol                                       | EMD Millipore                | 6010        |  |
| Chemical Compound | blotting-grade blocker                                  | Bio-Rad                      | 1706404     |  |
| Chemical Compound | SuperSignal™ West Pico PLUS Chemiluminescent Substrate  | Thermo Fisher Scientific     | 34580       |  |
| Chemical Compound | SuperSignal™ West Femto Maximum Sensitivity Substrate   | Thermo Fisher Scientific     | 34095       |  |
| Chemical Compound | WesternSure PREMIUM Chemi Substrate                     | Li-Cor Biosciences           | 926-95000   |  |
| Chemical Compound | Fixable Viability Dye eF506                             | Thermo Fisher Scientific     | 65-0866-14  |  |
| Chemical Compound | TRIzol                                                  | Thermo Fisher Scientific     | 15596026    |  |
| Chemical Compound | Dispase                                                 | Sigma-Aldrich                | D4693       |  |
| Chemical Compound | Actinomycin D                                           | Sigma-Aldrich                | A1410       |  |

|                   |                                                 |                    |                 |  |
|-------------------|-------------------------------------------------|--------------------|-----------------|--|
| Chemical Compound | Percoll                                         | Sigma-Aldrich      | P4937           |  |
| Chemical Compound | MACS buffer                                     | Miltenyi           | 130-091-376     |  |
| Chemical Compound | Hanks balanced salt solution                    | Gibco              | 14025092        |  |
| Chemical Compound | Sucrose                                         | Fisher Scientific  | S5-500          |  |
| Other             | Pasteur pipette                                 | VWR                | 14673-010       |  |
| Other             | Flat Bottom Cell Culture Plates, 24-well        | Corning            | 3524            |  |
| Other             | Superfrost™ Plus Microscope Slides              | FisherScientific   | 12-550-15       |  |
| Other             | Zeiss Axio Observer Z1                          | Zeiss              | 491912-0049-000 |  |
| Other             | Zeiss AxioCam 503 mono camera                   | Zeiss              | 426559-0000-000 |  |
| Other             | EC PlnN 10x objective                           | Zeiss              | 420341-9911-000 |  |
| Other             | motorized tissue homogenizer                    | RPI                | 299200          |  |
| Other             | Fisher Scientific Sonic Dismembrator            | Fisher Scientific  | Model 500       |  |
| Other             | Refrigerated Centrifuge                         | Eppendorf          | 5424R           |  |
| Other             | photospectrometer                               | Molecular Devices  | SpectraMax M5e  |  |
| Other             | PVDF membrane                                   | EMD Millipore      | IPVH00010       |  |
| Other             | LI-COR C-Digit                                  | Li-Cor Biosciences | CDG-001313      |  |
| Other             | 70 µm cell strainer                             | Corning            | 352350          |  |
| Other             | Ammonium-Chloride-Potassium (ACK) Lysing Buffer | Gibco              | A1049201        |  |
| Other             | Clinical Centrifuge                             | Beckman Coulter    | Allegra 6R      |  |
| Other             | 40 µm filter                                    | BD Falcon          | 352340          |  |
| Other             | Myelin Removal Beads                            | Miltenyi           | 130-096-731     |  |
| Other             | MidiMACS separator                              | Miltenyi           | 130-042-302     |  |
| Other             | LS Columns                                      | Miltenyi           | 130-042-401     |  |
| Other             | Hemocytometer                                   | Millipore Sigma    | Z359629         |  |
| Other             | Chromium Next GEM Chip G                        | 10X Genomics, Inc  | NC1000127       |  |
| Other             | 10X Genomic Chromium Controller                 | 10X Genomics, Inc  | N/A             |  |
| Other             | NovaSeq Illumina 6000                           | Illumina           | N/A             |  |
| Other             | Cryostat                                        | Leica Biosystems   | CM3050S         |  |
| Other             | 70 um Cell Strainer                             | Corning            | 352350          |  |
| Other             | Confocal Microscope                             | Nikon              | C1              |  |
| Other             | Confocal Microscope                             | Leica Biosystems   | SP8             |  |

|                                         |                                   |                                     |                  |                                                                                             |
|-----------------------------------------|-----------------------------------|-------------------------------------|------------------|---------------------------------------------------------------------------------------------|
| Genetic Reagent (Mus musculus, C57BL/6) | <i>Csf2</i> <sup>-/-</sup>        | Jackson Laboratories                | Stock No: 026812 | PMID: 8171324 MGI: J:17978                                                                  |
| Genetic Reagent (Mus musculus, C57BL/6) | <i>ROSA26-TdTom</i>               | Jackson Laboratories                | Stock No: 007576 | PMID: 17868096 MGI: J:124702                                                                |
| Genetic Reagent (Mus musculus, C57BL/6) | CD45.1                            | Jackson Laboratories                | Stock No: 002014 | PMID: 11698303 MGI: J:109863<br>PMID 11994430 MGI: J:109854<br>PMID: 12004082 MGI: J:109853 |
| Genetic Reagent (Mus musculus, C57BL/6) | Wildtype, WT                      | Taconics                            | B6NTac           |                                                                                             |
| Genetic Reagent (Mus musculus, C57BL/6) | <i>Arg1-eYFP</i>                  | Jackson Laboratories                | Stock No: 015857 | PMID: 17450126 MGI: J:122735                                                                |
| Oligonucleotide                         | Csf2 Forward                      | Integrated DNA Technologies         | N/A              | 5'-GTGAAACACAAGTTACCACCTA TG-3'                                                             |
| Oligonucleotide                         | Csf2 Reverse                      | Integrated DNA Technologies         | N/A              | 5'-TTTGTCTTCCGCTGTCCAA-3'                                                                   |
| Oligonucleotide                         | Neomycin Forward                  | Integrated DNA Technologies         | N/A              | 5'-CTTGGGTGGAGAGGCTATTC-3'                                                                  |
| Oligonucleotide                         | Neomycin Reverse                  | Integrated DNA Technologies         | N/A              | 5'-AGGTGAGATGACAGGAGATC-3'                                                                  |
| Software                                | WIS-Neuromath                     | Weizmann Institute of Science       | Version 3.4.8    | PMID: 23055261                                                                              |
| Software                                | Image Studio Software             | Li-Cor Biosciences                  | Version 5.2.5    |                                                                                             |
| Software                                | NovaSeq control software          | Illumina                            | Version 1.6      |                                                                                             |
| Software                                | Real Time Analysis (RTA) software | Illumina                            | Version 3.4.4    |                                                                                             |
| Software                                | Cellranger                        | 10X Genomics, Inc                   | Version 3.1.0    |                                                                                             |
| Software                                | FACSDiva                          | BD Biosciences                      | Version 7        |                                                                                             |
| Software                                | FlowJo                            | FlowJo LLC                          | Version 10.6.2   |                                                                                             |
| Software                                | Seurat                            | Satija Lab - New York Genome Center | Version 3.1.2    |                                                                                             |
| Software                                | R                                 | r-project.org                       | Version 3.6.2    |                                                                                             |
| Software                                | Slingshot                         | Bioconductor                        | Version 1.4.0    |                                                                                             |
| Software                                | Ranger                            | Comprehensive R Archive Network     | Version 0.12.1   |                                                                                             |
| Software                                | Prism                             | GraphPad                            | Version 7 and 8  |                                                                                             |
| Software                                | Imaris                            | Bitplane                            |                  |                                                                                             |
| Software                                | Leica Application Suite (LAS X)   | Leica                               |                  |                                                                                             |
| Software                                | Zen Application Software          | Zeiss                               | Pro 3.8          |                                                                                             |
| Other                                   | SomnoSuite                        | Kent Scientific                     | SS-01            |                                                                                             |
| Other                                   | Povidone-Iodine Prep Pad          | PDI Healthcare                      | B40600           |                                                                                             |

|       |                                                   |                             |          |  |
|-------|---------------------------------------------------|-----------------------------|----------|--|
| Other | Alcohol Prep, Sterile, Md, 2 Ply                  | Covidien                    | 6818     |  |
| Other | Fine Forceps Dumont #55 Dumoxel                   | Roboz Surgical Instrument   | RS-5063  |  |
| Other | 7mm Reflex Wound Clips                            | Cell Point Scientific       | 203-1000 |  |
| Other | Micro Friedman Rongeur                            | Roboz Surgical Instrument   | RS-8306  |  |
| Other | McPherson-Vannas Micro Dissecting Spring scissors | Roboz Surgical Instrument   | RS-5600  |  |
| Other | COATED VICRYL® (polyglactin 910) Suture           | Ethicon                     | J463G    |  |
| Other | dumont #7 curved forceps                          | Fine Science Tools          | 11271-30 |  |
| Other | Miltex halsted mosquito forceps                   | Integra LifeSciences        | 724      |  |
| Other | Nanofil 10 µL syringe                             | World Precision Instruments | NANOFIL  |  |
| Other | 36g beveled nanofil needle                        | World Precision Instruments | NF36BV-2 |  |
| Other | Non-absorbable sutures                            | Ethicon                     | 640G     |  |
| Other | Absorbable sutures                                | Ethicon                     | J463G    |  |

35

36

37

## Animals

38

39

40

41

42

43

44

45

46

## Genotyping of *Csf2* mice

48

49

50

51

52

53

54

Genomic (g) DNA was isolated from adult WT or *Csf2*<sup>-/-</sup> mice. Briefly, tissue samples were harvested and digested in lysis buffer (10 mM TrisHCl pH8, 25 mM EDTA, 0.1 M NaCl, 1% SDS) with Proteinase K overnight at 55°C. The following day, gDNA was extracted and resuspended in water. The following PCR primers were used: *Csf2* forward 5'-GTGAAACACAAGTTACCACCTATG-3', *Csf2* reverse 5'-TTTGTCTTCCGCTGTCCAA-3'; neomycin forward 5'-CTTGGGTGGAGAGGCTATTC-3', neomycin reverse 5'-AGGTGAGATGACAGGAGATC-3'. PCR parameters: 95°C for 2 min, (95°C for 1 min, 55°C for 30 s, 72°C for 20 s) repeated for 35 cycles, 72°C for 5 min.

## 55 **Surgical Procedures**

56 All surgeries were carried out under aseptic conditions. Mice were deeply anesthetized with a mixture  
57 of ketamine (100 mg/kg) and xylazine (10 mg/kg) or with isoflurane (5% induction, 2-3%  
58 maintenance, SomnoSuite Kent Scientific). Buprenorphine (0.1 mg/kg) was given pre-emptively and  
59 post-operatively.

60  
61 *Sciatic nerve crush injury* - For sciatic nerve surgery, thighs were shaved and disinfected with 70%  
62 ethanol (Covidien, 6818) and iodine (PDI Healthcare, B40600 A small incision, at mid-thigh, was  
63 made on the skin, underlying muscles separated, and the sciatic nerve exposed. For sham operated  
64 mice, the nerve was exposed but not touched. For SNC, the nerve was crushed for 15 seconds, using  
65 fine forceps (Dumont #55, Roboz Surgical Instruments, RS-5063). Skin was closed with 7mm reflex  
66 wound clips (Cell Point Scientific, 203-1000).

67  
68 *Dorsal column lesion* - Spinal cord surgery was carried out as described previously (Yoon et al., 2013).  
69 Briefly, the C4 lamina was removed using micro-rongeurs (Roboz Surgical Instruments, RS-8306)  
70 under a stereomicroscope. The spinal column was exposed, and McPherson-Vannas Micro  
71 Dissecting Spring Scissors (Roboz Surgical Instruments, RS-5600) were inserted 1 mm deep. A  
72 hemisection of the dorsal spinal cord was carried out to transect all axons in the dorsal columns. The  
73 lesion was confirmed by probing with fine forceps. Next, dorsal muscle layers were closed using  
74 Perma-Hand Black sutures (5-0, Ethicon) and skin incisions were closed using coated Vicryl sutures  
75 (5-0, Ethicon, J463G)

76 *Axon tracing* - For tracing of ascending sensory axons in the dorsal columns, tracer was injected into  
77 the sciatic nerve 5 weeks after SCI (Yoon et al., 2013). Briefly, the sciatic nerve was exposed at mid-  
78 thigh level and held in place using dumont #7 curved forceps (Fine Science Tools, 11271-30) and  
79 Miltex halsted mosquito forceps (Integra LifeSciences, 12460-174) to provide tension for the injection.  
80 Cholera toxin B (CTB, List Biological Laboratories, #104, 1.5  $\mu$ l of 1% solution in water) was injected  
81 into sciatic nerves using a Nanofil 10  $\mu$ L syringe with a 36 gauge beveled needle (World Precision  
82 Instrument, NF36BV-2). The needle was removed ~30 sec after injection to prevent backflow of fluid.  
83 Mice were sacrificed 3 days after tracer injection, spinal cords sectioned and stained as described  
84 (Yoon et al., 2013). Dorsal column lesion completeness was confirmed by absence of traced axons  
85 in transverse spinal cord sections rostral to the lesion. The distance between the lesion epicenter  
86 and the tip of traced axons was quantified by an investigator blinded with respect to mouse genotype  
87 and whether a conditioning lesion was applied or not.

38 *Parabiosis* - Isochronic, same sex mice were housed in the same cage for at least 2 weeks prior to  
39 surgery. Mice were deeply anesthetized and their left or right sides shaved from just above the  
40 shoulder to below the knee. Eye ointment was applied to both mice to prevent drying. The skin was  
41 cleaned 3 times using ethanol and iodine pads before a unilateral skin-deep incision was made from  
42 the elbow to the knee on each animal. Skin fascia adjacent to the incision was peeled back using a  
43 pair of blunt forceps. Mice were joined at the knee and elbow joints using non-absorbable sutures by  
44 running the suture needle through the muscle just under each joint in both animals and completing  
45 the suture. Absorbable sutures were used to join the skin of each mouse around the shoulder and  
46 hindlimbs. 7mm reflex wound clips were used to join the remainder of skin between the mice. Mice  
47 were allowed to recover for 3-4 weeks before further surgery.

### 48 49 **DRG cultures**

50 Unilateral SNC was performed on adult mice 3 days prior to culture. The uninjured side was used as  
51 control. The dorsal spinal column from adult mice was exposed and the identity of lumbar DRGs  
52 established by counting vertebrae from the hipbone (Sleigh et al., 2016). L3-L5 DRGs were dissected  
53 and harvested into L-15 with N2 (Gibco, 17502048) or N1 (Sigma-Aldrich, N6530) supplement on ice.  
54 DRGs were rinsed 5 times in L-15 with Penicillin/Streptomycin (Life Technologies, 15140-122) and  
55 minced in growth media (DMEM Ham's F-12, 10% FBS, 1X N2 or N1 supplement and 16 nM  
56 Cytosine arabinoside (Sigma-Aldrich, C1768) with McPherson-Vannas Micro Dissecting Spring  
57 scissors. DRGs were digested in collagenase type 2 (10 mg/ml, Worthington Biochemical, LS004176)  
58 in  $\text{Ca}^{2+}$ ,  $\text{Mg}^{2+}$  free PBS (Gibco, 100010023) at 37°C for 20 minutes. Ganglia were dissociated by  
59 trituration using a fire polished Pasteur pipette, followed by centrifugation (5 minutes, 160 x g) and  
60 trituration in wash buffer (DMEM Ham's F-12, Gibco, 10565-018; 10% FBS, Atlanta Biologicals,  
61 S11550; 1% Penicillin/Streptomycin, Life Technologies, 15140-122) twice. Cells were plated in growth  
62 media at a density of 0.5 DRG per well in a 24-well plate (flat bottom plates, Corning, 3524) coated  
63 with poly-L-lysine 0.01% (MW 70,000-150,000) (Sigma-Aldrich, P4707) for 45 minutes at 37°C,  
64 followed by wash in  $\text{dH}_2\text{O}$ , dried and coated with 0.2 mg/mL laminin (Sigma-Aldrich, L2020). Cells  
65 were placed in a humidified incubator at 37°C, 5%  $\text{CO}_2$  for 20 hours.

### 66 **Immunofluorescence staining**

67 Primary DRG neuron cultures were fixed in 4% paraformaldehyde (PFA) in 1x PBS (Sigma-Aldrich,  
68 158127) for 15 minutes at RT, followed by 2 brief rinses in PBS. Cells were permeabilized in 0.3%  
69 Triton-X100 (Sigma, T8787) in PBS for 5 minutes at RT. Cells were incubated in blocking buffer, 2%  
70 FBS, 2% heat shock fraction V BSA (Fisher Scientific, BP1600), 0.3% Triton-x-100 in PBS for 1 hour.  
71 Cells were incubated with anti-Neurofilament heavy chain (NFH, 1:100; Aves Lab, NFH) in blocking



22 buffer overnight at 4°C and rinsed 3x in 0.3% triton-x-100 in PBS, 5 minutes each. Donkey anti-  
23 chicken Cy3 (1:200, Jackson ImmunoResearch, 703-165-155) in blocking buffer was added for 45  
24 minutes at room temperature. Cells were rinsed in PBS for 5 minutes. Hoechst 33342 (1:50,000 in  
25 PBS; Invitrogen, H3570) was added for 10 minutes at RT, followed by 2 washes in PBS. Cells were  
26 imaged on a Zeiss Axio Observer Z1 fitted with a Zeiss Axiocam 503 mono camera using the EC  
27 PlnN 10x objective. Single plane, tile scans were randomly acquired for each well. For  
28 immunofluorescence staining of neural tissues, mice were killed and perfused transcardially with ice-  
29 cold PBS for 2 min followed by ice-cold, freshly prepared 4% paraformaldehyde for 10 min. Spinal  
30 cord, sciatic nerves, and L4-L5 DRGs were collected and post-fixed in perfusion solution overnight.  
31 After that the solution was switched to 30% sucrose in PBS and tissues were kept at 4°C degrees for  
32 at least 12 h. Tissues were covered with tissue Tek (Electron Microscopy Sciences, 62550-01) and  
33 stored at -80 °C. Spinal cord sections and longitudinal sciatic nerve sections were cut at 12 µm and  
34 DRGs at 10 µm thickness using a cryostat (Leica Biosystems, CM3050S). Sciatic nerve and DRG  
35 sections were mounted on Superfrost<sup>+</sup> microscope slides (Fisher Scientific, 12-550-15) and air dried  
36 for at least 12h. Spinal cord sections were stained in 24-well plates as free floating sections. The  
37 following primary antibodies were used, anti-Iba1 (1:500; WAKO, 019-19741), anti-F4/80 (1:500;  
38 Thermo Fisher Scientific, MA1-91124), anti-CD68 (1:500, Abcam, ab125212), anti-GFAP (1:500,  
39 DAKO, Z0334), anti-SCG10 (1: 2,000, Novus Biological, NBP1-49461), anti-CTB (1: 10,000, List  
40 Biological Laboratories, #703).

## 41 **Quantification of neurite outgrowth**

42 Neurite lengths was quantified as described previously (Robak et al., 2009). Briefly, neurofilament-H  
43 stained cultures were used for neurite growth analyses. Only cells with neurites ≥ 30 µm were  
44 included in the analyses from randomly acquired tile scans using WIS-Neuromath (Kalinski et al.,  
45 2019).

## 46 **Whole mount DRG analysis**

47 *Staining* - Mice were subjected to unilateral SNC as described above. L4 DRGs from the uninjured  
48 (intact) and injured side were dissected and post-fixed in 4% PFA/PBS overnight at 4°C. For tissue  
49 clearing of DRGs, we used the iDISCO technique (Bray et al., 2017; Renier et al., 2014). Briefly, post-  
50 fixed samples were washed in 1x PBS and then dehydrated at room temperature with a series of 15  
51 minute washes with methanol in 0.05x PBS (20%, 40%, 60%, 80% and 100% vol/vol). Samples were  
52 bleached overnight with 5% H<sub>2</sub>O<sub>2</sub> in 100% methanol at 4°C. The next day samples were rehydrated  
53 with a series of 15 minute washes of methanol in 0.05x PBS + 0.2% Triton x-100 (80%, 40%, 20%,  
54 and 0% vol/vol). Samples were permeabilized in 1xPBS with 0.2% Triton X-100, 20% DMSO, and  
55  
56

57 0.3M Glycine at 37°C for 4 hours, followed by blocking with overnight incubation at 37°C in 1xPBS  
58 with 0.2% Triton X-100, 10% DMSO, and 6% donkey serum. Samples were then washed twice for 1  
59 hour in room temperature 1xPBS with 0.2% Tween 20 and 10 µg/ml heparin (PTwH). Then, samples  
60 were incubated with goat anti-Iba1 (1:200, Novus Biologicals, NB100-1028) in PTwH plus 5% DMSO  
61 and 3% donkey serum at 37°C for 3 days. Samples were washed 6 times in PTwH: 3 washes for 15  
62 minutes at room temperature, followed by 2 washes for 1 hour at 37°C and last wash overnight at  
63 37°C. Incubation with donkey anti-goat Alexa Fluor 488 (1:200, Jackson ImmunoResearch, 705-545-  
64 147) and the pan-nuclear stain TOPRO3 (Thermo Fisher Scientific, T3605) was performed in PTwH  
65 solution plus 3% donkey serum for 2 days at 37°C. Then, the 6 washes in PTwH were repeated as  
66 above, and the next day samples were processed for clearing. Samples were dehydrated in  
67 methanol/water series of 20%, 40%, 60%, and 80% vol/vol for one hour each at room temperature  
68 followed by two washes in 100% methanol for 30 minutes each. Samples were then incubated in 66%  
69 dichloromethane (DCM) and 33% methanol, followed by two incubations in 100% DCM for 30  
70 minutes each. Finally, samples were cleared and stored in dibenzylether (DBE).

71  
72 *Morphological analysis* - For each cleared DRG, three different regions of interest were acquired on  
73 an inverted Nikon C1 confocal microscope at 60X using 0.25µm z-steps. Image stacks were  
74 processed in ImageJ software for background subtraction (rolling ball radius of 10 pixels for Iba1  
75 channel, and 20 for Topro3 signal), followed by mean filtering (1.5-pixel radius for Iba1 signal, and 2.0  
76 for Topro3). Filtered images were then processed in Imaris software (Bitplane) to perform 3D surface  
77 rendering, and extraction of morphological characteristics (e.g number of structures, cell, and  
78 processes volume). Iba1 immunoreactive cells were categorized based on morphological  
79 parameters: somal shape, branch number, and branch extension. Amoeboid cells were defined as  
80 having rounded somata of variable size with occasional short ramifications. Elongated cells exhibited  
81 an extended and regular rod shaped or arced somal morphology with only rare short branches.  
82 Stellate cells were clearly distinguished from the other cell types by having three or more elongated  
83 and curved branches.

84  
85 *Density analysis* - For estimation of total Iba1 density, whole cleared DRGs were imaged using 3D tile  
86 scanning at 20X on a Leica Sp8 confocal microscope. Alignment and stitching were performed with  
87 the Leica Application Suite X (LAS X). Images were pre-processed using LAS X Lightning detection  
88 package, and subsequently processed using Imaris software. To estimate the total density of Iba1  
89 labeling within DRGs, 3D surface rendering of Iba1 was used, and the volume of reconstructions was

normalized against the total volume of the corresponding whole DRG. Group size was based on previously published work (Hollis et al., 2015).

### Western blot analysis

Sciatic nerves and L3-L5 DRGs were dissected and lysed separately in radioimmunoprecipitation assay (RIPA) buffer (150 mM NaCl, 50 mM Tris, 1% NP-40, 3.5 mM sodium dodecyl sulfate, 12 mM sodium deoxycholate, pH 8.0) supplemented with 50 mM  $\beta$ -glycerophosphate (Sigma-Aldrich, G9422-100G), 1 mM  $\text{Na}_3\text{VO}_4$  (Sigma-Aldrich, S6508-10G), and protease inhibitor cocktail (1:100, Sigma-Aldrich, P8340-5ML). Tissues were kept on ice, briefly homogenized with a motorized tissue homogenizer (RPI, 299200), and subjected to sonication (Fisher Scientific Sonic Dismembrator, Model 500) at 70% amplitude for 3 seconds. Tissue lysates were centrifuged at 15,000 rpm at 4°C for 10 minutes (Eppendorf, 5424R). The supernatant was transferred to a new tube and protein concentration was measured with a DC Protein Assay Kit (Bio-Rad, 5000111) using a photospectrometer at 750 nm (Molecular Devices, SpectraMax M5e). Samples were diluted with 2x Laemmli sample buffer (Bio-Rad, 1610737) containing 5%  $\beta$ -mercaptoethanol (EMD Millipore, 6010), boiled for 10 minutes at 100°C, and stored at -80°C for analysis. For SDS-PAGE, equal amounts of total protein (5-10  $\mu\text{g}$ ) were loaded per lane of a 15% gel. Separated proteins were transferred onto PVDF membrane (EMD Millipore, IPVH00010) for 2.5 hours at 200 mA in cold transfer buffer (25 mM TrisHCl, 192 mM Glycine, 10% Methanol). Membranes were blocked in 5% blotting-grade blocker (BioRad, 1706404) prepared in 1x TBS-T (TBS pH 7.4, containing 0.1% Tween- 20) for 1 hour at room temperature, and probed overnight at 4°C with the following primary antibodies diluted in 1x TBS-T with 3% BSA (Fisher Scientific, BP1600):  $\alpha$ -CD11b (1:1000, Abcam, ab133357),  $\alpha$ -ERK1/2 (1:5000, Cell Signaling Technologies, 9102). Horseradish peroxide (HRP)-conjugated  $\alpha$ -rabbit secondary IgG (EMD Millipore, AP182P) were used. All HRP-conjugated secondary antibodies were diluted at half the dilution of the corresponding primary antibody in 3% BSA in 1x TBS-T, and the HRP signal was developed with various strengths of chemiluminescent substrates from Thermo Fisher Scientific (Pico Plus, 34580 or Femto, 34095) or from Li-COR Biosciences (926-95000). Protein band intensity was visualized and quantified in the linear range using LI-COR C-Digit (CDG-001313) and Image Studio Software (Version 5.2.5).

### Cell isolation for flow cytometry

Adult mice, naïve and at d1, d3, and d7 post-SNC were deeply anesthetized with a mixture of Xylazine and Ketamine and perfused transcardially with ice-cold phosphate-buffered saline (PBS) for 5 minutes. DRGs at lumbar levels L3-L5 were harvested and pooled in ice-cold PBS. Injured and

24 uninjured sciatic nerves were dissected. From injured nerves, the proximal stump and the distal  
25 stump (including the injury site) were harvested and pooled separately. Similar sized segments from  
26 uninjured nerves were collected for comparison. In addition, spleen was harvested.

27  
28 *Flow cytometry* - To analyze immune cell profiles in dorsal root ganglia (DRG), sciatic nerves (SN),  
29 and spleen, mice were transcardially perfused for 5 min with ice-cold PBS to flush out all blood cells  
30 in circulation. The spleen was dissected, and splenocytes were passed through a 70 µm Falcon cell  
31 strainer (Corning, 352350). Red blood cells were lysed with Ammonium-Chloride-Potassium (ACK)  
32 lysing buffer. DRG and SN were harvested bilaterally. For analysis of DRGs (6 DRGs per mouse X 3-  
33 4 mice= 18-24 DRGs) and SN from 2-3 mice (2 SN per mouse x 2-3 mice = 4-6 SN) were pooled  
34 separately and used for one run. The collected nerve segments were cut into small pieces with  
35 microscissors and incubated in 1 ml collagenase (4mg/ml Worthington Biochemical, LS004176) and  
36 dispase (2mg/ml, Sigma-Aldrich, D4693) in PBS for 30-45 min at 37°C degrees in a 15mL conical  
37 tube. Tissues were gently triturated with a P1000 pipette every 10 min. Next, samples were rinsed in  
38 DMEM with 10% FBS and spun down at 650 g for 5 min. This step was repeated three times and the  
39 resulting pellet gently re-suspended in 1 mL of 27% Percoll (Sigma Aldrich, P4937) in PBS. Then 3 ml  
40 of 27% Percoll were added to bring the final volume to 4 ml. Samples were spun at 900g for 20 min in  
41 a clinical centrifuge (Beckman Coulter Allegra 6R). The top layers (with myelin and other debris) were  
42 carefully aspirated. The final 100 µl were resuspended in 1 ml of PBS with 2% FBS and filtered  
43 through a pre-washed 40 µm Falcon filter (Corning, 352340). Cells were pelleted at 650 g for 5 min at  
44 4°C. Cells were labeled with fixable viability dye (Thermo Fisher Scientific, 65086614), blocked with  
45 αCD16/32 (BD Pharmingen, 553141), and stained with fluorescent antibodies and isotype controls.  
46 Immune cells (CD45<sup>+</sup>) were further classified as myeloid (CD45<sup>+</sup>CD11b<sup>+</sup>), cDC (CD45<sup>+</sup>CD11b<sup>-</sup>  
47 CD11c<sup>+</sup>Ly6G<sup>-</sup>), MoDC (CD45<sup>+</sup>CD11b<sup>+</sup>Ly6G<sup>-</sup>CD11c<sup>+</sup>), GC (CD45<sup>+</sup>CD11b<sup>+</sup>Ly6G<sup>+</sup>CD11c<sup>-</sup>), and Mo/Mac  
48 (CD45<sup>+</sup>CD11b<sup>+</sup>Ly6G<sup>-</sup>CD11c<sup>-</sup>). Data were acquired using a FACSCanto II (BD Biosciences) flow  
49 cytometer and analyzed with FlowJo software (Treestar) as described previously (Baldwin et al.,  
50 2015).

51  
52 *Antibodies* - CD11b-PE-Cy7 (Thermo Fisher Scientific, 25-0112-82), Rat IgGk Isotype Control-PE-  
53 Cy7 (Thermo Fisher Scientific, 25-4031-82) CD45-e450 (Thermo Fisher Scientific, 48-0451-82), Rat  
54 IgG2b Isotype Control-e450 (Thermo Fisher Scientific, 48-4031-82), CD45.1-e450 (Biolegend,  
55 110721), Mouse IgG2ak Isotype Control-e450 (Biolegend, 400235), CD45.2-APC (Biolegend,  
56 109813), Mouse IgG2ak Isotype Control-APC (Biolegend, 400221), Ly6G-APC-Cy7 (BD Biosciences,  
57 560600), Rat IgG2a Isotype Control-APC-Cy7 (BD Biosciences, 552770), CD11c-PerCP-Cy5.5  
58 (Thermo Fisher Scientific, 45-0114-82), Arm Ham IgG Isotype Control-PerCP-Cy5.5 (Thermo Fisher

Scientific, 45-4888-80), Ly6C-FITC (BD Biosciences, 561085), Rat IgM Isotype Control-FITC (BD Biosciences, 553942). All antibodies were used at a working concentration of 1:100 except for CD11b (1:200).

*Statistics* - Statistical analysis was performed in GraphPad Prism (v7) using paired or un-paired 2-tailed Student's t test, or 1-way or 2-way ANOVA with correction for multiple comparisons with Tukey's post-hoc test, as indicated in the figure legends. A p value < 0.05 (\*) was considered significant. p < 0.01 (\*\*), p < 0.001 (\*\*\*), and p < 0.0001 (\*\*\*\*).

### **Transcriptomics analysis, bulk RNA-seq of DRGs and scRNA-seq of sciatic nerves**

For gene expression analysis of naïve and axotomized DRGs, we carried out bulk RNA sequencing of L3-L5 ganglia harvested from naïve mice (n=3), d1 (n=3), d3 (n=3), and d7 (n=3) following bilateral SNC. For each data point, 18 ganglia were collected from 3 mice, pooled, flash frozen and lysed in Trizol solution for RNA extraction (Chandran et al., 2016). RNA-sequencing was carried out using TrueSeq RiboZero gold (stranded) kit (Illumina). Libraries were indexed and sequenced over 2 lanes using HiSeq4000 (Illumina) with 75-bp paired end reads. Quality control (QC) was performed on base qualities and nucleotide composition of sequences, to identify potential problems in library preparation or sequencing. Sequence quality for the dataset described here was sufficient that no reads were trimmed or filtered before input to the alignment stage. Reads were aligned to the latest Mouse mm10 reference genome (GRCm38.75) using the STAR spliced read aligner (version 2.4.0). Average input read counts were 58.8M per sample (range 53.4M to 66.2M) and average percentage of uniquely aligned reads was 86.3% (range 83.8% to 88.0%). Raw reads were filtered for low expressed genes and normalized by variance stabilization transformation method. Unwanted variation was removed by RUVSeq (1.20.0) with k=1. Differentially expressed genes were identified using the bioconductor package limma (3.42.2) with FDR<0.1 and the resulting gene lists were used as input for Ingenuity pathway analysis (Qiagen). Weighted gene co-expression network analysis was conducted using WGCNA R-package (ver 1.69). Soft thresholding power of 18 was used to calculate network adjacency. CutHeight of 0.3 was used to merge similar co-expression modules. Enrichment analysis for gene set was performed with GSEA (ver 2.2.2) using MsigDB (ver 7.0). Normalized enrichment score (NES) was used to assess enrichment of gene sets.

### **Preparation of cells for scRNA-seq**

Mice were transcardially perfused with ice-cold PBS for 5 min to flush out all blood cells in circulation. The sciatic nerve trunk was harvested and a segment that contains the injury site and the distal nerve stump, up to the branch point of the tibial nerve, used for further processing. A minimum of 3 mice (6

nerve) was used to obtain sufficient cells for analysis using the 10x Genomics platform. The collected nerve segments were cut into small pieces with microscissors and incubated in 1 ml PBS supplemented with collagenase (4mg/ml Worthington Biochemical, LS004176), dispase (2mg/ml, Sigma-Aldrich, D4693), and actinomycin D (45  $\mu$ M, Sigma Aldrich, A1410) for 30-45 min at 37°C degrees in a 15mL conical tube. Tissues were gently triturated with a P1000 pipette every 10 min. Next, samples were rinsed in DMEM with 10% FBS and spun down at 650 g for 5 min before removing supernatant. The resulting pellet was gently re-suspended in 1 mL of 27% Percoll (Sigma Aldrich, P4937) in PBS. Then 3 ml of 27% Percoll were added to bring the final volume to 4 ml. Samples were spun at 900g for 20 min with no brake in a clinical centrifuge (Beckman Coulter Allegra 6R). The top layers (with myelin and other debris) were carefully aspirated. The final 100  $\mu$ l were resuspended in 1 ml of PBS with 2% FBS and filtered through a pre-washed 40  $\mu$ m Falcon filter (Corning, 352340) with an additional 5 ml of PBS with 2% FBS. Cells were pelleted at 650 g for 5 min at 4°C. The supernatant was removed and the cell pellet resuspended in 180  $\mu$ l of MACS buffer (Miltenyi, 130-091-376) diluted 1:20 in PBS (final bovine serum albumin [BSA] was 0.5%) and 10  $\mu$ l of myelin removal beads were added (Miltenyi, 30-096-731). To remove all myelin debris, cells were incubated with myelin depletion beads for 15 min at 4°C with intermitted tapping. Cells were rinsed in 5 ml of MACS buffer, gently inverted several times and spun at 300g for 10 min. Cells were separated from myelin beads using the MidiMACS separator (Miltenyi, 130-042-302) and LS columns (Miltenyi, 130-042-401). The flow through solution with the cells was centrifuged and the cells resuspended in 50  $\mu$ l of Hanks balanced salt solution (Gibco, 14025092) supplemented with 0.4% BSA (Fisher Scientific, BP1600). The cell number and live/dead ratio was determined using propidium iodine labeling and a hemocytometer.

### **10X Genomics Single Cell RNA-seq library preparation**

For encapsulation of single cells with microbeads into nanodroplets, the Chromium Next GEM Single Cell 3' GEM Library & Gel Bead Kit v3.1 and Chromium Next GEM Chip G Single Cell Kit were used. Approximately 12,000 cells in a final volume of 43  $\mu$ l were used for barcoding, using the 10X Genomics Chromium Controller. The library preparation of barcoded cDNAs was carried out in a bulk reaction, following instructions provided by the manufacturer. The NovaSeq Illumina 6000 (Advanced Genomics Core at the University of Michigan) was used with an S4 flowcell, yielding 1.05 Billion reads (7-11% of the flowcell) (Individual samples ranging from 290 to 424 million reads). NovaSeq control software version 1.6 and Real Time Analysis (RTA) software version 3.4.4 were used to generate binary base call (BCL) formatted files.

### **Data analysis**

28 Raw scRNAseq data were processed using the 10x Genomics CellRanger software version 3.1.0.  
29 The CellRanger “mkfastq” function was used for de-multiplexing and generating FASTQ files from raw  
30 BCLs. The CellRanger “count” function, with default settings was used with the mm10 reference  
31 supplied by 10x Genomics, to align reads and generate single cell feature counts. Per sample,  
32 approx. 5,800 cells with median genes per cell of 2,507 were obtained. CellRanger filtered cells and  
33 counts were used for downstream analysis in Seurat version 3.1.2 implemented in R version 3.6.2.  
34 Cells were excluded if they had fewer than 200 features, more than 7500, or the mitochondrial  
35 content was more than 25%. Reads from multiple samples were merged and normalized following a  
36 standard Seurat SCTransform integration pipeline (Hafemeister and Satija, 2019); mitochondrial  
37 mapping percentage was regressed out during the SCTransform normalization step. Principal  
38 component analysis was performed on the top 3000 variable genes and the top 30 principle  
39 components were used for downstream analysis. A K-nearest neighbor graph was produced using  
40 Euclidean distances. The Louvain algorithm was used with resolution set to .5 to group cells together.  
41 Non-linear dimensional reduction was done using UMAP. The top 100 genes for each cluster,  
42 determined by Seurat’s FindAllMarkers function and the Wilcoxon Rank Sum test, were submitted to  
43 version 11 of the string-db.org to determine functional enrichment; referred to as STRING analysis.  
44 To model developmental trajectories of cells that comprise the mononuclear phagocyte system  
45 (MPS), the Bioconductor package, slingshot version 1.4.0 was used. The integrated Seurat object  
46 was subset to include only MPS cells and slingshot was instructed to start from monocytes. The  
47 pseudo-time from the three slingshot constructed lineages were used in random regression forest to  
48 reveal the most influential genes, on pseudo-time. Random forests were implemented with the  
49 Ranger package of R from 1400 trees, 200 genes at each node, and the Gini index, “impurity”,  
50 measure for gene importance. The bulk RNA-seq and scRNA-seq data is available online in the  
51 Gene Expression Omnibus (GEO) database (GSE153762).

52  
53 Cell identities, as defined above, were saved for the 3d injured nerve. Single-cell transcriptomes from  
54 YFP.pos and YFP.neg macrophage populations identified in naïve peripheral nerve tissue (Wang et  
55 al., 2020), were downloaded and given the label Mac\_Naive. The log<sub>2</sub> transformed raw counts of the  
56 3d injured Mac1-5 and Mo as well as the Mac\_Naive cells were subjected to batch correction using  
57 the ComBat function from the Bioconductor “sva” package (Leek et al., 2012). Injured nerve Mo/Mac  
58 and naïve Mac made up the two batches and the following arguments were passed to ComBat:  
59 mod=NULL, par.prior=TRUE, mean.only=FALSE, prior.plots=FALSE. After batch correction each cell  
60 type and gene had a highly repeated minimum number near 0. To aid in plotting and determining  
61 “percent expressed” this value was replaced with 0. The average expression for each gene and each  
62 cell type was calculated for the purpose of making dotplots. Any cell type with more than 85% zeros

53 was not given a dot. The dots represent percent expressed by radius and average expression, scaled  
54 across cell type, by color.

55



## References

- 56  
57 Abe, N., and Cavalli, V. (2008). Nerve injury signaling. *Curr Opin Neurobiol* 18, 276-283.
- 58 Accolla, R.S., Ramia, E., Tedeschi, A., and Forlani, G. (2019). CIITA-Driven MHC Class II Expressing Tumor  
59 Cells as Antigen Presenting Cell Performers: Toward the Construction of an Optimal Anti-tumor Vaccine. *Front*  
60 *Immunol* 10, 1806.
- 61 Altmann, C., Vasic, V., Hardt, S., Heidler, J., Haussler, A., Wittig, I., Schmidt, M.H.H., and Tegeder, I. (2016).  
62 Progranulin promotes peripheral nerve regeneration and reinnervation: role of notch signaling. *Mol*  
63 *Neurodegener* 11, 69.
- 64 Arthur-Farraj, P.J., Latouche, M., Wilton, D.K., Quintes, S., Chabrol, E., Banerjee, A., Woodhoo, A., Jenkins,  
65 B., Rahman, M., Turmaine, M., *et al.* (2012). c-Jun reprograms Schwann cells of injured nerves to generate a  
66 repair cell essential for regeneration. *Neuron* 75, 633-647.
- 67 Atwal, J.K., Pinkston-Gosse, J., Syken, J., Stawicki, S., Wu, Y., Shatz, C., and Tessier-Lavigne, M. (2008).  
68 PirB is a functional receptor for myelin inhibitors of axonal regeneration. *Science* 322, 967-970.
- 69 Baldwin, K.T., Carbajal, K.S., Segal, B.M., and Giger, R.J. (2015). Neuroinflammation triggered by beta-  
70 glucan/dectin-1 signaling enables CNS axon regeneration. *Proc Natl Acad Sci U S A* 112, 2581-2586.
- 71 Bandala-Sanchez, E., N, G.B., Goddard-Borger, E.D., Ngui, K., Naselli, G., Stone, N.L., Neale, A.M., Pearce,  
72 L.A., Wardak, A., Czabotar, P., *et al.* (2018). CD52 glycan binds the proinflammatory B box of HMGB1 to  
73 engage the Siglec-10 receptor and suppress human T cell function. *Proc Natl Acad Sci U S A* 115, 7783-7788.
- 74 Barrette, B., Hebert, M.A., Filali, M., Lafortune, K., Vallieres, N., Gowing, G., Julien, J.P., and Lacroix, S.  
75 (2008). Requirement of myeloid cells for axon regeneration. *J Neurosci* 28, 9363-9376.
- 76 Be'eri, H., Reichert, F., Saada, A., and Rotshenker, S. (1998). The cytokine network of wallerian degeneration:  
77 IL-10 and GM-CSF. *Eur J Neurosci* 10, 2707-2713.
- 78 Blesch, A., Lu, P., Tsukada, S., Alto, L.T., Roet, K., Coppola, G., Geschwind, D., and Tuszynski, M.H. (2012).  
79 Conditioning lesions before or after spinal cord injury recruit broad genetic mechanisms that sustain axonal  
80 regeneration: superiority to camp-mediated effects. *Exp Neurol* 235, 162-173.
- 81 Boada-Romero, E., Martinez, J., Heckmann, B.L., and Green, D.R. (2020). The clearance of dead cells by  
82 efferocytosis. *Nat Rev Mol Cell Biol*.
- 83 Bombeiro, A.L., Pereira, B.T.N., and de Oliveira, A.L.R. (2018). Granulocyte-macrophage colony-stimulating  
84 factor improves mouse peripheral nerve regeneration following sciatic nerve crush. *Eur J Neurosci* 48, 2152-  
85 2164.
- 86 Bortolotti, P., Faure, E., and Kipnis, E. (2018). Inflammasomes in Tissue Damages and Immune Disorders After  
87 Trauma. *Front Immunol* 9, 1900.
- 88 Bray, E.R., Noga, M., Thakor, K., Wang, Y., Lemmon, V.P., Park, K.K., and Tsoulfas, P. (2017). 3D  
89 Visualization of Individual Regenerating Retinal Ganglion Cell Axons Reveals Surprisingly Complex Growth  
90 Paths. *eNeuro* 4.
- 91 Brosius Lutz, A., Chung, W.S., Sloan, S.A., Carson, G.A., Zhou, L., Lovelett, E., Posada, S., Zuchero, J.B., and  
92 Barres, B.A. (2017). Schwann cells use TAM receptor-mediated phagocytosis in addition to autophagy to clear  
93 myelin in a mouse model of nerve injury. *Proc Natl Acad Sci U S A* 114, E8072-E8080.
- 94 Cafferty, W.B., Gardiner, N.J., Das, P., Qiu, J., McMahon, S.B., and Thompson, S.W. (2004). Conditioning  
95 injury-induced spinal axon regeneration fails in interleukin-6 knock-out mice. *J Neurosci* 24, 4432-4443.
- 96 Cane, S., Ugel, S., Trovato, R., Marigo, I., De Sanctis, F., Sartoris, S., and Bronte, V. (2019). The Endless Saga  
97 of Monocyte Diversity. *Front Immunol* 10, 1786.
- 98 Carr, M.J., Toma, J.S., Johnston, A.P.W., Steadman, P.E., Yuzwa, S.A., Mahmud, N., Frankland, P.W., Kaplan,  
99 D.R., and Miller, F.D. (2019). Mesenchymal Precursor Cells in Adult Nerves Contribute to Mammalian Tissue  
100 Repair and Regeneration. *Cell Stem Cell* 24, 240-256 e249.
- 101 Chandran, V., Coppola, G., Nawabi, H., Omura, T., Versano, R., Huebner, E.A., Zhang, A., Costigan, M.,  
102 Yekkirala, A., Barrett, L., *et al.* (2016). A Systems-Level Analysis of the Peripheral Nerve Intrinsic Axonal  
103 Growth Program. *Neuron* 89, 956-970.
- 104 Choi, J.K., Park, S.Y., Kim, K.H., Park, S.R., Lee, S.G., and Choi, B.H. (2014). GM-CSF reduces expression of  
105 chondroitin sulfate proteoglycan (CSPG) core proteins in TGF-beta-treated primary astrocytes. *BMB Rep* 47,  
106 679-684.

- 17 Clements, M.P., Byrne, E., Camarillo Guerrero, L.F., Cattin, A.L., Zakka, L., Ashraf, A., Burden, J.J.,  
18 Khadayate, S., Lloyd, A.C., Marguerat, S., *et al.* (2017). The Wound Microenvironment Reprograms Schwann  
19 Cells to Invasive Mesenchymal-like Cells to Drive Peripheral Nerve Regeneration. *Neuron* 96, 98-114 e117.
- 20 DeFrancesco-Lisowitz, A., Lindborg, J.A., Niemi, J.P., and Zigmond, R.E. (2015). The neuroimmunology of  
21 degeneration and regeneration in the peripheral nervous system. *Neuroscience* 302, 174-203.
- 22 Donatien, P., Anand, U., Yiangou, Y., Sinisi, M., Fox, M., MacQuillan, A., Quick, T., Korchev, Y.E., and  
23 Anand, P. (2018). Granulocyte-macrophage colony-stimulating factor receptor expression in clinical pain  
24 disorder tissues and role in neuronal sensitization. *Pain Rep* 3, e676.
- 25 Doran, A.C., Yurdagul, A., Jr., and Tabas, I. (2020). Efferocytosis in health and disease. *Nat Rev Immunol* 20,  
26 254-267.
- 27 Eming, S.A., Wynn, T.A., and Martin, P. (2017). Inflammation and metabolism in tissue repair and  
28 regeneration. *Science* 356, 1026-1030.
- 29 Erriah, M., Pabreja, K., Fricker, M., Baines, K.J., Donnelly, L.E., Bylund, J., Karlsson, A., and Simpson, J.L.  
30 (2019). Galectin-3 enhances monocyte-derived macrophage efferocytosis of apoptotic granulocytes in asthma.  
31 *Respir Res* 20, 1.
- 32 Foldi, J., Shang, Y., Zhao, B., Ivashkiv, L.B., and Hu, X. (2016). RBP-J is required for M2 macrophage  
33 polarization in response to chitin and mediates expression of a subset of M2 genes. *Protein Cell* 7, 201-209.
- 34 Frank, D., and Vince, J.E. (2019). Pyroptosis versus necroptosis: similarities, differences, and crosstalk. *Cell*  
35 *Death Differ* 26, 99-114.
- 36 Franzen, R., Bouhy, D., and Schoenen, J. (2004). Nervous system injury: focus on the inflammatory cytokine  
37 'granulocyte-macrophage colony stimulating factor'. *Neurosci Lett* 361, 76-78.
- 38 Geschwind, D.H., and Konopka, G. (2009). Neuroscience in the era of functional genomics and systems  
39 biology. *Nature* 461, 908-915.
- 40 Grajchen, E., Hendriks, J.J.A., and Bogie, J.F.J. (2018). The physiology of foamy phagocytes in multiple  
41 sclerosis. *Acta Neuropathol Commun* 6, 124.
- 42 Greenlee-Wacker, M.C. (2016). Clearance of apoptotic neutrophils and resolution of inflammation. *Immunol*  
43 *Rev* 273, 357-370.
- 44 Guan, Z., Kuhn, J.A., Wang, X., Colquitt, B., Solorzano, C., Vaman, S., Guan, A.K., Evans-Reinsch, Z., Braz,  
45 J., Devor, M., *et al.* (2016). Injured sensory neuron-derived CSF1 induces microglial proliferation and DAP12-  
46 dependent pain. *Nat Neurosci* 19, 94-101.
- 47 Gugala, Z., Olmsted-Davis, E.A., Xiong, Y., Davis, E.L., and Davis, A.R. (2018). Trauma-Induced Heterotopic  
48 Ossification Regulates the Blood-Nerve Barrier. *Front Neurol* 9, 408.
- 49 Guimaraes, R.M., Davoli-Ferreira, M., Fonseca, M.M., Damasceno, L.E.A., Santa-Cecilia, F.V., Kusuda, R.,  
50 Menezes, G.B., Cunha, F.Q., Alves-Filho, J.C., and Cunha, T.M. (2019). Frontline Science: Blood-circulating  
51 leukocytes fail to infiltrate the spinal cord parenchyma after spared nerve injury. *J Leukoc Biol* 106, 541-551.
- 52 Hafemeister, C., and Satija, R. (2019). Normalization and variance stabilization of single-cell RNA-seq data  
53 using regularized negative binomial regression. *Genome Biol* 20, 296.
- 54 Haidar, B., Kiss, R.S., Sarov-Blat, L., Brunet, R., Harder, C., McPherson, R., and Marcel, Y.L. (2006).  
55 Cathepsin D, a lysosomal protease, regulates ABCA1-mediated lipid efflux. *J Biol Chem* 281, 39971-39981.
- 56 Hamilton, J.A. (2019). GM-CSF-Dependent Inflammatory Pathways. *Front Immunol* 10, 2055.
- 57 Hansen, G., Hercus, T.R., McClure, B.J., Stomski, F.C., Dottore, M., Powell, J., Ramshaw, H., Woodcock,  
58 J.M., Xu, Y., Guthridge, M., *et al.* (2008). The structure of the GM-CSF receptor complex reveals a distinct  
59 mode of cytokine receptor activation. *Cell* 134, 496-507.
- 60 Henson, P.M. (2017). Cell Removal: Efferocytosis. *Annu Rev Cell Dev Biol* 33, 127-144.
- 61 Hoke, A., Cheng, C., and Zochodne, D.W. (2000). Expression of glial cell line-derived neurotrophic factor  
62 family of growth factors in peripheral nerve injury in rats. *Neuroreport* 11, 1651-1654.
- 63 Hollis, E.R., 2nd, Ishiko, N., Tolentino, K., Doherty, E., Rodriguez, M.J., Calcutt, N.A., and Zou, Y. (2015). A  
64 novel and robust conditioning lesion induced by ethidium bromide. *Exp Neurol* 265, 30-39.
- 65 Horn, K.P., Busch, S.A., Hawthorne, A.L., van Rooijen, N., and Silver, J. (2008). Another barrier to  
66 regeneration in the CNS: activated macrophages induce extensive retraction of dystrophic axons through direct  
67 physical interactions. *J Neurosci* 28, 9330-9341.

- 58 Hu, P., Bembrick, A.L., Keay, K.A., and McLachlan, E.M. (2007). Immune cell involvement in dorsal root  
59 ganglia and spinal cord after chronic constriction or transection of the rat sciatic nerve. *Brain Behav Immun* 21,  
60 599-616.
- 61 Hu, P., and McLachlan, E.M. (2003). Distinct functional types of macrophage in dorsal root ganglia and spinal  
62 nerves proximal to sciatic and spinal nerve transections in the rat. *Exp Neurol* 184, 590-605.
- 63 Huang, X., Kim, J.M., Kong, T.H., Park, S.R., Ha, Y., Kim, M.H., Park, H., Yoon, S.H., Park, H.C., Park, J.O.,  
64 *et al.* (2009). GM-CSF inhibits glial scar formation and shows long-term protective effect after spinal cord  
65 injury. *J Neurol Sci* 277, 87-97.
- 66 Ijaz, T., Tilton, R.G., and Brasier, A.R. (2016). Cytokine amplification and macrophage effector functions in  
67 aortic inflammation and abdominal aortic aneurysm formation. *J Thorac Dis* 8, E746-754.
- 68 Ippolito, G.C., Dekker, J.D., Wang, Y.H., Lee, B.K., Shaffer, A.L., 3rd, Lin, J., Wall, J.K., Lee, B.S., Staudt,  
69 L.M., Liu, Y.J., *et al.* (2014). Dendritic cell fate is determined by BCL11A. *Proc Natl Acad Sci U S A* 111,  
70 E998-1006.
- 71 Izawa, K., Isobe, M., Matsukawa, T., Ito, S., Maehara, A., Takahashi, M., Yamanishi, Y., Kaitani, A., Oki, T.,  
72 Okumura, K., *et al.* (2014). Sphingomyelin and ceramide are physiological ligands for human LMIR3/CD300f,  
73 inhibiting FcεRI-mediated mast cell activation. *J Allergy Clin Immunol* 133, 270-273 e271-277.
- 74 Kalinski, A.L., Kar, A.N., Craver, J., Tosolini, A.P., Sleight, J.N., Lee, S.J., Hawthorne, A., Brito-Vargas, P.,  
75 Miller-Randolph, S., Passino, R., *et al.* (2019). Deacetylation of Miro1 by HDAC6 blocks mitochondrial  
76 transport and mediates axon growth inhibition. *J Cell Biol* 218, 1871-1890.
- 77 Katzenelenbogen, Y., Sheban, F., Yalin, A., Yofe, I., Svetlichnyy, D., Jaitin, D.A., Bornstein, C., Moshe, A.,  
78 Keren-Shaul, H., Cohen, M., *et al.* (2020). Coupled scRNA-Seq and Intracellular Protein Activity Reveal an  
79 Immunosuppressive Role of TREM2 in Cancer. *Cell* 182, 872-885 e819.
- 80 Kawano, M., and Nagata, S. (2018). Efferocytosis and autoimmune disease. *Int Immunol* 30, 551-558.
- 81 Kim, C.F., and Moalem-Taylor, G. (2011). Detailed characterization of neuro-immune responses following  
82 neuropathic injury in mice. *Brain Res* 1405, 95-108.
- 83 Kim, H. (2017). The transcription factor MafB promotes anti-inflammatory M2 polarization and cholesterol  
84 efflux in macrophages. *Sci Rep* 7, 7591.
- 85 King, I.L., Dickendersher, T.L., and Segal, B.M. (2009). Circulating Ly-6C<sup>+</sup> myeloid precursors migrate to the  
86 CNS and play a pathogenic role during autoimmune demyelinating disease. *Blood* 113, 3190-3197.
- 87 Klein, D., and Martini, R. (2016). Myelin and macrophages in the PNS: An intimate relationship in trauma and  
88 disease. *Brain Res* 1641, 130-138.
- 89 Korns, D., Frasch, S.C., Fernandez-Boyanapalli, R., Henson, P.M., and Bratton, D.L. (2011). Modulation of  
90 macrophage efferocytosis in inflammation. *Front Immunol* 2, 57.
- 91 Kourtzelis, I., Hajishengallis, G., and Chavakis, T. (2020). Phagocytosis of Apoptotic Cells in Resolution of  
92 Inflammation. *Front Immunol* 11, 553.
- 93 Kuhlmann, T., Wendling, U., Nolte, C., Zipp, F., Maruschak, B., Stadelmann, C., Siebert, H., and Bruck, W.  
94 (2002). Differential regulation of myelin phagocytosis by macrophages/microglia, involvement of target myelin,  
95 Fc receptors and activation by intravenous immunoglobulins. *J Neurosci Res* 67, 185-190.
- 96 Kumamaru, H., Lu, P., Rosenzweig, E.S., and Tuszyński, M.H. (2018). Activation of Intrinsic Growth State  
97 Enhances Host Axonal Regeneration into Neural Progenitor Cell Grafts. *Stem Cell Reports* 11, 861-868.
- 98 Kwon, M.J., Shin, H.Y., Cui, Y., Kim, H., Thi, A.H., Choi, J.Y., Kim, E.Y., Hwang, D.H., and Kim, B.G.  
99 (2015). CCL2 Mediates Neuron-Macrophage Interactions to Drive Proregenerative Macrophage Activation  
100 Following Preconditioning Injury. *J Neurosci* 35, 15934-15947.
- 101 Leek, J.T., Johnson, W.E., Parker, H.S., Jaffe, A.E., and Storey, J.D. (2012). The sva package for removing  
102 batch effects and other unwanted variation in high-throughput experiments. *Bioinformatics* 28, 882-883.
- 103 Legacy, J., Hanea, S., Theoret, J., and Smith, P.D. (2013). Granulocyte macrophage colony-stimulating factor  
104 promotes regeneration of retinal ganglion cells in vitro through a mammalian target of rapamycin-dependent  
105 mechanism. *J Neurosci Res* 91, 771-779.
- 106 Leonhard, C., Muller, M., Hickey, W.F., Ringelstein, E.B., and Kiefer, R. (2002). Lesion response of long-term  
107 and recently immigrated resident endoneurial macrophages in peripheral nerve explant cultures from bone  
108 marrow chimeric mice. *Eur J Neurosci* 16, 1654-1660.

- 19 Lindborg, J.A., Mack, M., and Zigmond, R.E. (2017). Neutrophils Are Critical for Myelin Removal in a  
20 Peripheral Nerve Injury Model of Wallerian Degeneration. *J Neurosci* 37, 10258-10277.
- 21 Liu, M., Tong, Z., Ding, C., Luo, F., Wu, S., Wu, C., Albeituni, S., He, L., Hu, X., Tieri, D., *et al.* (2020).  
22 Transcription factor c-Maf is a checkpoint that programs macrophages in lung cancer. *J Clin Invest* 130, 2081-  
23 2096.
- 24 Lu, X., and Richardson, P.M. (1991). Inflammation near the nerve cell body enhances axonal regeneration. *J*  
25 *Neurosci* 11, 972-978.
- 26 Martini, R., Fischer, S., Lopez-Vales, R., and David, S. (2008). Interactions between Schwann cells and  
27 macrophages in injury and inherited demyelinating disease. *Glia* 56, 1566-1577.
- 28 McLachlan, E.M., and Hu, P. (2014). Inflammation in dorsal root ganglia after peripheral nerve injury: effects  
29 of the sympathetic innervation. *Auton Neurosci* 182, 108-117.
- 30 McQuarrie, I.G., Grafstein, B., and Gershon, M.D. (1977). Axonal regeneration in the rat sciatic nerve: effect of  
31 a conditioning lesion and of dbcAMP. *Brain Res* 132, 443-453.
- 32 Meyer, I.S., Jungmann, A., Dieterich, C., Zhang, M., Lasitschka, F., Werkmeister, S., Haas, J., Muller, O.J.,  
33 Boutros, M., Nahrendorf, M., *et al.* (2017). The cardiac microenvironment uses non-canonical WNT signaling  
34 to activate monocytes after myocardial infarction. *EMBO Mol Med* 9, 1279-1293.
- 35 Mirski, R., Reichert, F., Klar, A., and Rotshenker, S. (2003). Granulocyte macrophage colony stimulating factor  
36 (GM-CSF) activity is regulated by a GM-CSF binding molecule in Wallerian degeneration following injury to  
37 peripheral nerve axons. *J Neuroimmunol* 140, 88-96.
- 38 Muller, M., Leonhard, C., Krauthausen, M., Wacker, K., and Kiefer, R. (2010). On the longevity of resident  
39 endoneurial macrophages in the peripheral nervous system: a study of physiological macrophage turnover in  
40 bone marrow chimeric mice. *J Peripher Nerv Syst* 15, 357-365.
- 41 Neumann, S., and Woolf, C.J. (1999). Regeneration of dorsal column fibers into and beyond the lesion site  
42 following adult spinal cord injury. *Neuron* 23, 83-91.
- 43 Niemi, J.P., DeFrancesco-Lisowitz, A., Cregg, J.M., Howarth, M., and Zigmond, R.E. (2016). Overexpression  
44 of the monocyte chemokine CCL2 in dorsal root ganglion neurons causes a conditioning-like increase in neurite  
45 outgrowth and does so via a STAT3 dependent mechanism. *Exp Neurol* 275 Pt 1, 25-37.
- 46 Niemi, J.P., DeFrancesco-Lisowitz, A., Roldan-Hernandez, L., Lindborg, J.A., Mandell, D., and Zigmond, R.E.  
47 (2013). A critical role for macrophages near axotomized neuronal cell bodies in stimulating nerve regeneration.  
48 *J Neurosci* 33, 16236-16248.
- 49 Ortega-Gomez, A., Perretti, M., and Soehnlein, O. (2013). Resolution of inflammation: an integrated view.  
50 *EMBO Mol Med* 5, 661-674.
- 51 Perry, V.H., Brown, M.C., and Gordon, S. (1987). The macrophage response to central and peripheral nerve  
52 injury. A possible role for macrophages in regeneration. *J Exp Med* 165, 1218-1223.
- 53 Poplawski, G.H.D., Kawaguchi, R., Van Niekerk, E., Lu, P., Mehta, N., Canete, P., Lie, R., Dragatsis, I.,  
54 Meves, J.M., Zheng, B., *et al.* (2020). Injured adult neurons regress to an embryonic transcriptional growth  
55 state. *Nature* 581, 77-82.
- 56 Quenum Zangbede, F.O., Chauhan, A., Sharma, J., and Mishra, B.B. (2018). Galectin-3 in M2 Macrophages  
57 Plays a Protective Role in Resolution of Neuropathology in Brain Parasitic Infection by Regulating Neutrophil  
58 Turnover. *J Neurosci* 38, 6737-6750.
- 59 Rashidi, M., Bandala-Sanchez, E., Lawlor, K.E., Zhang, Y., Neale, A.M., Vijayaraj, S.L., O'Donoghue, R.,  
60 Wentworth, J.M., Adams, T.E., Vince, J.E., *et al.* (2018). CD52 inhibits Toll-like receptor activation of NF-  
61 kappaB and triggers apoptosis to suppress inflammation. *Cell Death Differ* 25, 392-405.
- 62 Renier, N., Wu, Z., Simon, D.J., Yang, J., Ariel, P., and Tessier-Lavigne, M. (2014). iDISCO: a simple, rapid  
63 method to immunolabel large tissue samples for volume imaging. *Cell* 159, 896-910.
- 64 Richard, L., Topilko, P., Magy, L., Decouvellaere, A.V., Charnay, P., Funalot, B., and Vallat, J.M. (2012).  
65 Endoneurial fibroblast-like cells. *J Neuropathol Exp Neurol* 71, 938-947.
- 66 Richardson, P.M., and Issa, V.M. (1984). Peripheral injury enhances central regeneration of primary sensory  
67 neurones. *Nature* 309, 791-793.
- 68 Richardson, P.M., and Lu, X. (1994). Inflammation and axonal regeneration. *J Neurol* 242, S57-60.
- 69 Richardson, P.M., Miao, T., Wu, D., Zhang, Y., Yeh, J., and Bo, X. (2009). Responses of the nerve cell body to  
70 axotomy. *Neurosurgery* 65, A74-79.

- 71 Robak, L.A., Venkatesh, K., Lee, H., Raiker, S.J., Duan, Y., Lee-Osbourne, J., Hofer, T., Mage, R.G., Rader,  
72 C., and Giger, R.J. (2009). Molecular basis of the interactions of the Nogo-66 receptor and its homolog NgR2  
73 with myelin-associated glycoprotein: development of NgROMNI-Fc, a novel antagonist of CNS myelin  
74 inhibition. *J Neurosci* 29, 5768-5783.
- 75 Rotshenker, S. (2009). The role of Galectin-3/MAC-2 in the activation of the innate-immune function of  
76 phagocytosis in microglia in injury and disease. *J Mol Neurosci* 39, 99-103.
- 77 Rozenberg, P., Reichman, H., Moshkovits, I., and Munitz, A. (2018). CD300 family receptors regulate  
78 eosinophil survival, chemotaxis, and effector functions. *J Leukoc Biol* 104, 21-29.
- 79 Saada, A., Reichert, F., and Rotshenker, S. (1996). Granulocyte macrophage colony stimulating factor produced  
80 in lesioned peripheral nerves induces the up-regulation of cell surface expression of MAC-2 by macrophages  
81 and Schwann cells. *J Cell Biol* 133, 159-167.
- 82 Salegio, E.A., Pollard, A.N., Smith, M., and Zhou, X.F. (2011). Macrophage presence is essential for the  
83 regeneration of ascending afferent fibres following a conditioning sciatic nerve lesion in adult rats. *BMC*  
84 *Neurosci* 12, 11.
- 85 Sleigh, J.N., Weir, G.A., and Schiavo, G. (2016). A simple, step-by-step dissection protocol for the rapid  
86 isolation of mouse dorsal root ganglia. *BMC Res Notes* 9, 82.
- 87 Stiles, T.L., Dickendesher, T.L., Gaultier, A., Fernandez-Castaneda, A., Mantuano, E., Giger, R.J., and Gonias,  
88 S.L. (2013). LDL receptor-related protein-1 is a sialic-acid-independent receptor for myelin-associated  
89 glycoprotein that functions in neurite outgrowth inhibition by MAG and CNS myelin. *J Cell Sci* 126, 209-220.
- 90 Street, K., Risso, D., Fletcher, R.B., Das, D., Ngai, J., Yosef, N., Purdom, E., and Dudoit, S. (2018). Slingshot:  
91 cell lineage and pseudotime inference for single-cell transcriptomics. *BMC Genomics* 19, 477.
- 92 van der Touw, W., Chen, H.M., Pan, P.Y., and Chen, S.H. (2017). LILRB receptor-mediated regulation of  
93 myeloid cell maturation and function. *Cancer Immunol Immunother* 66, 1079-1087.
- 94 Vannella, K.M., and Wynn, T.A. (2017). Mechanisms of Organ Injury and Repair by Macrophages. *Annu Rev*  
95 *Physiol* 79, 593-617.
- 96 Viaud, M., Ivanov, S., Vujic, N., Duta-Mare, M., Aira, L.E., Barouillet, T., Garcia, E., Orange, F., Dugail, I.,  
97 Hainault, I., *et al.* (2018). Lysosomal Cholesterol Hydrolysis Couples Efferocytosis to Anti-Inflammatory  
98 Oxysterol Production. *Circ Res* 122, 1369-1384.
- 99 Vogel, D.Y., Kooij, G., Heijnen, P.D., Breur, M., Peferoen, L.A., van der Valk, P., de Vries, H.E., Amor, S.,  
100 and Dijkstra, C.D. (2015). GM-CSF promotes migration of human monocytes across the blood brain barrier.  
101 *Eur J Immunol* 45, 1808-1819.
- 102 Voss, O.H., Tian, L., Murakami, Y., Coligan, J.E., and Krzewski, K. (2015). Emerging role of CD300 receptors  
103 in regulating myeloid cell efferocytosis. *Mol Cell Oncol* 2, e964625.
- 104 Wang, P.L., Yim, A.K.Y., Kim, K.W., Avey, D., Czepielewski, R.S., Colonna, M., Milbrandt, J., and Randolph,  
105 G.J. (2020). Peripheral nerve resident macrophages share tissue-specific programming and features of activated  
106 microglia. *Nat Commun* 11, 2552.
- 107 Wang, Q., Zhang, S., Liu, T., Wang, H., Liu, K., Wang, Q., and Zeng, W. (2018). Sarm1/Myd88-5 Regulates  
108 Neuronal Intrinsic Immune Response to Traumatic Axonal Injuries. *Cell Rep* 23, 716-724.
- 109 Wicks, I.P., and Roberts, A.W. (2016). Targeting GM-CSF in inflammatory diseases. *Nat Rev Rheumatol* 12,  
110 37-48.
- 111 Wolbert, J., Li, X., Heming, M., Mausberg, A.K., Akkermann, D., Frydrychowicz, C., Fledrich, R., Groeneweg,  
112 L., Schulz, C., Stettner, M., *et al.* (2020). Redefining the heterogeneity of peripheral nerve cells in health and  
113 autoimmunity. *Proc Natl Acad Sci U S A* 117, 9466-9476.
- 114 Wright, M.C., Mi, R., Connor, E., Reed, N., Vyas, A., Alspalter, M., Coppola, G., Geschwind, D.H., Brushart,  
115 T.M., and Hoke, A. (2014). Novel roles for osteopontin and clusterin in peripheral motor and sensory axon  
116 regeneration. *J Neurosci* 34, 1689-1700.
- 117 Wright, R.D., Souza, P.R., Flak, M.B., Thedchanamoorthy, P., Norling, L.V., and Cooper, D. (2017). Galectin-  
118 3-null mice display defective neutrophil clearance during acute inflammation. *J Leukoc Biol* 101, 717-726.
- 119 Wu, N., Li, R.Q., and Li, L. (2018). SOAT1 deficiency attenuates atherosclerosis by regulating inflammation  
120 and cholesterol transportation via HO-1 pathway. *Biochem Biophys Res Commun* 501, 343-350.

- 21 Ydens, E., Amann, L., Asselbergh, B., Scott, C.L., Martens, L., Sichien, D., Mossad, O., Blank, T., De Prijck,  
22 S., Low, D., *et al.* (2020). Profiling peripheral nerve macrophages reveals two macrophage subsets with distinct  
23 localization, transcriptome and response to injury. *Nat Neurosci*.
- 24 Yoon, C., Van Niekerk, E.A., Henry, K., Ishikawa, T., Orita, S., Tuszynski, M.H., and Campana, W.M. (2013).  
25 Low-density lipoprotein receptor-related protein 1 (LRP1)-dependent cell signaling promotes axonal  
26 regeneration. *J Biol Chem* 288, 26557-26568.
- 27 Yoon, Y.S., Kim, S.Y., Kim, M.J., Lim, J.H., Cho, M.S., and Kang, J.L. (2015). PPARgamma activation  
28 following apoptotic cell instillation promotes resolution of lung inflammation and fibrosis via regulation of  
29 efferocytosis and proresolving cytokines. *Mucosal Immunol* 8, 1031-1046.
- 30 Yu, X., Liu, H., Hamel, K.A., Morvan, M.G., Yu, S., Leff, J., Guan, Z., Braz, J.M., and Basbaum, A.I. (2020).  
31 Dorsal root ganglion macrophages contribute to both the initiation and persistence of neuropathic pain. *Nat*  
32 *Commun* 11, 264.
- 33 Yvan-Charvet, L., Pagler, T.A., Seimon, T.A., Thorp, E., Welch, C.L., Witztum, J.L., Tabas, I., and Tall, A.R.  
34 (2010). ABCA1 and ABCG1 protect against oxidative stress-induced macrophage apoptosis during  
35 efferocytosis. *Circ Res* 106, 1861-1869.
- 36 Zhang, B., and Horvath, S. (2005). Ridge regression based hybrid genetic algorithms for multi-locus  
37 quantitative trait mapping. *Int J Bioinform Res Appl* 1, 261-272.
- 38 Zhang, J., Shi, X.Q., Echeverry, S., Mogil, J.S., De Koninck, Y., and Rivest, S. (2007). Expression of CCR2 in  
39 both resident and bone marrow-derived microglia plays a critical role in neuropathic pain. *J Neurosci* 27,  
40 12396-12406.
- 41 Zhou, L., Zhuo, H., Ouyang, H., Liu, Y., Yuan, F., Sun, L., Liu, F., and Liu, H. (2017). Glycoprotein non-  
42 metastatic melanoma protein b (Gpnmb) is highly expressed in macrophages of acute injured kidney and  
43 promotes M2 macrophages polarization. *Cell Immunol* 316, 53-60.
- 44 Zigmond, R.E., and Echevarria, F.D. (2019). Macrophage biology in the peripheral nervous system after injury.  
45 *Prog Neurobiol* 173, 102-121.

46  
47

## Figure legends

### Figure 1

#### Immune cell profiles in the injured murine sciatic nerve.

**A.** Anatomy of lumbar spinal cord and DRGs connected to the sciatic nerve. The location of the crush site within the nerve trunk and the tissue segment collected for flow cytometry (red bracket) are shown. **B.** Quantification of live, CD45<sup>+</sup> leukocytes, normalized per sciatic nerve trunk. Flow cytometry of nerve tissue collected from naïve mice (n= 10 biological replicates, with 6 nerves per replicate), day 1 (d1) post-SNC (n= 7), d3 (n= 12), and d7 (n= 12). **C.** Quantification of granulocytes (CD45<sup>+</sup>, CD11b<sup>+</sup>, Ly6G<sup>+</sup>) per nerve trunk. **D.** Quantification of Mo/Mac (CD45<sup>+</sup>, CD11b<sup>+</sup>, CD11c<sup>-</sup>, Ly6G<sup>-</sup>) per nerve trunk. **E.** Quantification of MoDC (CD45<sup>+</sup>, CD11b<sup>+</sup>, CD11c<sup>+</sup>, Ly6G<sup>-</sup>) per nerve trunk. **F.** Quantification of cDC (CD45<sup>+</sup>, CD11b<sup>-</sup>, CD11c<sup>+</sup>, Ly6G<sup>-</sup>) per nerve trunk. **G.** Quantification of lymphocytes (CD45<sup>+</sup>, CD11b<sup>-</sup>) per nerve trunk. **H.** Composition of CD45<sup>+</sup> leukocytes in the nerve trunk at different post-injury time points. Flow data are represented as mean cell number  $\pm$  SEM. Statistical analysis was performed in GraphPad Prism (v7) using 1-way or 2-way ANOVA with correction for multiple comparisons with Tukey's post-hoc test. For B-G, unpaired two-tailed t-test with Welch's correction. A p value < 0.05 (\*) was considered significant. p < 0.01 (\*\*), p < 0.001 (\*\*\*), and p < 0.0001 (\*\*\*\*).

### Figure 2

#### Immune cell profiles in axotomized DRGs

**A.** Representative images of L4 DRG cross sections from naïve mice, d1, d3, and d7 post-SNC. Macrophages were stained with anti-Iba1 and anti-F4/80. Neurons were stained with anti-NFH. Scale bar, 50  $\mu$ m. **B.** Quantification of granulocytes per DRG detected by flow cytometry. For flow cytometry of DRGs, naïve mice (n= 14 biological replicates), d1 (n= 3), d3 (n= 5), and d7 (n= 12) post-SNC mice were used. Granulocytes (CD45<sup>+</sup>, CD11b<sup>+</sup>, Ly6G<sup>+</sup>) per DRG are shown. **C.** Quantification of Mo/Mac (CD45<sup>+</sup>, CD11b<sup>+</sup>, CD11c<sup>-</sup>, Ly6G<sup>-</sup>) per DRG. **D.** Quantification of MoDC (CD45<sup>+</sup>, CD11b<sup>+</sup>, CD11c<sup>+</sup>, Ly6G<sup>-</sup>) per DRG. **E.** Quantification of cDC (CD45<sup>+</sup>, CD11b<sup>-</sup>, CD11c<sup>+</sup>, Ly6G<sup>-</sup>) per DRG. **F.** Quantification of lymphocytes (CD45<sup>+</sup>, CD11b<sup>-</sup>) per DRG. **G.** Composition of CD45<sup>+</sup> leukocytes in lumbar DRGs identified by flow cytometry. Flow data are represented as mean cell number  $\pm$  SEM. Each data point represents L3-L5 DRGs pooled from 3-4 animals (18-24 DRGs), biological replicates, n= 3-14. Statistical analysis was performed in GraphPad Prism (v7) using 1-way or 2-way ANOVA with correction for multiple comparisons with Tukey's post-hoc test. For B-F, unpaired two-tailed t-test with Welch's correction. A p value < 0.05 (\*) was considered significant. p < 0.01 (\*\*), p < 0.001 (\*\*\*), and p < 0.0001 (\*\*\*\*). **H.** Western blots analysis of DRG and sciatic nerve (SN) lysates prepared from sham operated mice and at different post-SNC time points (d1-d21), probed with anti-CD11b and anti-ERK1/2 as loading control. **I.** Quantification of CD11b signal in DRGs and SNs. Unpaired two-tailed Student's t-test compared to sham operated. \*p<0.05, biological replicates n= 4 (with 4 mice for each time point).

### Figure 3

#### Sciatic nerve injury triggers massive accumulation of hematogenous leukocytes in the injured nerve but not axotomized DRGs.

**A.** Parabiosis complex of a wildtype (WT) and a tdTomato (tdTom) mouse. Mice were surgically paired at postnatal day 56. The timeline of the experiment is shown. **B.** Flow cytometric analysis of sciatic nerve trunks collected from non-parabiotic (single) tdTom mice, WT parabionts, and tdTom parabionts. Dotplot of live (CD11b<sup>+</sup>, tdTom<sup>+</sup>) cells in the d3 post-SNC nerve. **C.** Quantification of tdTom<sup>+</sup> myeloid cells in the 3d injured nerve of WT single mice (WT-S), WT parabiont (WT-para), tdTom parabiont (tdTom-para), and tdTom single (tdTom-S) mice. The fraction of tdTom<sup>+</sup> myeloid cells (CD45<sup>+</sup>, CD11b<sup>+</sup>), MoDC (CD45<sup>+</sup>, CD11b<sup>+</sup>, CD11c<sup>+</sup>, Ly6G<sup>-</sup>), and Mo/Mac (CD45<sup>+</sup>, CD11b<sup>+</sup>, CD11c<sup>-</sup>,

Ly6G<sup>+</sup>) is shown. For quantification of tdTom<sup>+</sup> immune cells, nerves from the WT parabiont and the tdTom parabiont were harvested separately (3 mice per data point) with n= 2-3 biological replicates. Flow data are represented as fraction of tdTom<sup>+</sup> cells ± SEM. Flow data are represented as mean ± SEM. Statistical analysis was performed in GraphPad Prism (v8) using 1-way ANOVA with correction for multiple comparisons with Tukey's post-hoc test. p value of < 0.001 (\*\*\*) and p < 0.0001 (\*\*\*\*). **D.** Longitudinal sciatic nerves sections of the WT parabiont at d7 post-SNC. The nerve crush site is marked with a white dotted line, proximal is to the left, distal to the right. Anti-F4/80 (green) and tdTom<sup>+</sup> cells (red) staining is shown. Scale bar, 500 μm, for insets, 20 μm. **E.** Lumbar DRG cross sections of WT parabionts harvested from sham operated mice, at d3, and d7 post-SNC. Sections were stained with anti-F4/80 (green) and anti-NF200 (white). Hematogenous (tdTom<sup>+</sup>) leukocytes are marked with white arrows. Scale bar, 50 μm. **F.** Quantification of tdTom<sup>+</sup> cells per field of view (FOV = 4000 μm<sup>2</sup>) in DRG sections of the WT parabiont. Data are shown as number of tdTom<sup>+</sup> cells ± SEM, n= 3-5 mice per time point. Student's t test with p < 0.5 (\*) considered statistically significant, p < 0.01 (\*\*). **G.** Whole mount anti-Iba1 immunofluorescence staining of L4 DRGs from intact, d3, and d7 post-SNC time points. Scale bar, 200 μm. **H.** Morphological reconstruction of Iba1<sup>+</sup> cells in DRGs with Imaris. Analysis of DRG resident macrophages revealed amoeboid (cyan) and elongated (orange) morphologies if the nerve was not injured. At d3 and d7 post-SNC, a subpopulation of Iba1<sup>+</sup> cells with stellate (yellow) morphology was observed in DRGs. Scale bar, 50 μm. **I.** Quantification of total volume of Iba1<sup>+</sup> structures in DRGs, rendered by Imaris. The total volume of Iba1<sup>+</sup> structures per DRG was quantified on the intact side and the injured side of the same mouse at d3 post-SNC (n= 3 mice). Paired Student's t test, p value < 0.05 (\*), was considered significant. **J.** Quantification of Iba1<sup>+</sup> cells with amoeboid, elongated, and stellate morphologies. **K.** Quantification of cell volume of individual Iba1<sup>+</sup> cells with amoeboid, elongated, and stellate morphologies. At d3 post-SNC, a total of 416 cells were reconstructed on the intact side and a total of 234 cells on the injured side. At d7 post-SNC, a total of 136 cells were reconstructed on the intact side and a total of 93 cells on the injured side. The distribution of morphological categories ± SEM (J) and cell volumes ± SEM (K) are shown. Paired, two-tailed Student's t test, a p value < 0.05 (\*) was considered significant. p < 0.01 (\*\*).

#### Figure 4

##### Stable up-regulation of immune function associated gene co-expression networks in axotomized DRGs.

Analysis of bulk RNAseq data from naïve and axotomized DRGs. DRGs were harvested from sham operated mice, d1, d3, and d7 post-SNC. **A.** Network analysis of whole transcriptomes from naïve and axotomized DRGs. Gene dendrogram identifies several co-expression modules. **B.** Gene ontology (GO) analysis revealed significant and stable upregulation of the pink and turquoise modules. **C.** Gene set enrichment analysis. Shown is the enrichment plot for GO terms of the turquoise module with overrepresentation of immune system processes. **D-F.** Quantification of SNC-induced upregulation of commonly used macrophage markers *Itgam* (CD11b), *Adgre1* (F4/80), and *Aif1* (Iba1) in axotomized DRGs. **G-I.** Quantification of SNC induced upregulation of the RAGs *Atf3*, *Jun*, and *Stat3* in DRGs. **J-L.** Quantification of SNC induced upregulation of the chemokine receptor *Ccr2*, and the GM-CSF receptor subunits *Csf2ra* and *Csf2rb* in DRGs. Gene expression levels are shown as Fpkms (fragments per kilobase of transcript per million mapped reads).

#### Figure 5

##### The cellular landscape of injured peripheral nerve.

**A.** Single-cell transcriptome of injured mouse sciatic nerve at d3 post-SNC, n= 3 biological replicates. Unsupervised Seurat-based clustering identifies 24 cell clusters. Cell type identity for each cluster was determined by expression analysis of established markers. **B.** List of all cell types identified by scRNA-sequencing. The size (percentile) of cell clusters and lineage relationships are shown. Abbreviations for cell cluster identities are indicated and used throughout the manuscript. **C-J.**



52 Feature plots of established cell markers used for identification of major cell types in the injured  
53 nerve. Shown are UMAP plots with markers for myeloid cells (*Itgam/CD11b*), fibroblast-  
54 like/mesenchymal cells (*Pdgfra*, *Sox9*), repair Schwann cells (*Ncam1*, *Ngfr/p75*), endothelial cells  
55 (*Pecam/CD31*), pericytes /smooth muscle vascular cells (*Pdgfrb*), and mitotically active cells  
56 (*Mki67/Ki67*). Expression levels are color coded and calibrated to average gene expression. **K.**  
57 Dotplot shows cell type-specific expression of the most abundant transcription factors (TFs) in Fb,  
58 dMES, eMES, pMES, CL, SC1-3, EC1-3, PC1 and PC2 clusters identified by scRNA-seq of 3d  
59 injured sciatic nerve. Dotplot analysis shows the average gene expression (color coded) and percent  
60 of cells (dot size) that express the listed TFs in each cluster.

61  
62 **Figure 6**  
63 **Macrophage subpopulation in the injured nerve are functionally distinct and localize to**  
64 **specific sites.**

65 **A–E.** Feature plots of *Adgre1* (F4/80), *Aif1* (Iba1), *Cd68* (scavenger receptor class D), *Cx3cr1*  
66 (fractalkine receptor), and *CD209a* (DC-SIGN) expression in the d3 post-SNC nerve. **F.** scRNAseq  
67 dot plot analysis of transcription factors (TFs) enriched in leukocytes. Average gene expression and  
68 percentage of cells expressing the TF are shown. **G.** Violin plot of *Ly6c2* (Ly6C) expression in  
69 immune cells of the d3 post-SNC nerve. **H–K.** Flow cytometric analysis of sciatic nerve Mo/Mac  
70 ( $CD45^+$ ,  $CD11b^+$ ,  $Ly6G^-$ ,  $CD11c^-$ ) in naïve mice, d1, d3, and d7 post-SNC mice. Mo/Mac maturation  
71 was assessed by Ly6C surface staining. **L, M.** Quantification of Ly6C distribution on Mo/Mac in naïve  
72 nerves and at different post-SNC time points (n= 11 biological replicates per time point); (L) Percentile  
73 of  $Ly6C^-$ ,  $Ly6C^{int}$ , and  $Ly6C^{hi}$  Mo/Mac and (M) number of  $Ly6C^-$ ,  $Ly6C^{int}$ , and  $Ly6C^{hi}$  Mo/Mac. Flow  
74 data are represented as mean  $\pm$  SEM. Statistical analysis was performed in GraphPad Prism (v7)  
75 using 1-way or 2-way ANOVA with correction for multiple comparisons with Tukey's post-hoc test. A p  
76 value < 0.05 (\*) was considered significant. p < 0.01 (\*\*), p < 0.001 (\*\*\*), and p < 0.0001 (\*\*\*\*). **N.**  
77 Feature plot showing *Arg1* (arginase-1) expression in the 3d post-SNC nerve. **O–Q.** Longitudinal  
78 sciatic nerve sections of *Arg1-YFP* reporter mice, from naïve mice (O), d3 (P) and d7 (Q) post-SNC  
79 mice.  $YFP^+$  cells (green) are localized to the injury site (underlined with a dashed line), proximal is to  
80 the left. Representative example of n= 4 biological replicates, scale bar = 200  $\mu$ m.

81  
82  
83 **Figure 7**  
84 **Macrophages “eat” dying leukocytes in the injured nerve.**

85 **A.** Cartoon of phagocyte with actin rich phagocytic cup eating a  $tdTom^+$  apoptotic cell (AC). “Eat me”  
86 signals displayed on the surface of AC allow direct or indirect recognition via engulfment receptors.  
87 Following engulfment by phagocytes, AC are digested in the phagolysosome. Cellular cholesterol  
88 levels are controlled by upregulation of specific efflux mechanisms. **B.** scRNAseq dotplot analysis of  
89 “don’t eat me” molecules (*Cd47*, *Sirpa*) and bridging molecules prominently expressed across cell  
90 types in the d3 post-SNC nerve. Average gene expression and percentage of cells expressing the  
91 gene are shown. **C.** scRNAseq dotplot analysis of engulfment receptors in the d3 post-SNC nerve.  
92 Average gene expression and percentage of cells expressing the gene are shown. **D.** Flow cytometric  
93 analysis of dead cells accumulating in the d3 and d7 nerve (n= 3 biological replicates per time point).  
94 Data are represented as mean  $\pm$  SEM. **E.** Parabiosis complex of WT (CD45.1) mouse with a  
95 (CD45.2)  $tdTom$  reporter mouse. **F.** Flow cytometry dot plot showing  $tdTom^+$  myeloid cells ( $CD45.2^+$ ,  
96  $CD11b^+$ ) in the sciatic nerve of non-parabiotic (single)  $tdTom$  mouse. **G.** Flow cytometry dot plot  
97 showing  $tdTom^+$  myeloid cells ( $CD11b^+$ ) in the sciatic nerve of the WT CD45.1 parabiont. **H.** Flow  
98 cytometry dot plot of  $CD11b^+$ ,  $tdTom^+$  gated cells from non-parabiotic (single)  $tdTom$  mice, assessed  
99 for CD45.1 and CD45.2 surface expression. **I.** Flow cytometry dot plot of  $CD11b^+$ ,  $tdTom^+$  gated cells  
100 from the CD45.1 parabiont, assessed for CD45.1 and CD45.2 surface expression. Quadrant 3 (Q3)  
101 identifies  $CD45.1^+$ ,  $tdTom^+$ ,  $CD45.2^-$  myeloid cells, indicative of ongoing efferocytosis. **J.** Flow  
102 cytometry dot plots of Mo/Mac in the injured nerve of non-parabiotic (single)  $tdTom$  mice. Mo/Mac  
103 maturation was assessed by Ly6C surface staining. Shown are monocytes ( $Ly6C^{hi}$ ), Mo/Mac

14 (Ly6C<sup>int</sup>), and Mac (Ly6C<sup>-</sup>). **K.** Flow cytometry dot plots of Mo/Mac in the injured nerve of the CD45.1  
15 parabiont. Shown are monocytes (Ly6C<sup>hi</sup>), Mo/Mac (Ly6C<sup>int</sup>), and Mac (Ly6C<sup>-</sup>). The quadrant with  
16 CD45.1<sup>+</sup>, tdTom<sup>+</sup>, CD45.2<sup>-</sup> cells (Q3) is highlighted. Biological replicates n= 3, with 3 parabiotic pairs  
17 per replica. **L, M.** Quantification of CD45.1<sup>+</sup>, tdTom<sup>+</sup>, CD45.2<sup>-</sup> cells in quadrant Q3 and CD45.2<sup>+</sup>,  
18 tdTom<sup>+</sup>, CD45.1<sup>-</sup> cells in Q1. (L) In the injured nerve of tdTom (single) mice, no CD45.1<sup>+</sup> cells are  
19 detected. (M) In the injured nerve of the WT CD45.1 parabiont, CD45.1<sup>+</sup>, tdTom<sup>+</sup>, CD45.2<sup>-</sup> Mo  
20 (Ly6C<sup>hi</sup>), Mo/Mac (Ly6C<sup>int</sup>), and Mac (Ly6C<sup>-</sup>) are found; n= 3 biological replicas, with 3 parabiosis  
21 pairs pooled per replicate.

## 22 **Figure 8**

### 23 **GM-CSF is required for conditioning lesion induced dorsal column axon regeneration.**

24 **A.** Schematic showing conditioning lesion to the sciatic nerve followed by dorsal column lesion.  
25 Experimental time line of conditioning lesion (CL), dorsal column lesion (DCL), cholera-toxin B (CTB)  
26 injection, and tissue harvest is shown. **B, C.** Violin plots of *Csf2ra* and *Csf2rb* expression in the d3  
27 post-SNC sciatic nerve, as assessed by whole nerve tissue scRNAseq analysis. **D-G.** Flow cytometry  
28 dot plots of WT and *Csf2*<sup>-/-</sup> nerves from naive mice and 3d following a conditioning lesion (CL) to the  
29 sciatic nerve. Ly6C surface staining was used to assess maturation of the Mo/Mac population. Ly6C<sup>hi</sup>  
30 (immature), Ly6C<sup>int</sup>, and Ly6C<sup>-</sup> (mature) cells are shown. **H.** Quantification of percentage of Mo/Mac  
31 (CD11b<sup>+</sup> CD11c<sup>-</sup> Ly6G<sup>-</sup>) that are Ly6C<sup>-</sup>, Ly6C<sup>int</sup> and Ly6C<sup>hi</sup> in WT and *Csf2*<sup>-/-</sup> mice without (naïve) and  
32 with CL. **I.** Quantification of surface Ly6C on MoDC (CD11b<sup>+</sup> CD11c<sup>+</sup>) in WT and *Csf2*<sup>-/-</sup> mice without  
33 (naïve) and with CL. Unpaired t-test with correction for multiple comparisons using Holm-Sidak  
34 method, \* p < 0.05; \*\*\*\* p < 0.0001. **J.** Sagittal sections through cervical spinal cords of wild-type  
35 (WT) and *Csf2*<sup>-/-</sup> mice, five weeks following bilateral DCL at cervical level 4 (C4). The spinal cord  
36 lesion site is labeled with a star (\*), rostral is to the left and caudal is to the right. To enhance dorsal  
37 column axon regeneration, a CL to the sciatic nerve was performed 7d prior to DCL (CL + DCL).  
38 Dorsal column axons were visualized by CTB injection in the sciatic nerve. The brackets indicated the  
39 distance between the lesion center and the rostral tip of CTB labeled axons. **K.** Quantification of axon  
40 regeneration. The distance between CTB labeled axon tips and the center of the spinal lesion was  
41 measured; 0 μm marks the injury site, the gap between the lesion center and traced axons (= retraction)  
is shown for WT and *Csf2*<sup>-/-</sup> without CL. For each genotype and experimental condition n ≥ 8 biological replicates. One-way ANOVA with Tukey posthoc correction. \*\* p<0.01. Scale bar, 200 μm. **L.** Representative images primary DRG neurons isolated from WT and *Csf2*<sup>-/-</sup> mice, with and without a d3 CL. Cultures were stained with of anti-neurofilament H (NF-H) **M.** Quantification of neurite length. Neuromath was used to quantify neurite length, neurites less than 30 μm in length were excluded from the analysis. n ≥ 114 neurons, n= 2 biological replicates. Two-tailed Student's t-Test with Tukey posthoc correction was used. \*p<0.05; \*\* p<0.01. Scale bar, 500 μm.

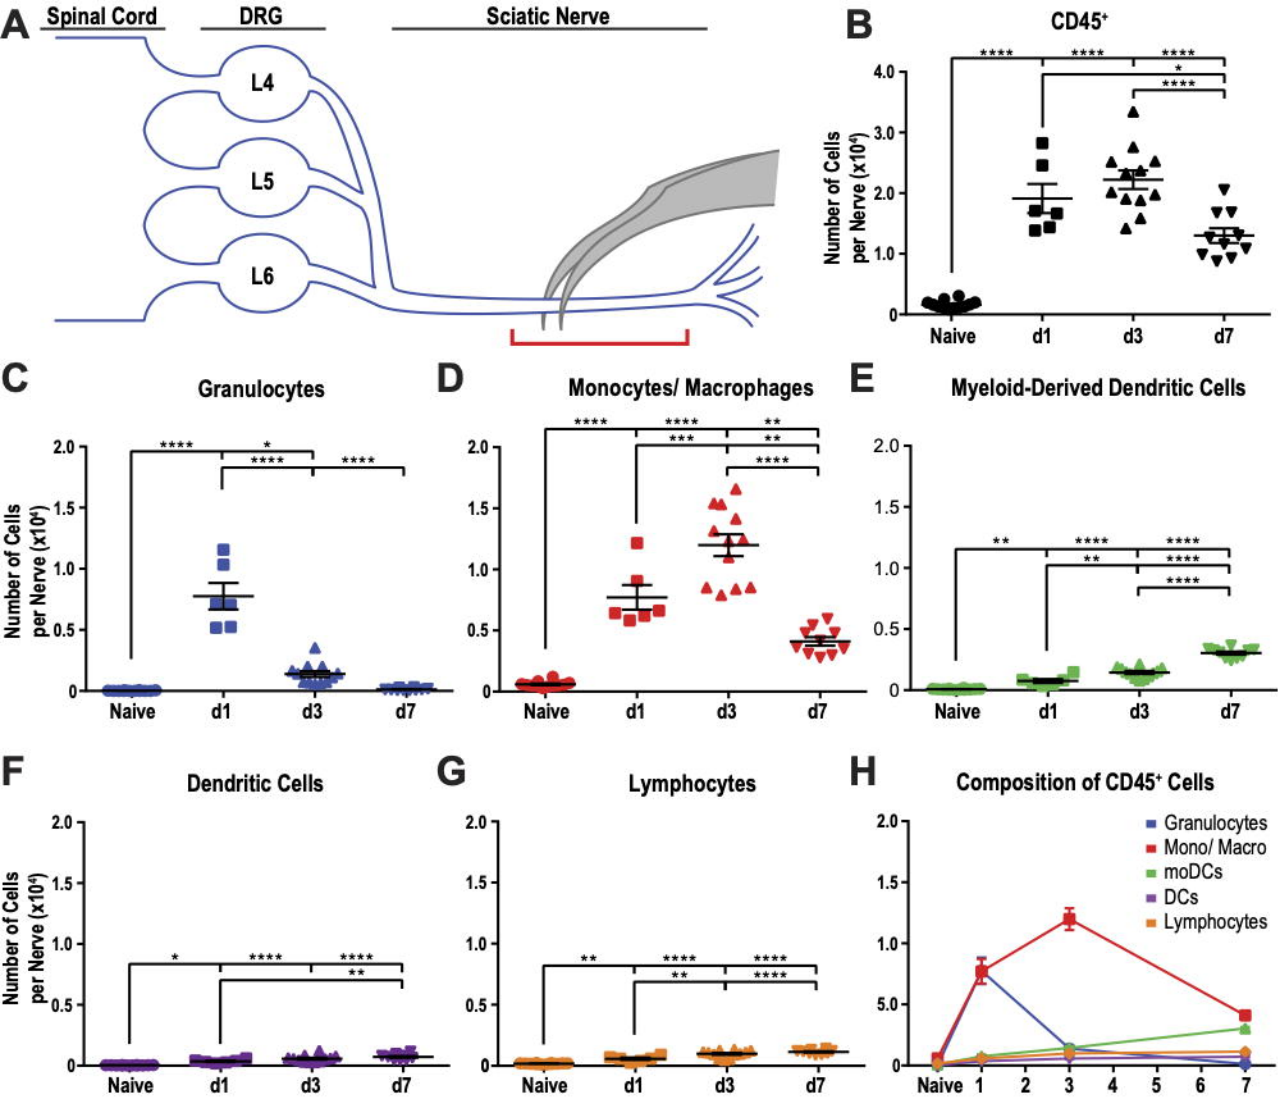

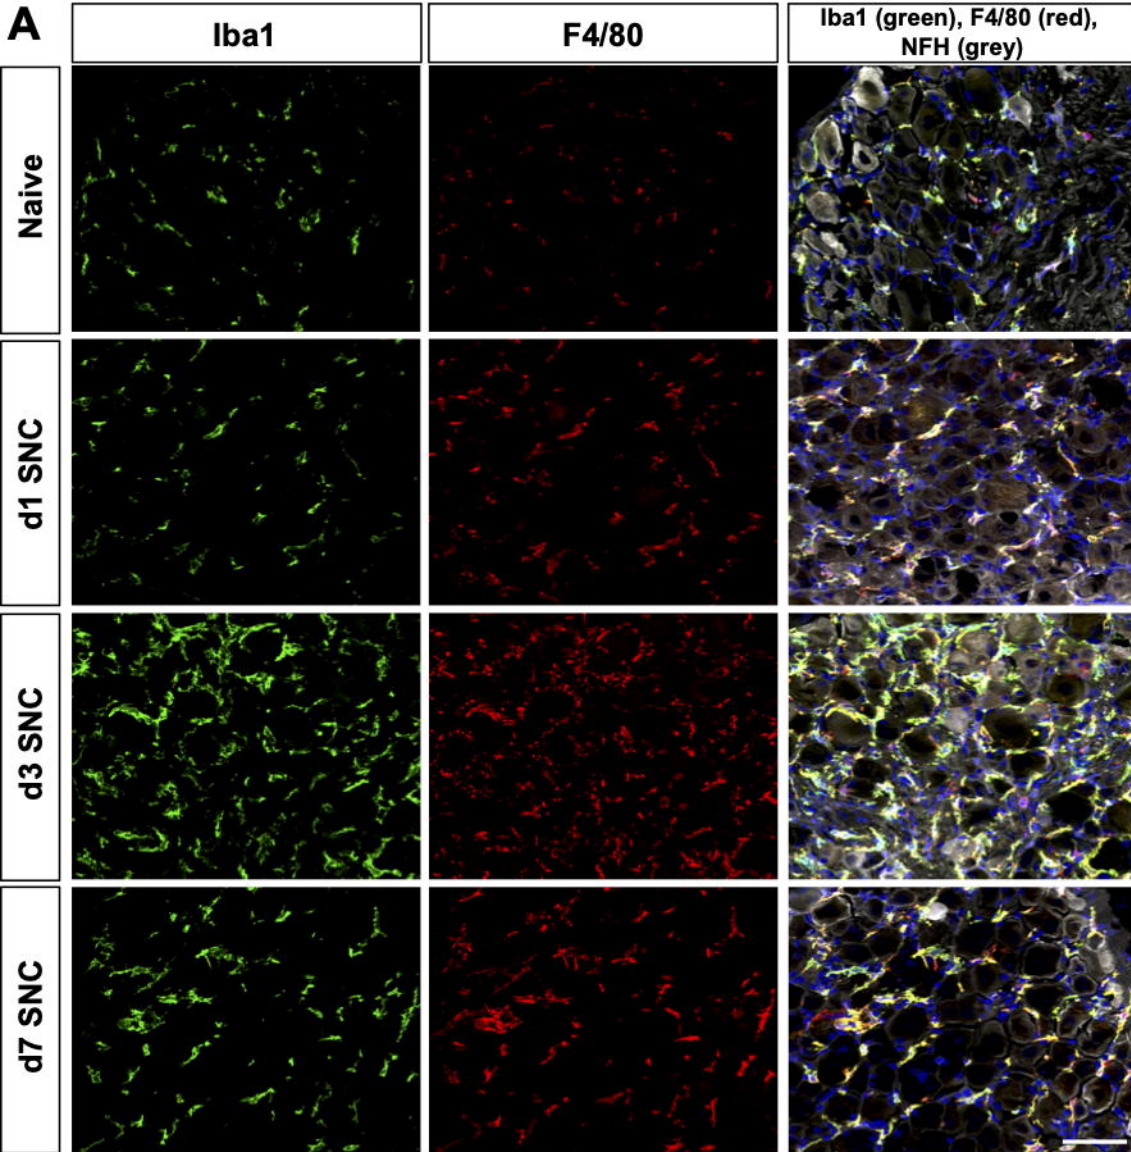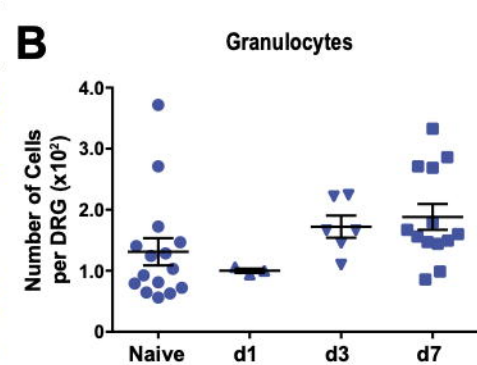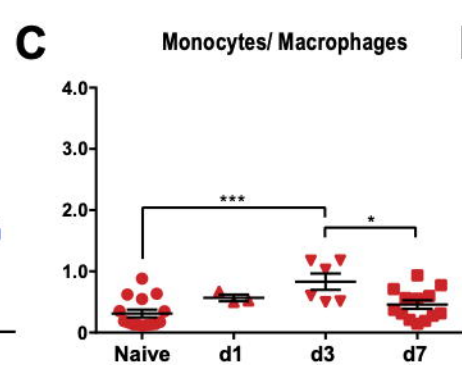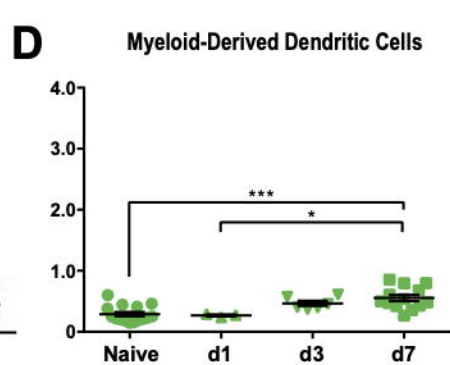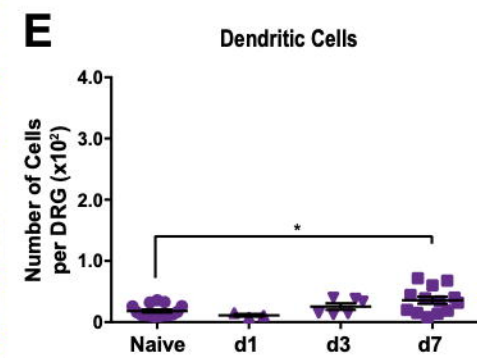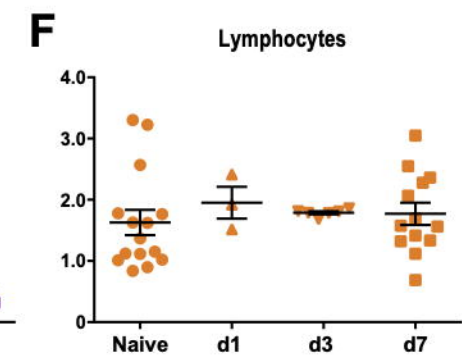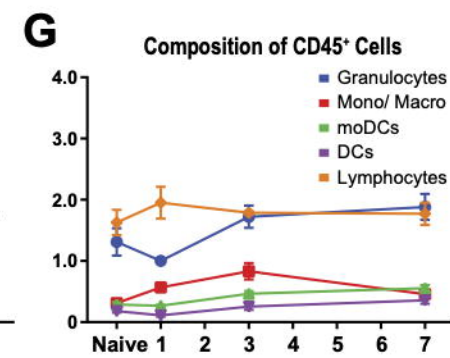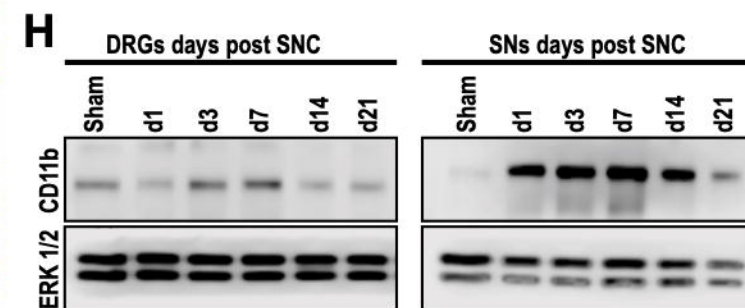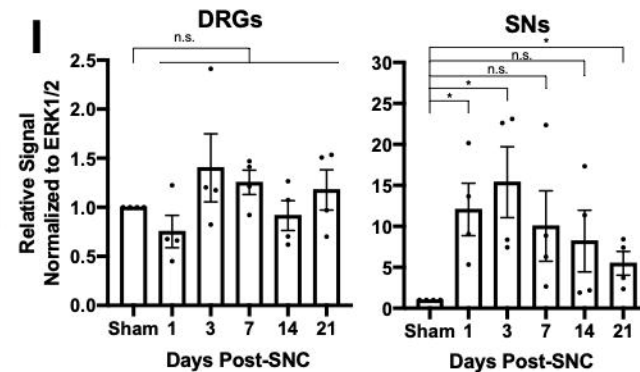

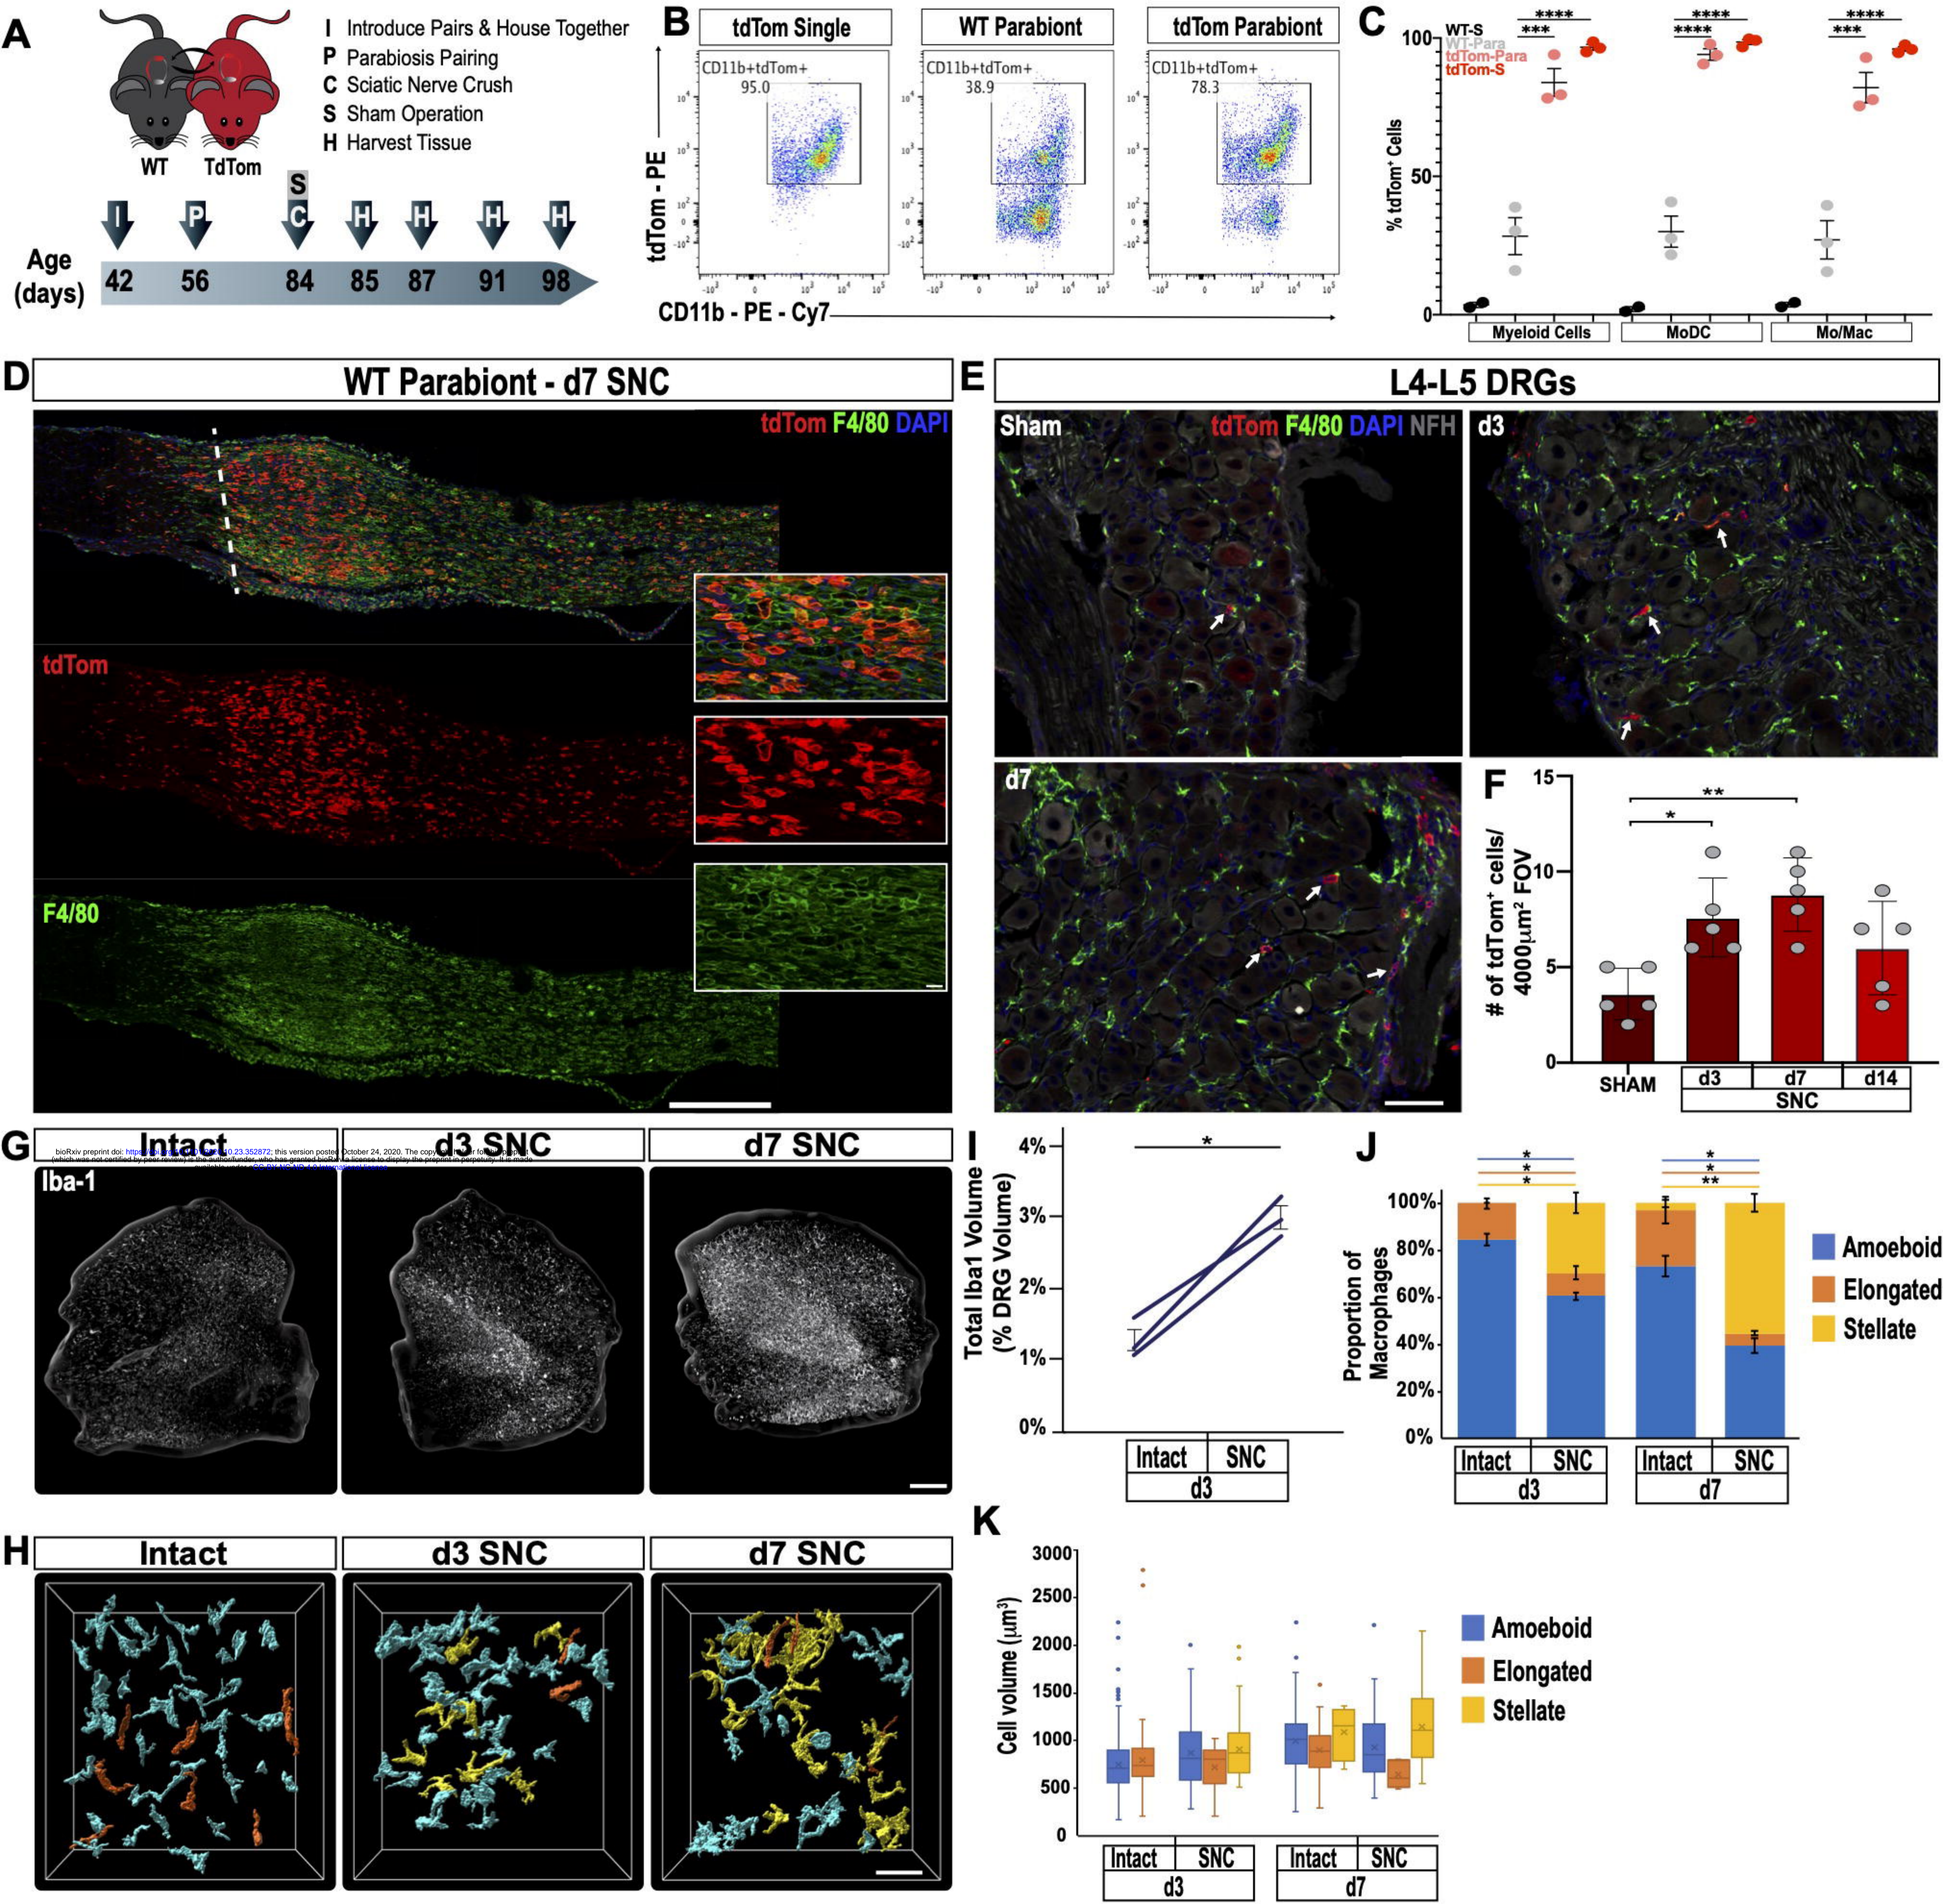

**A**

Signed bicor network with power = 14 mms = 100 ds = 4 dthresh = 0.3

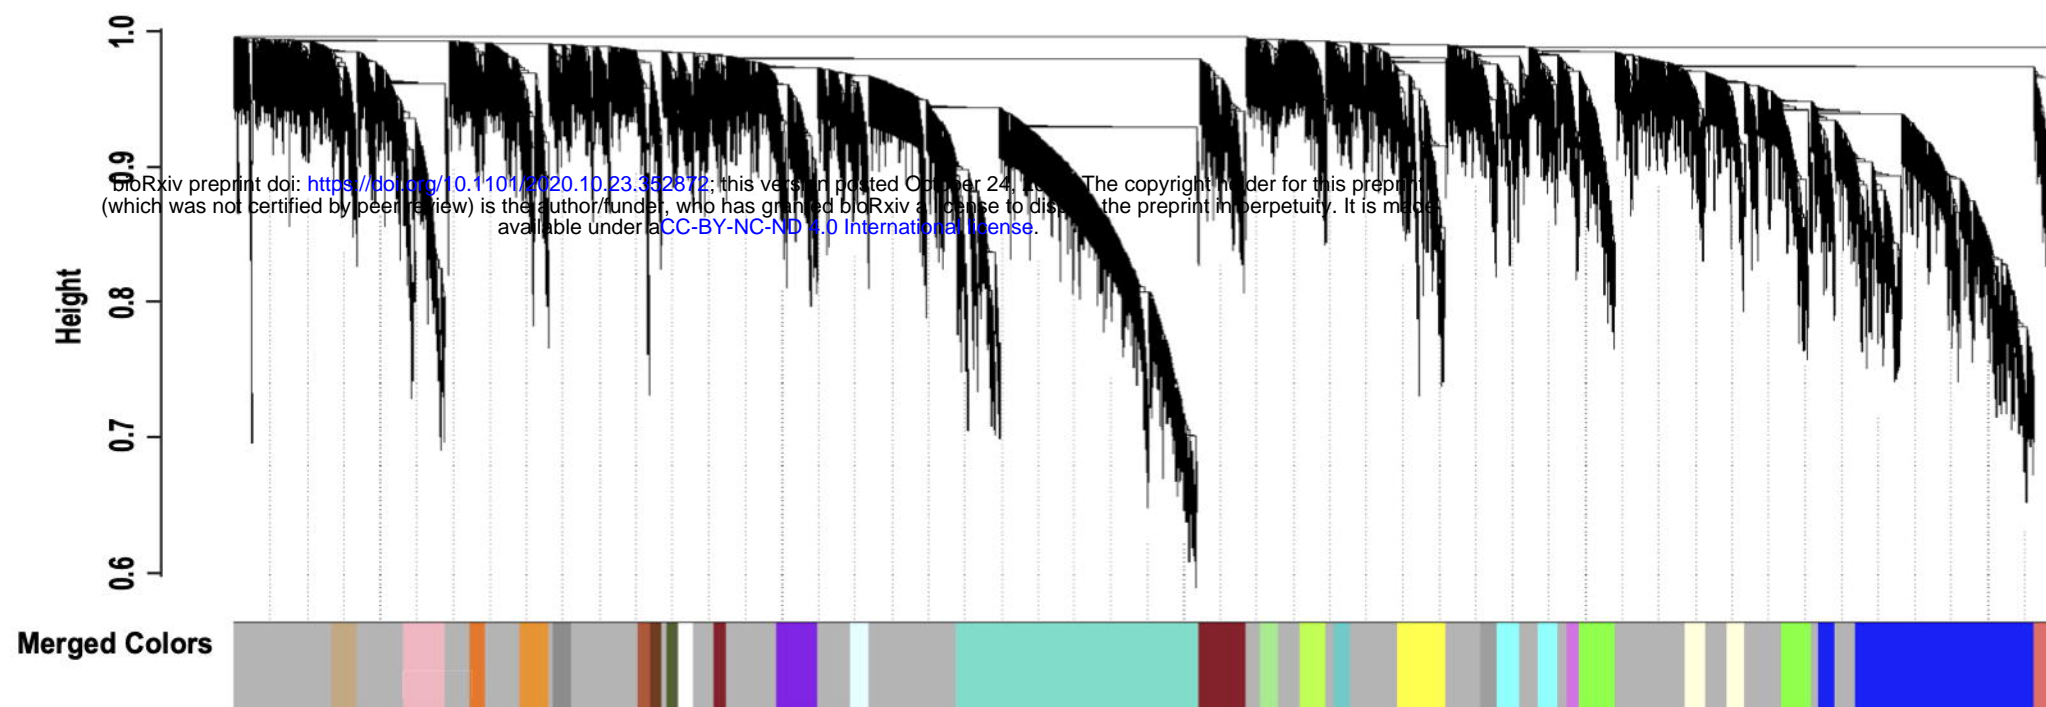**B**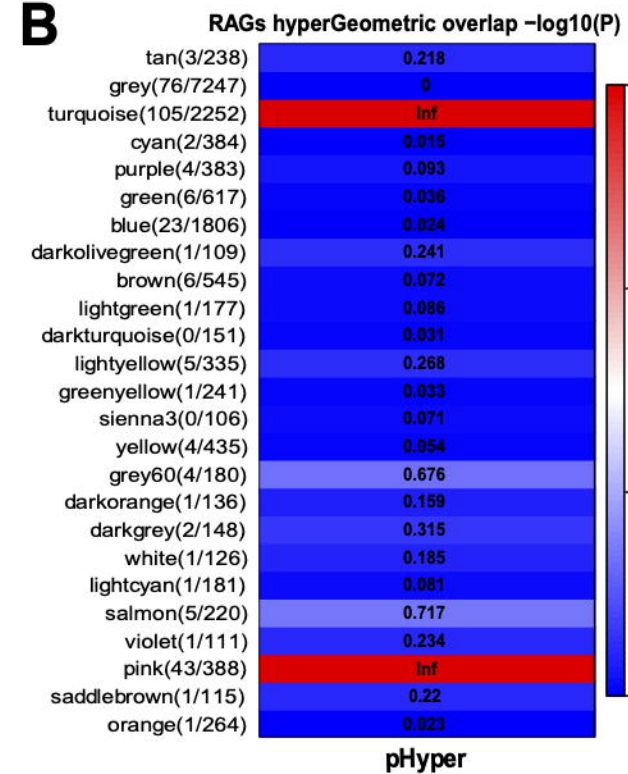**C**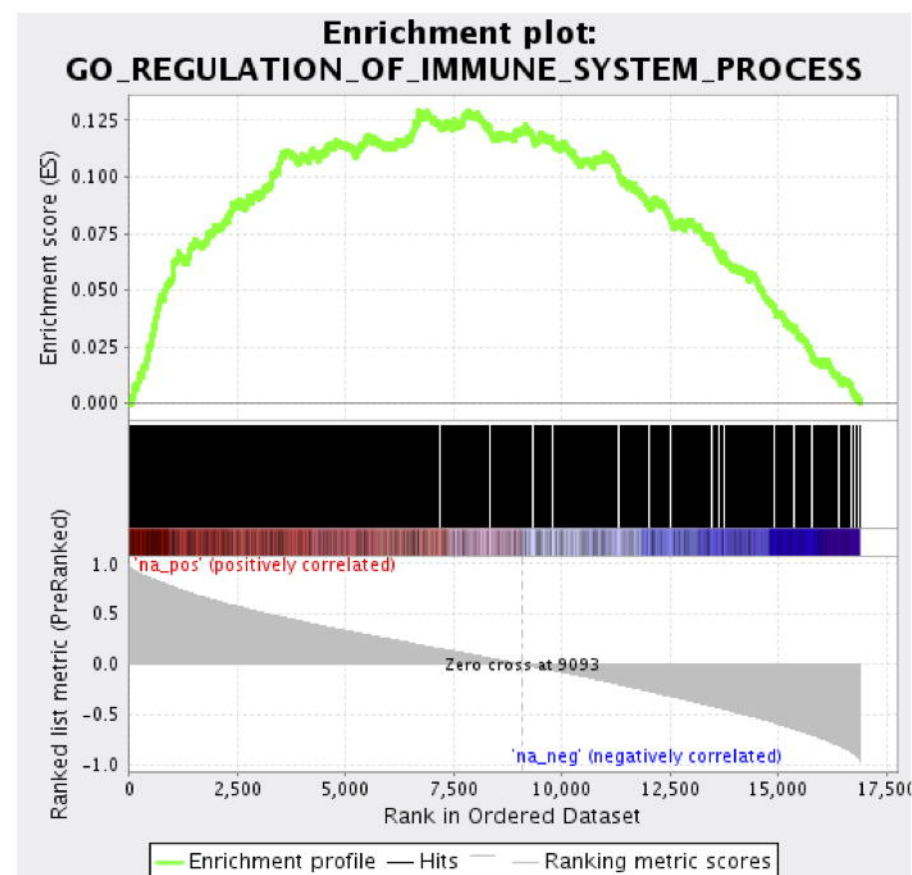**D**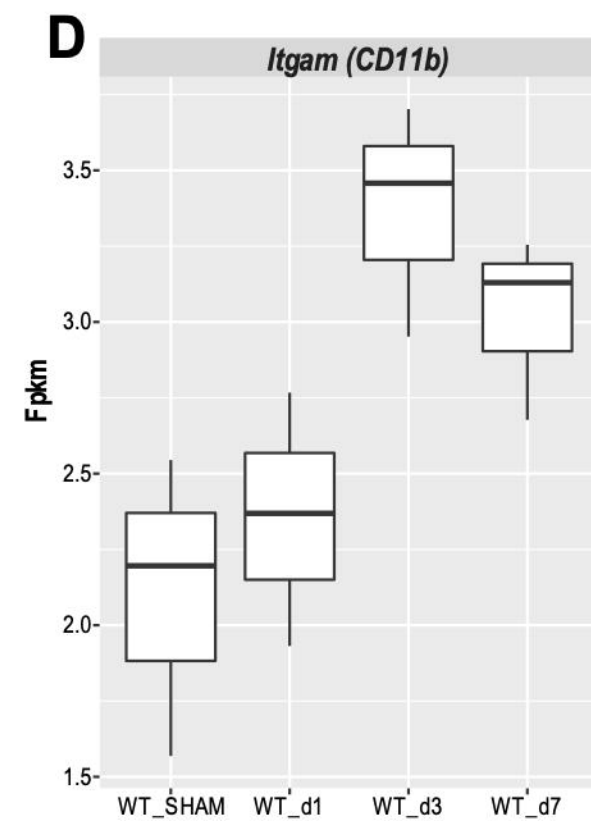**E**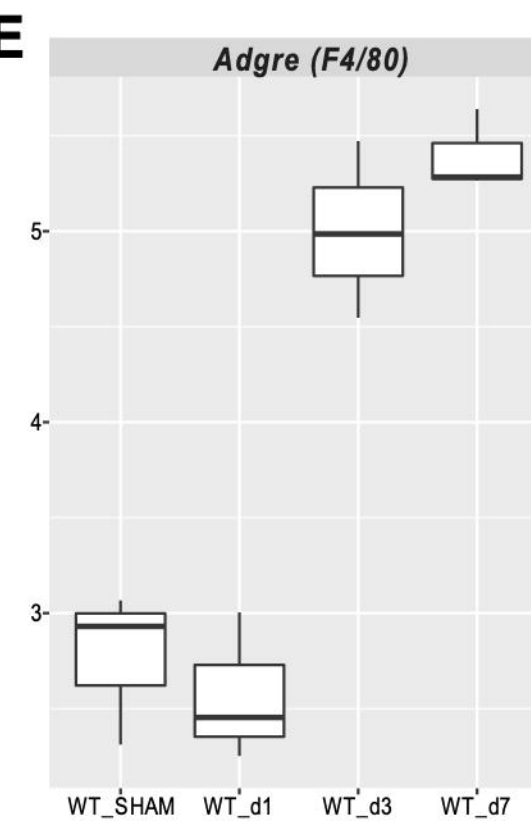**F**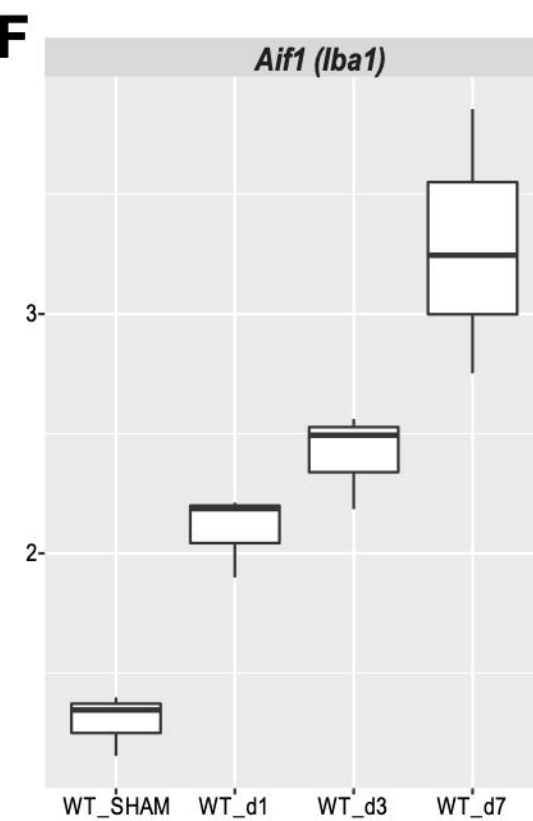**G**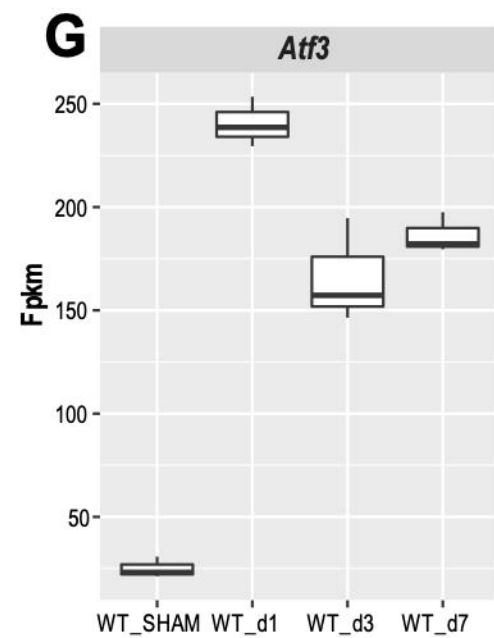**H**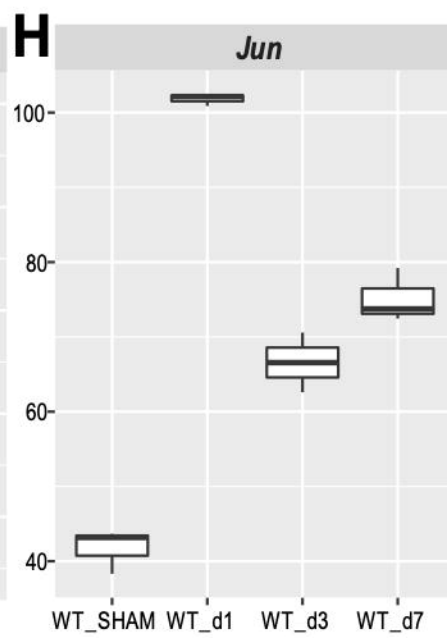**I**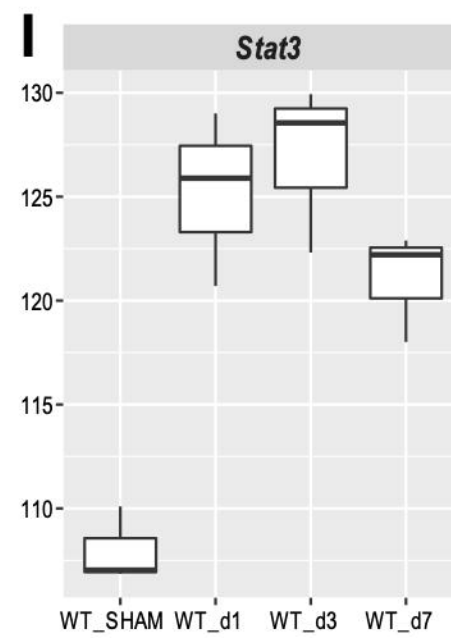**J**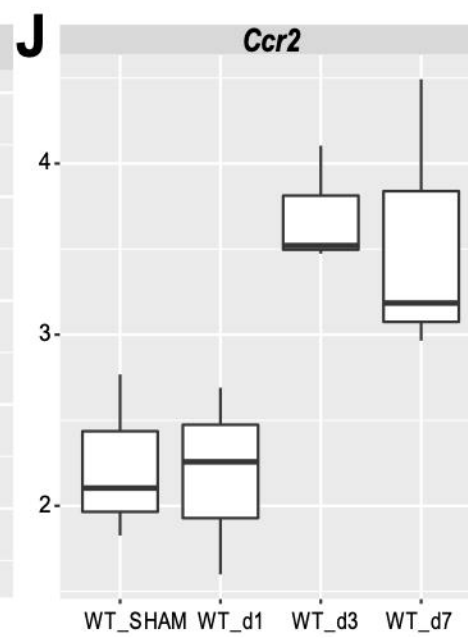**K**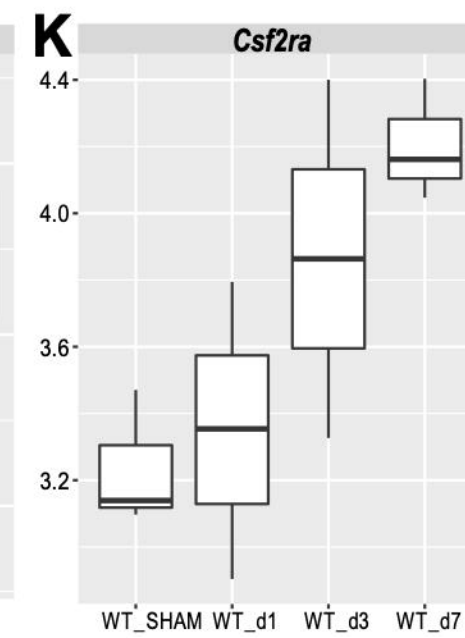**L**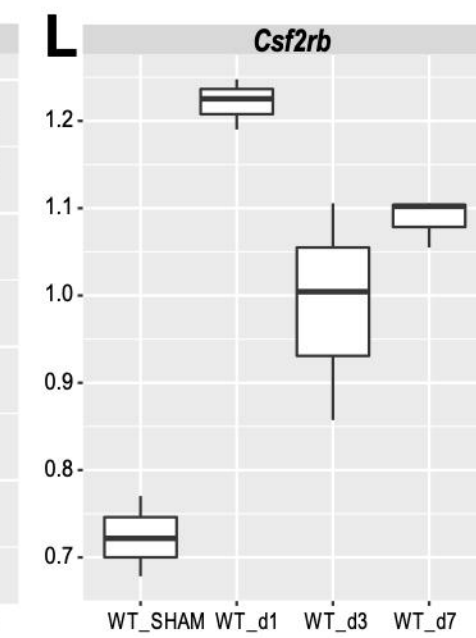

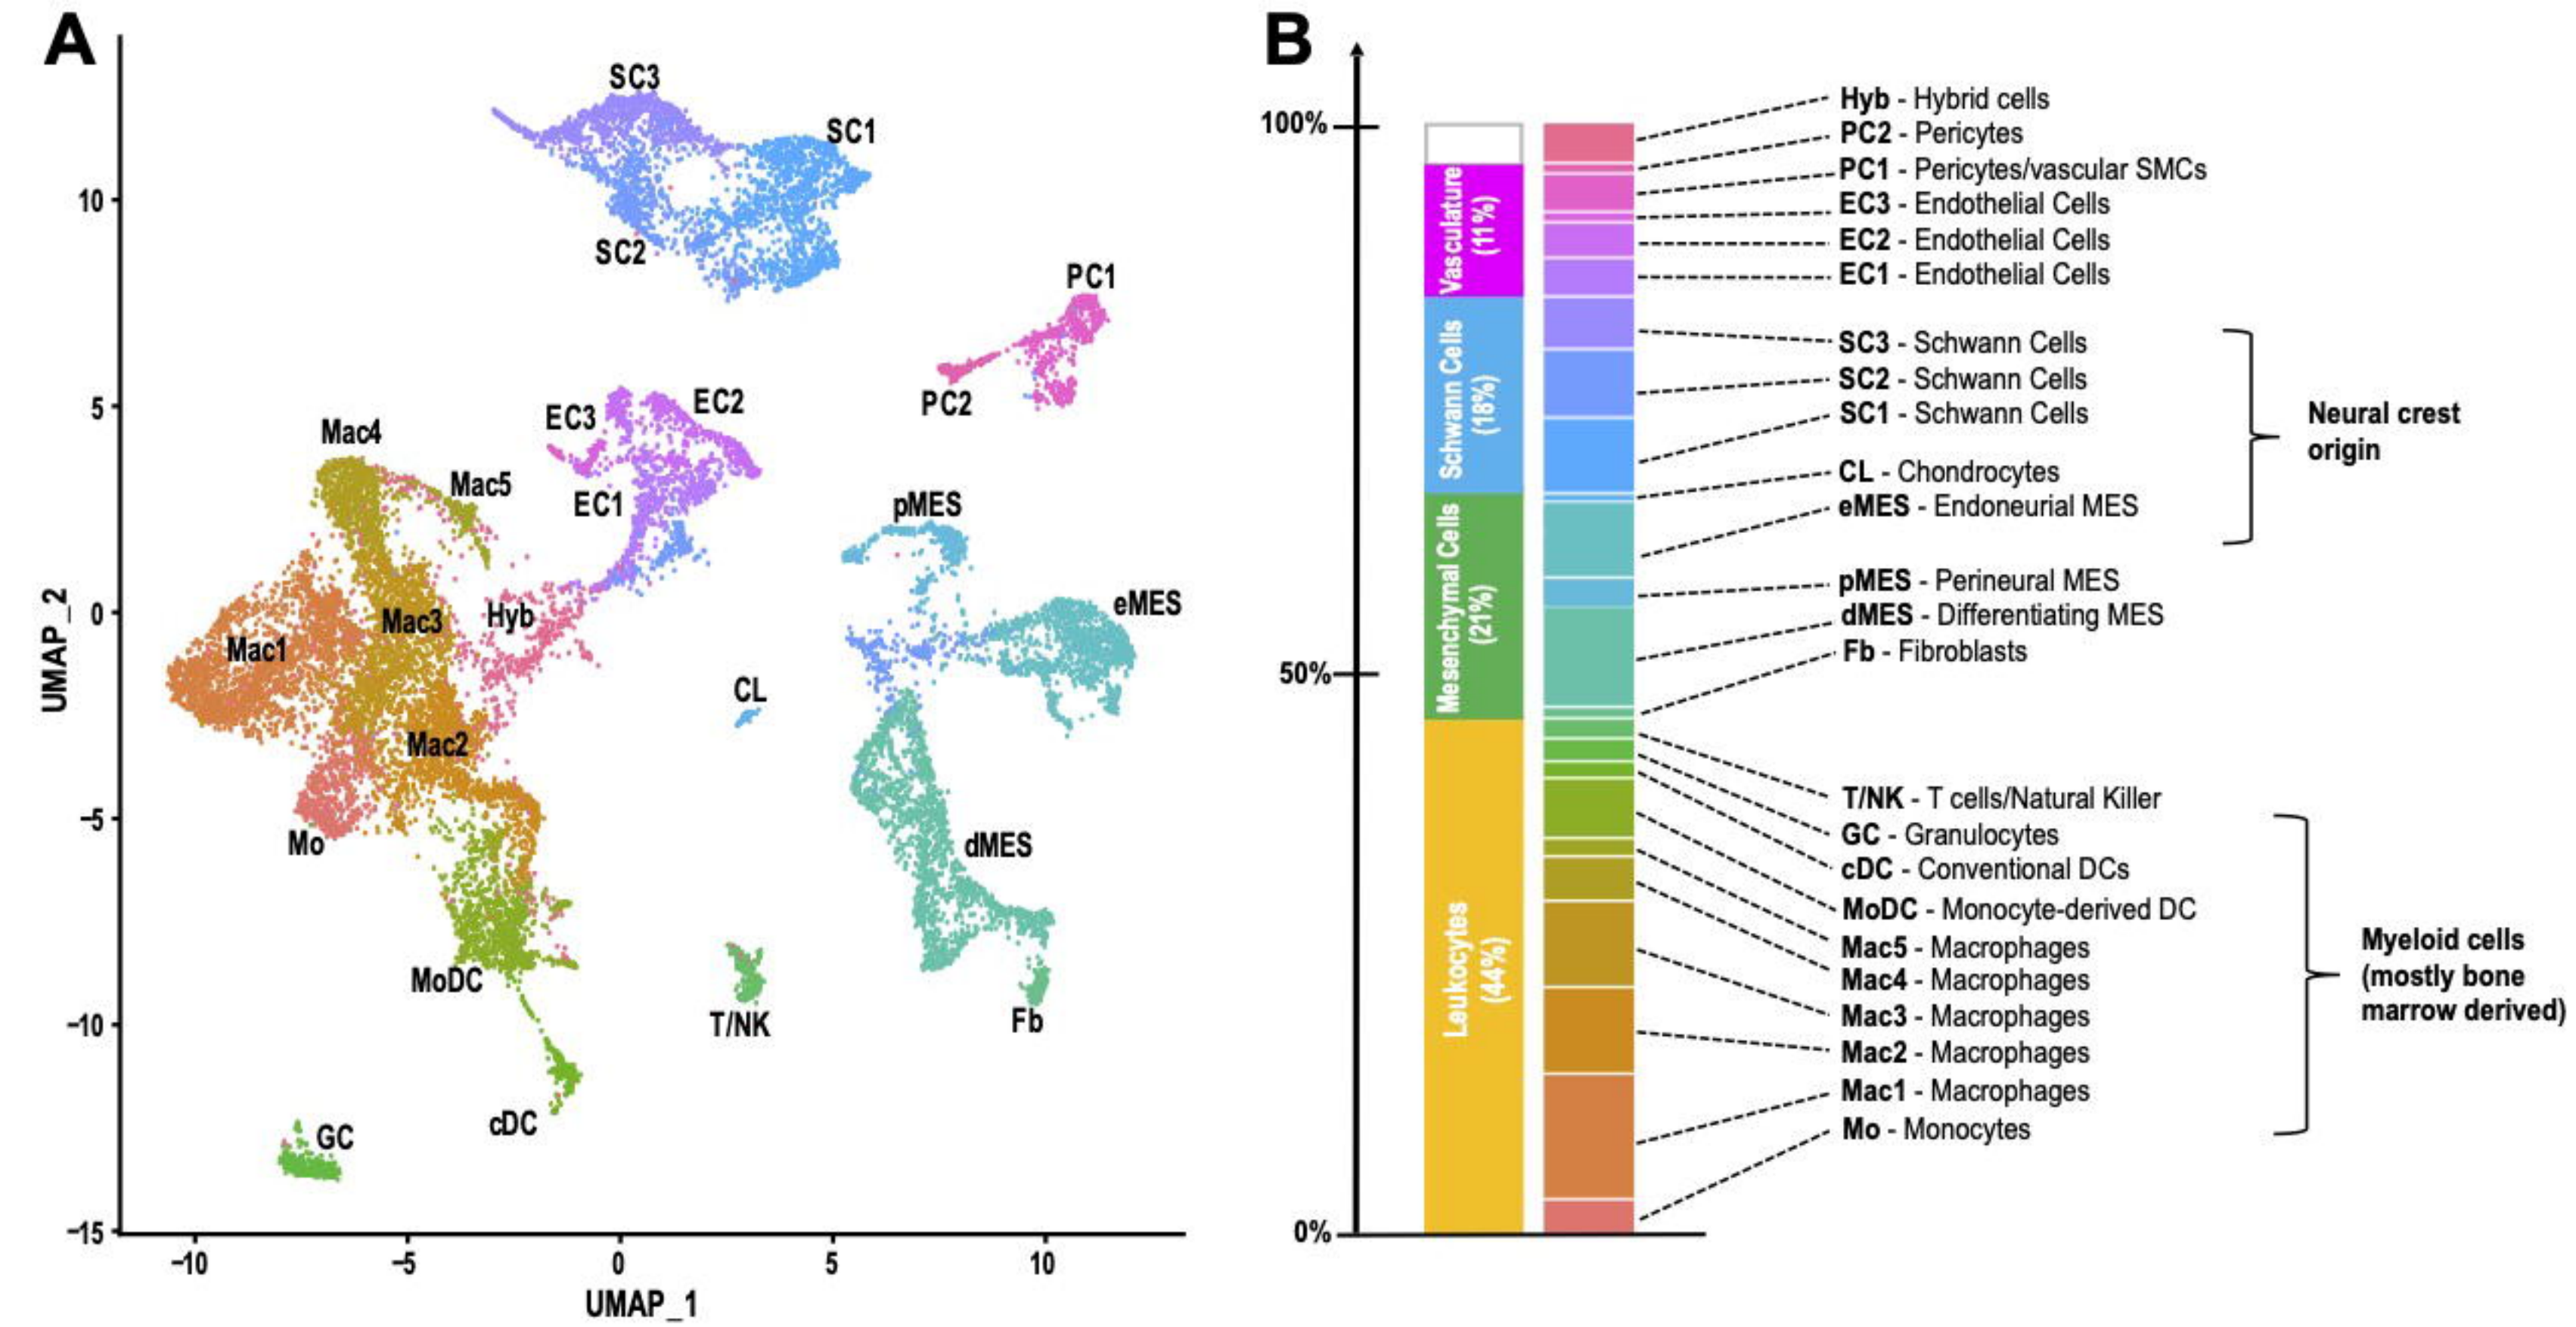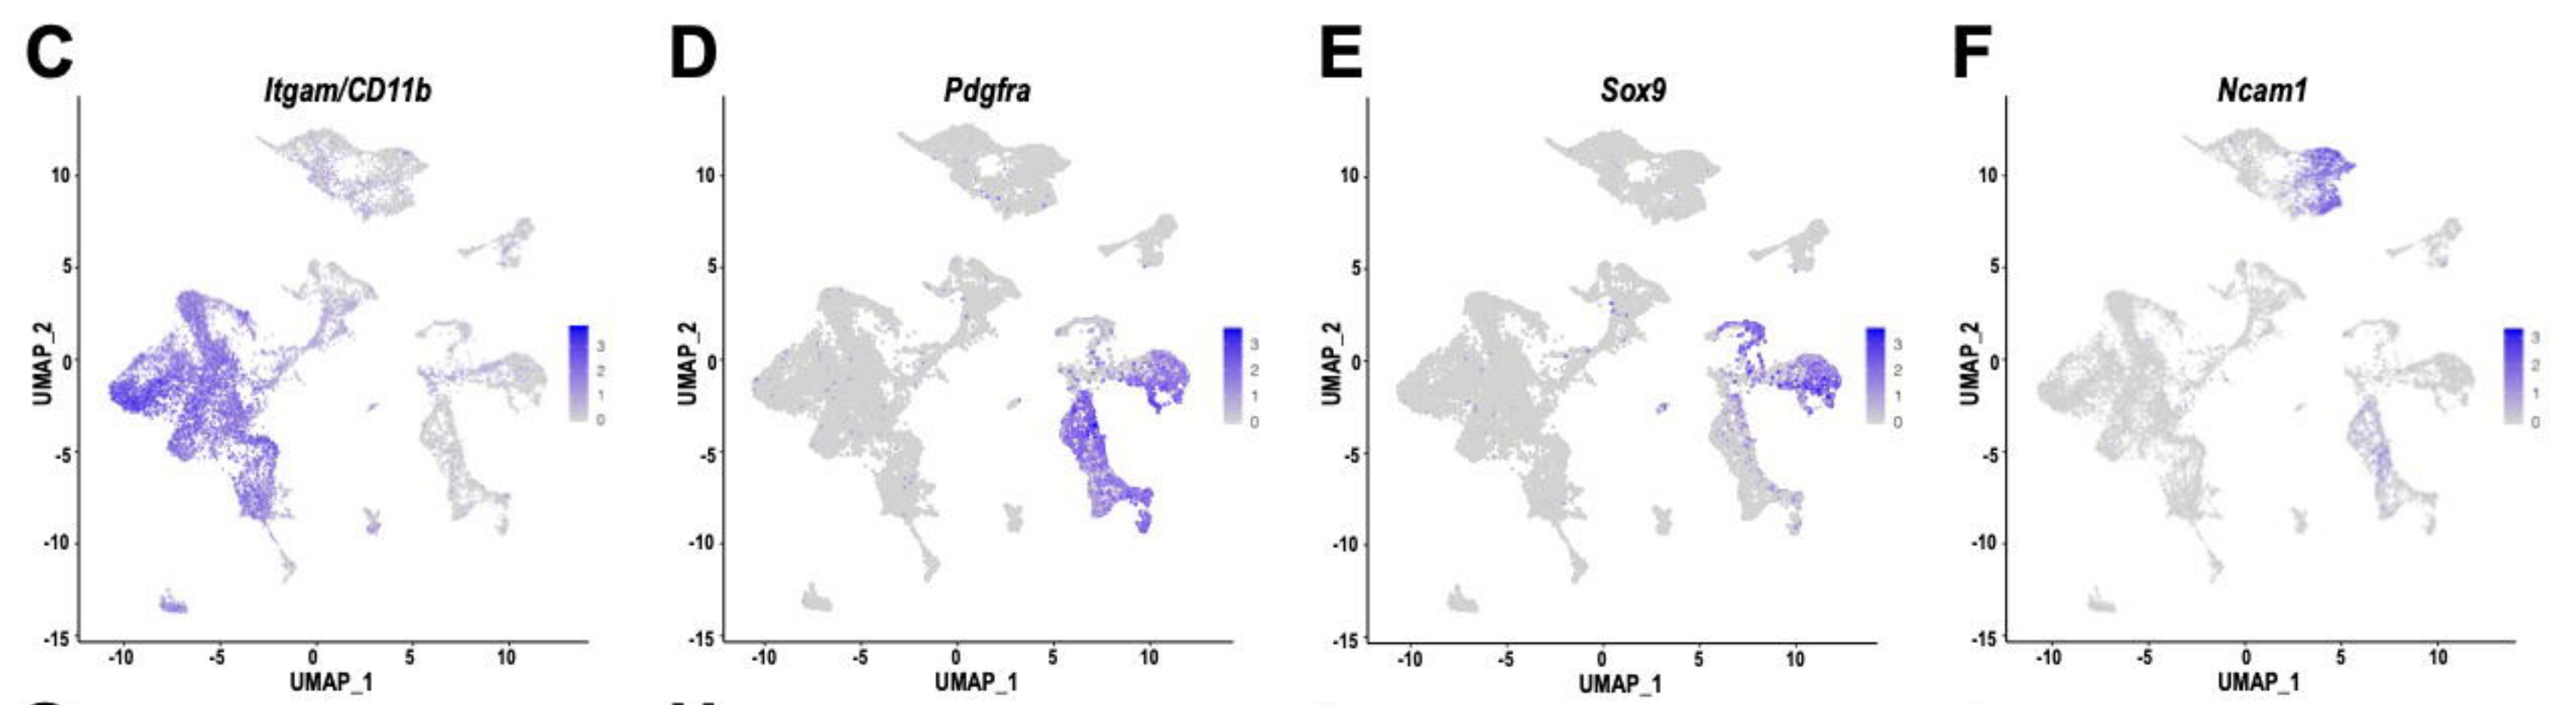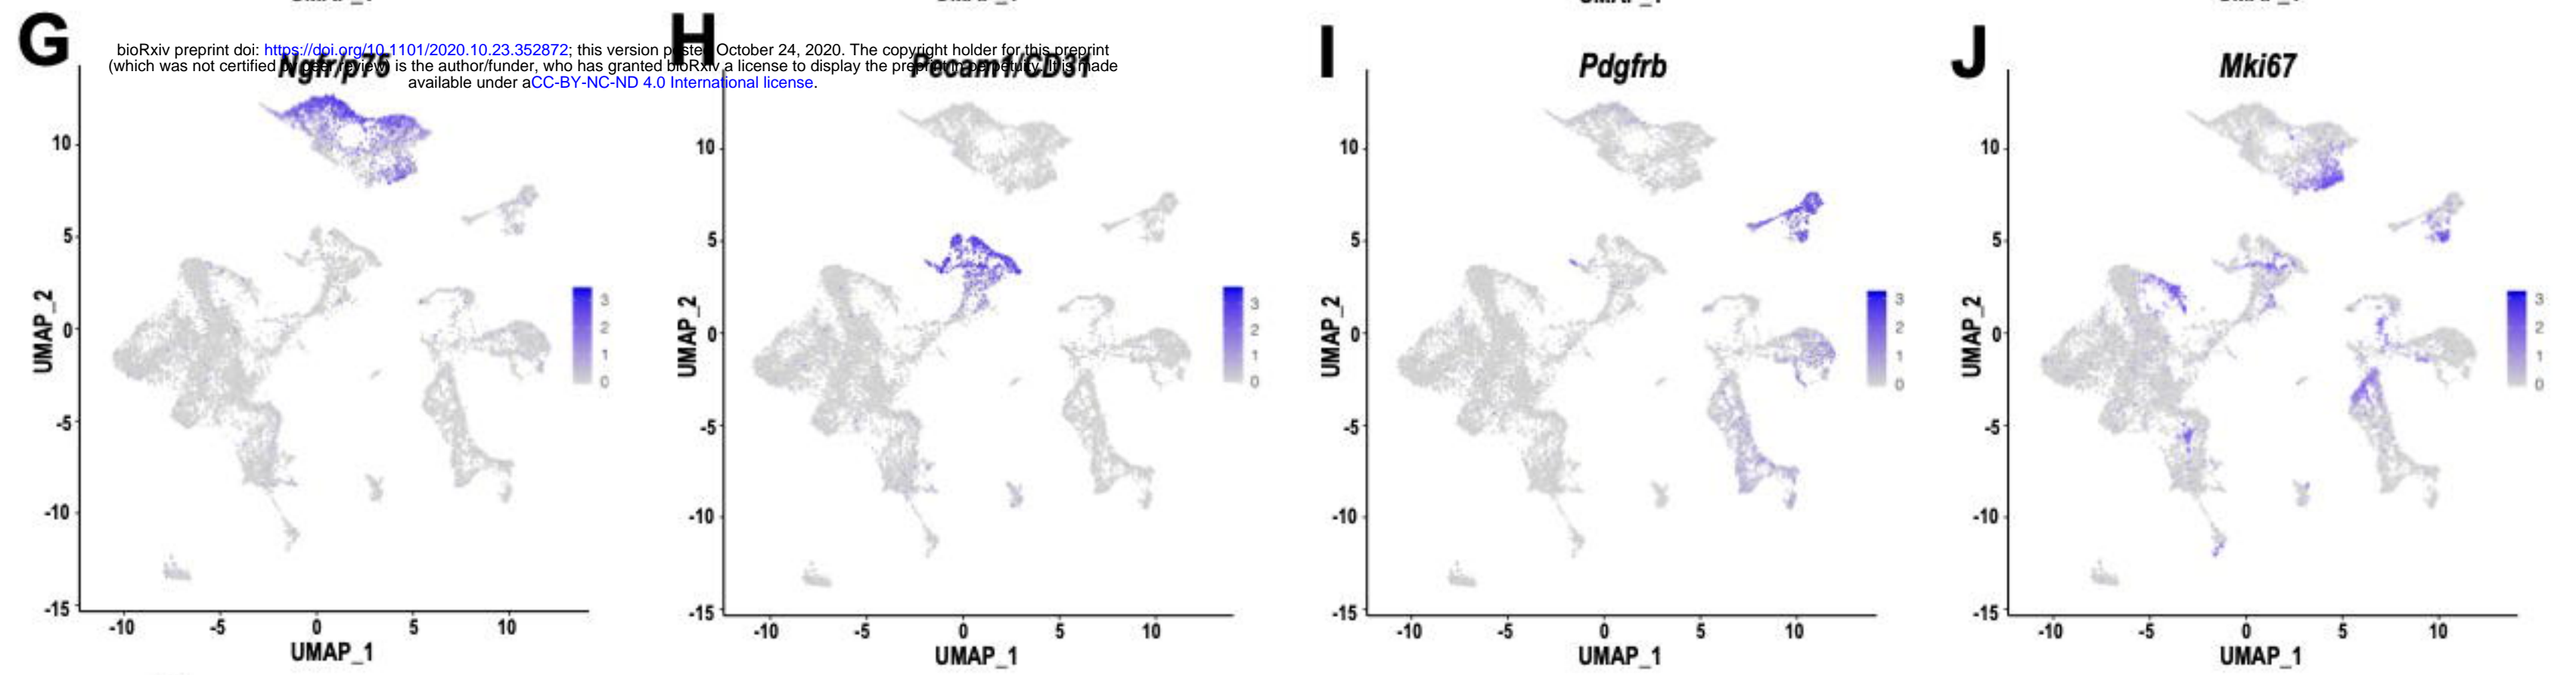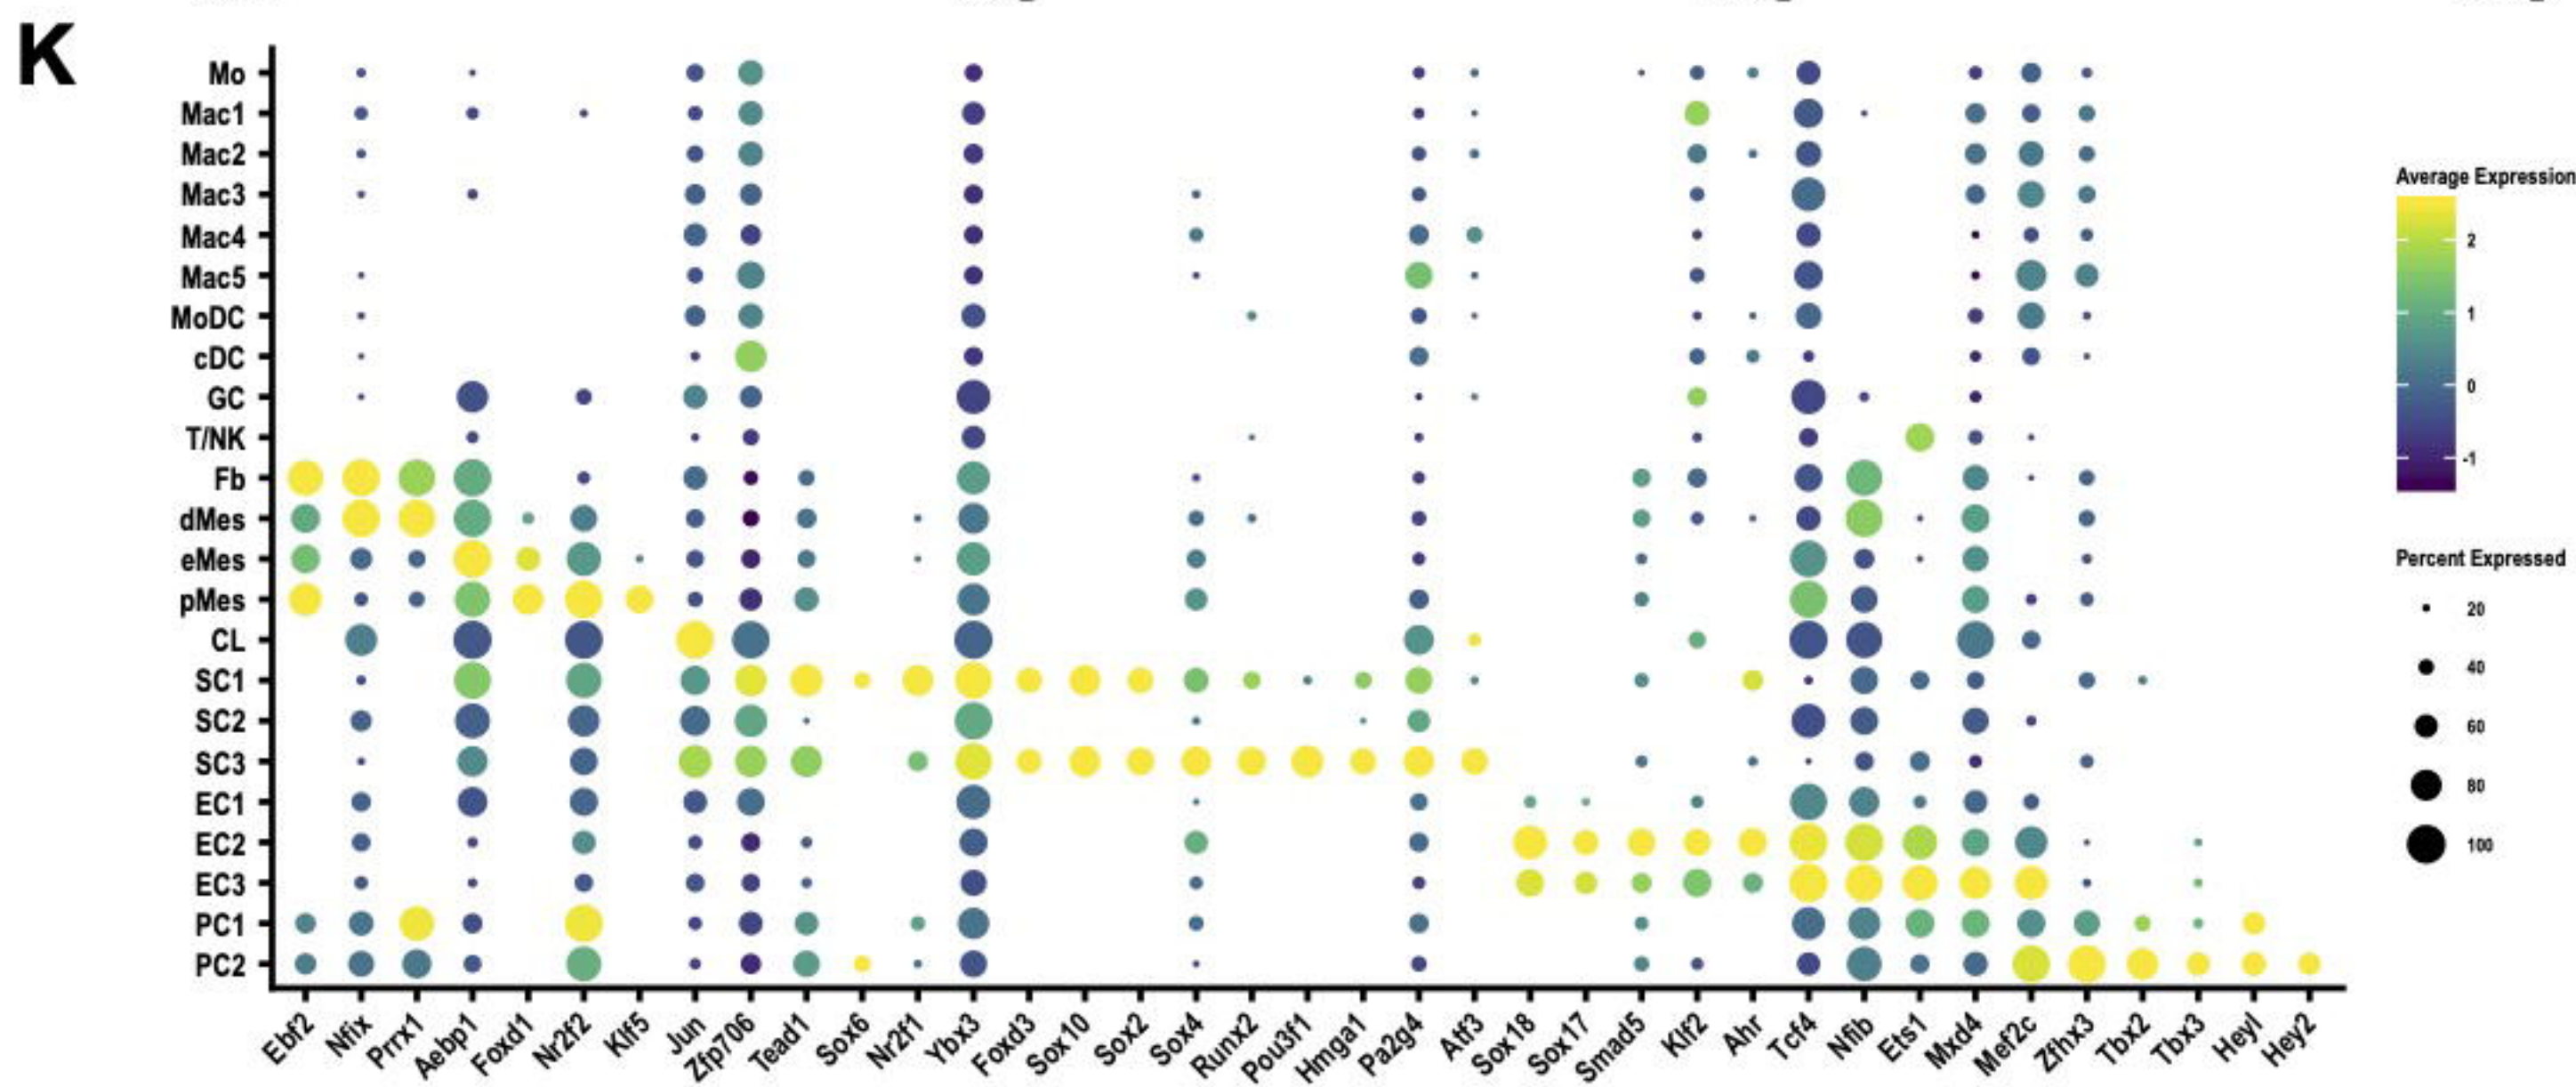

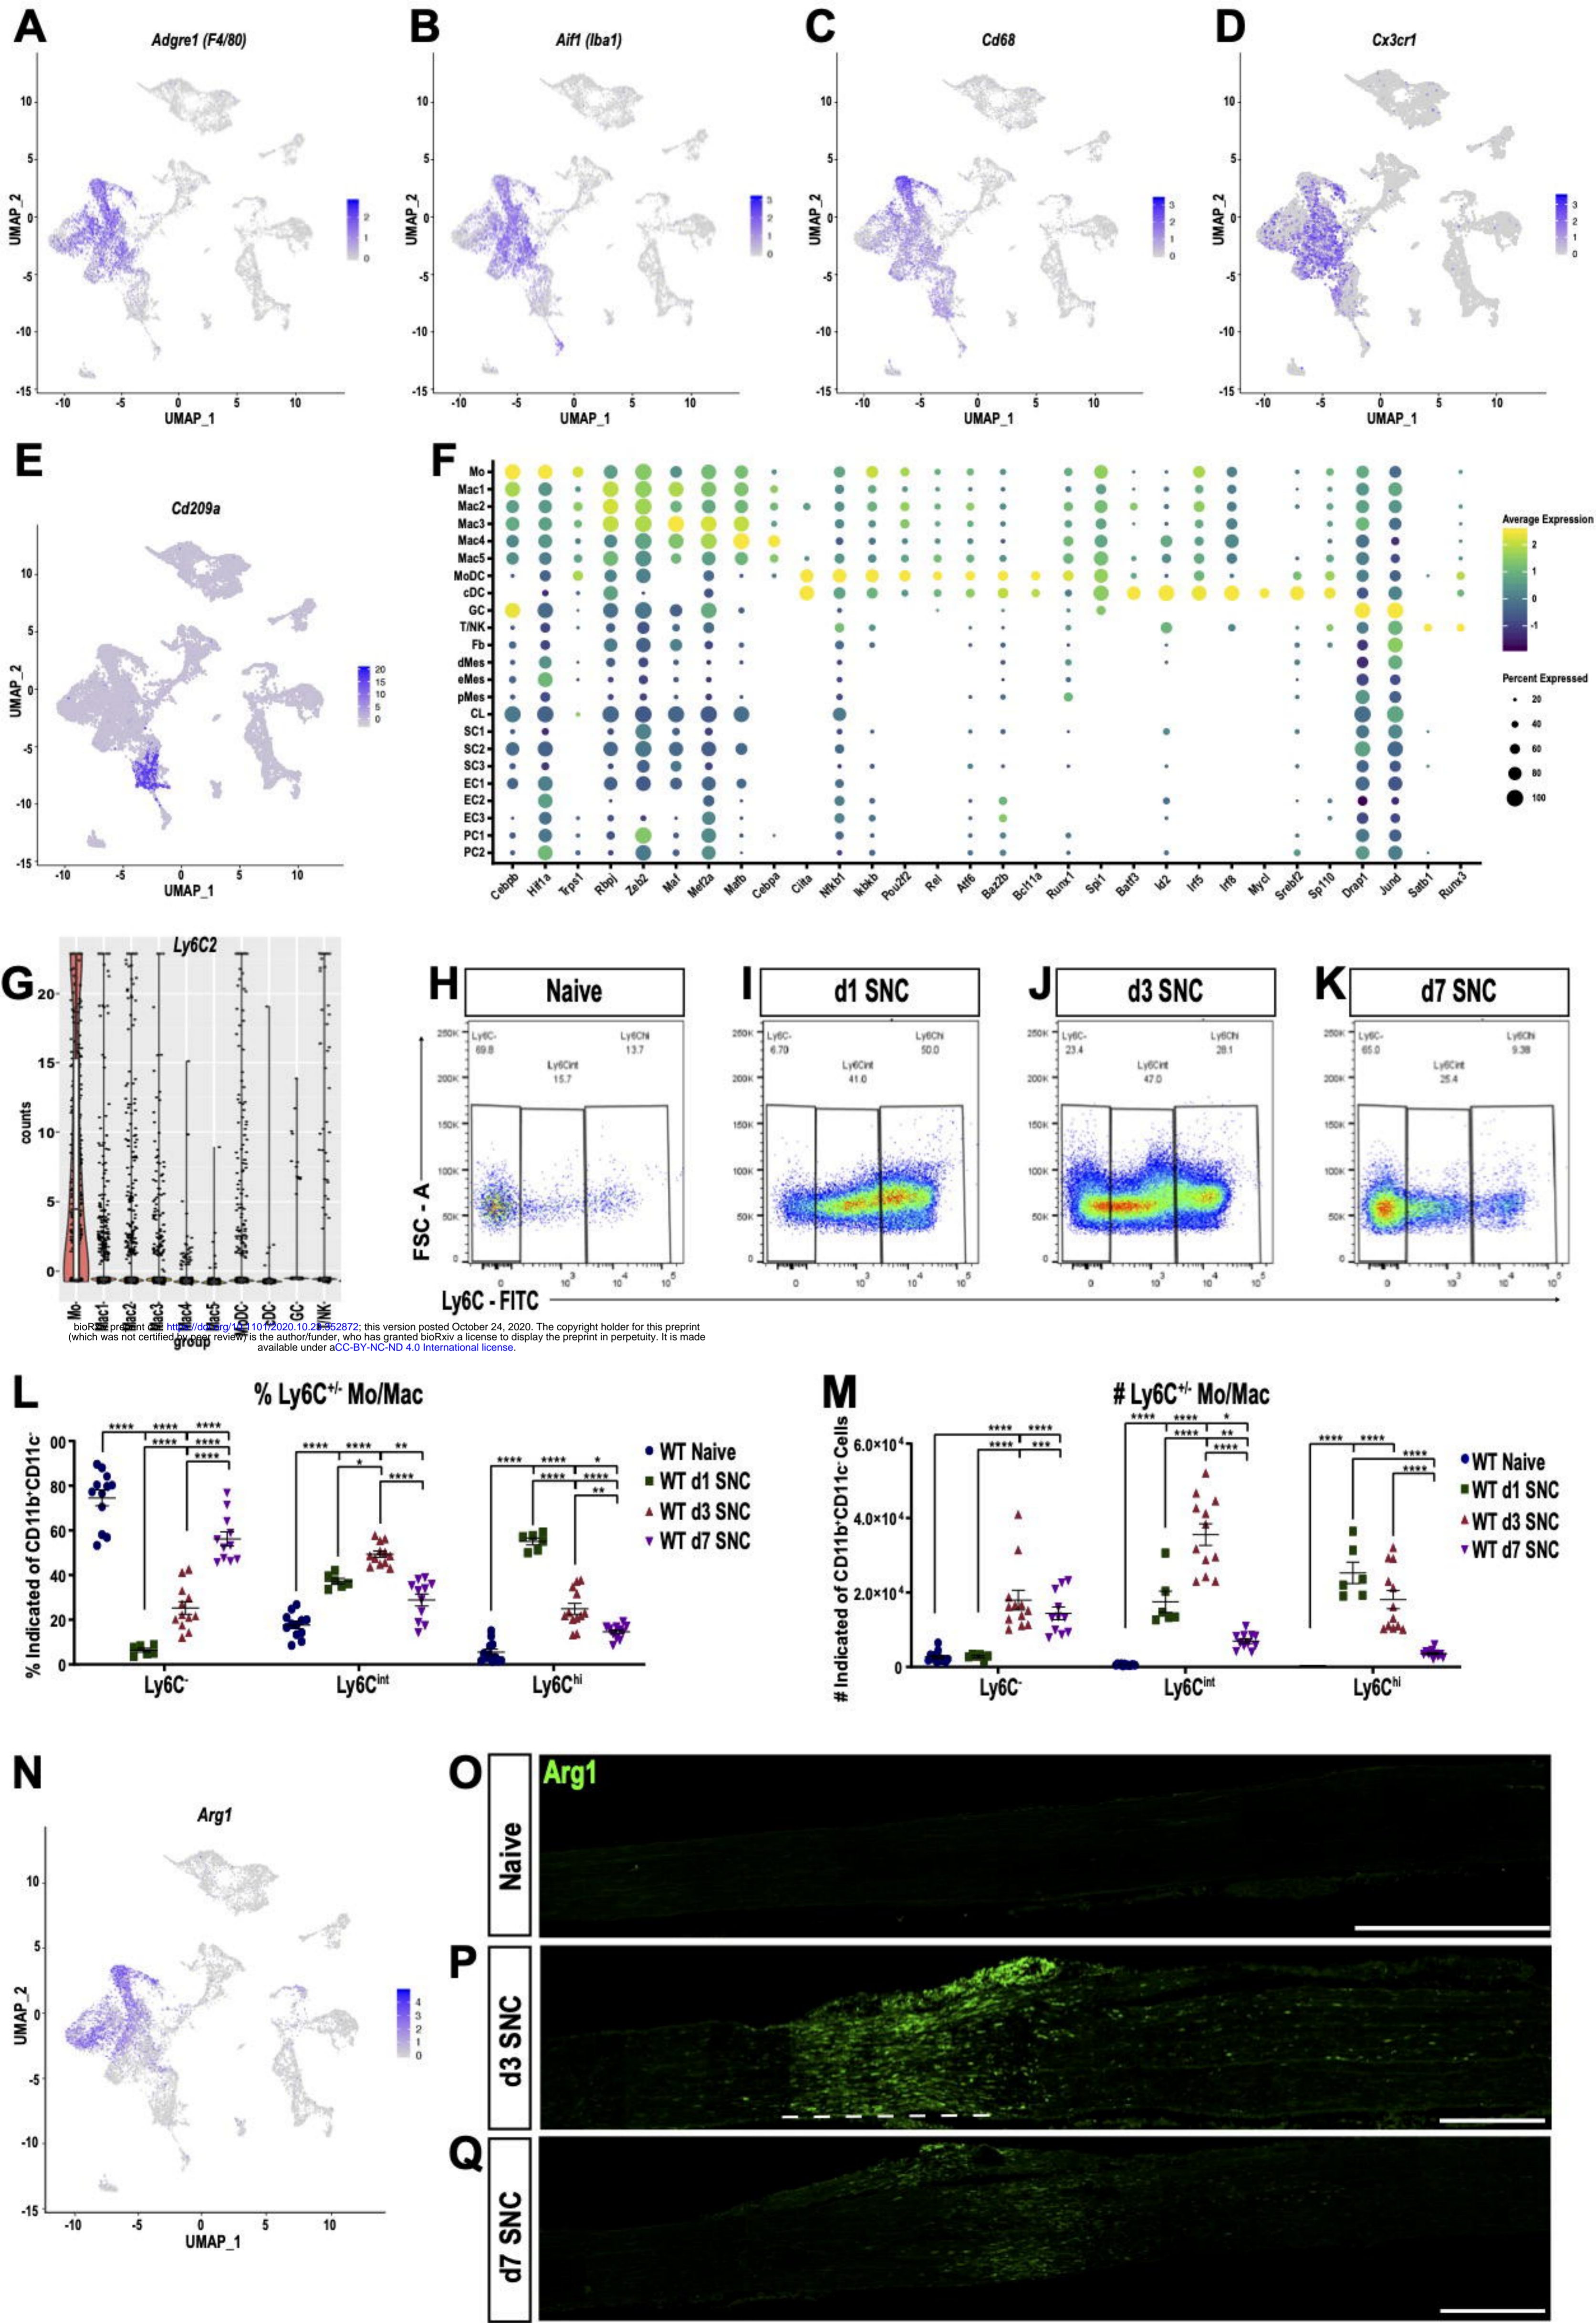



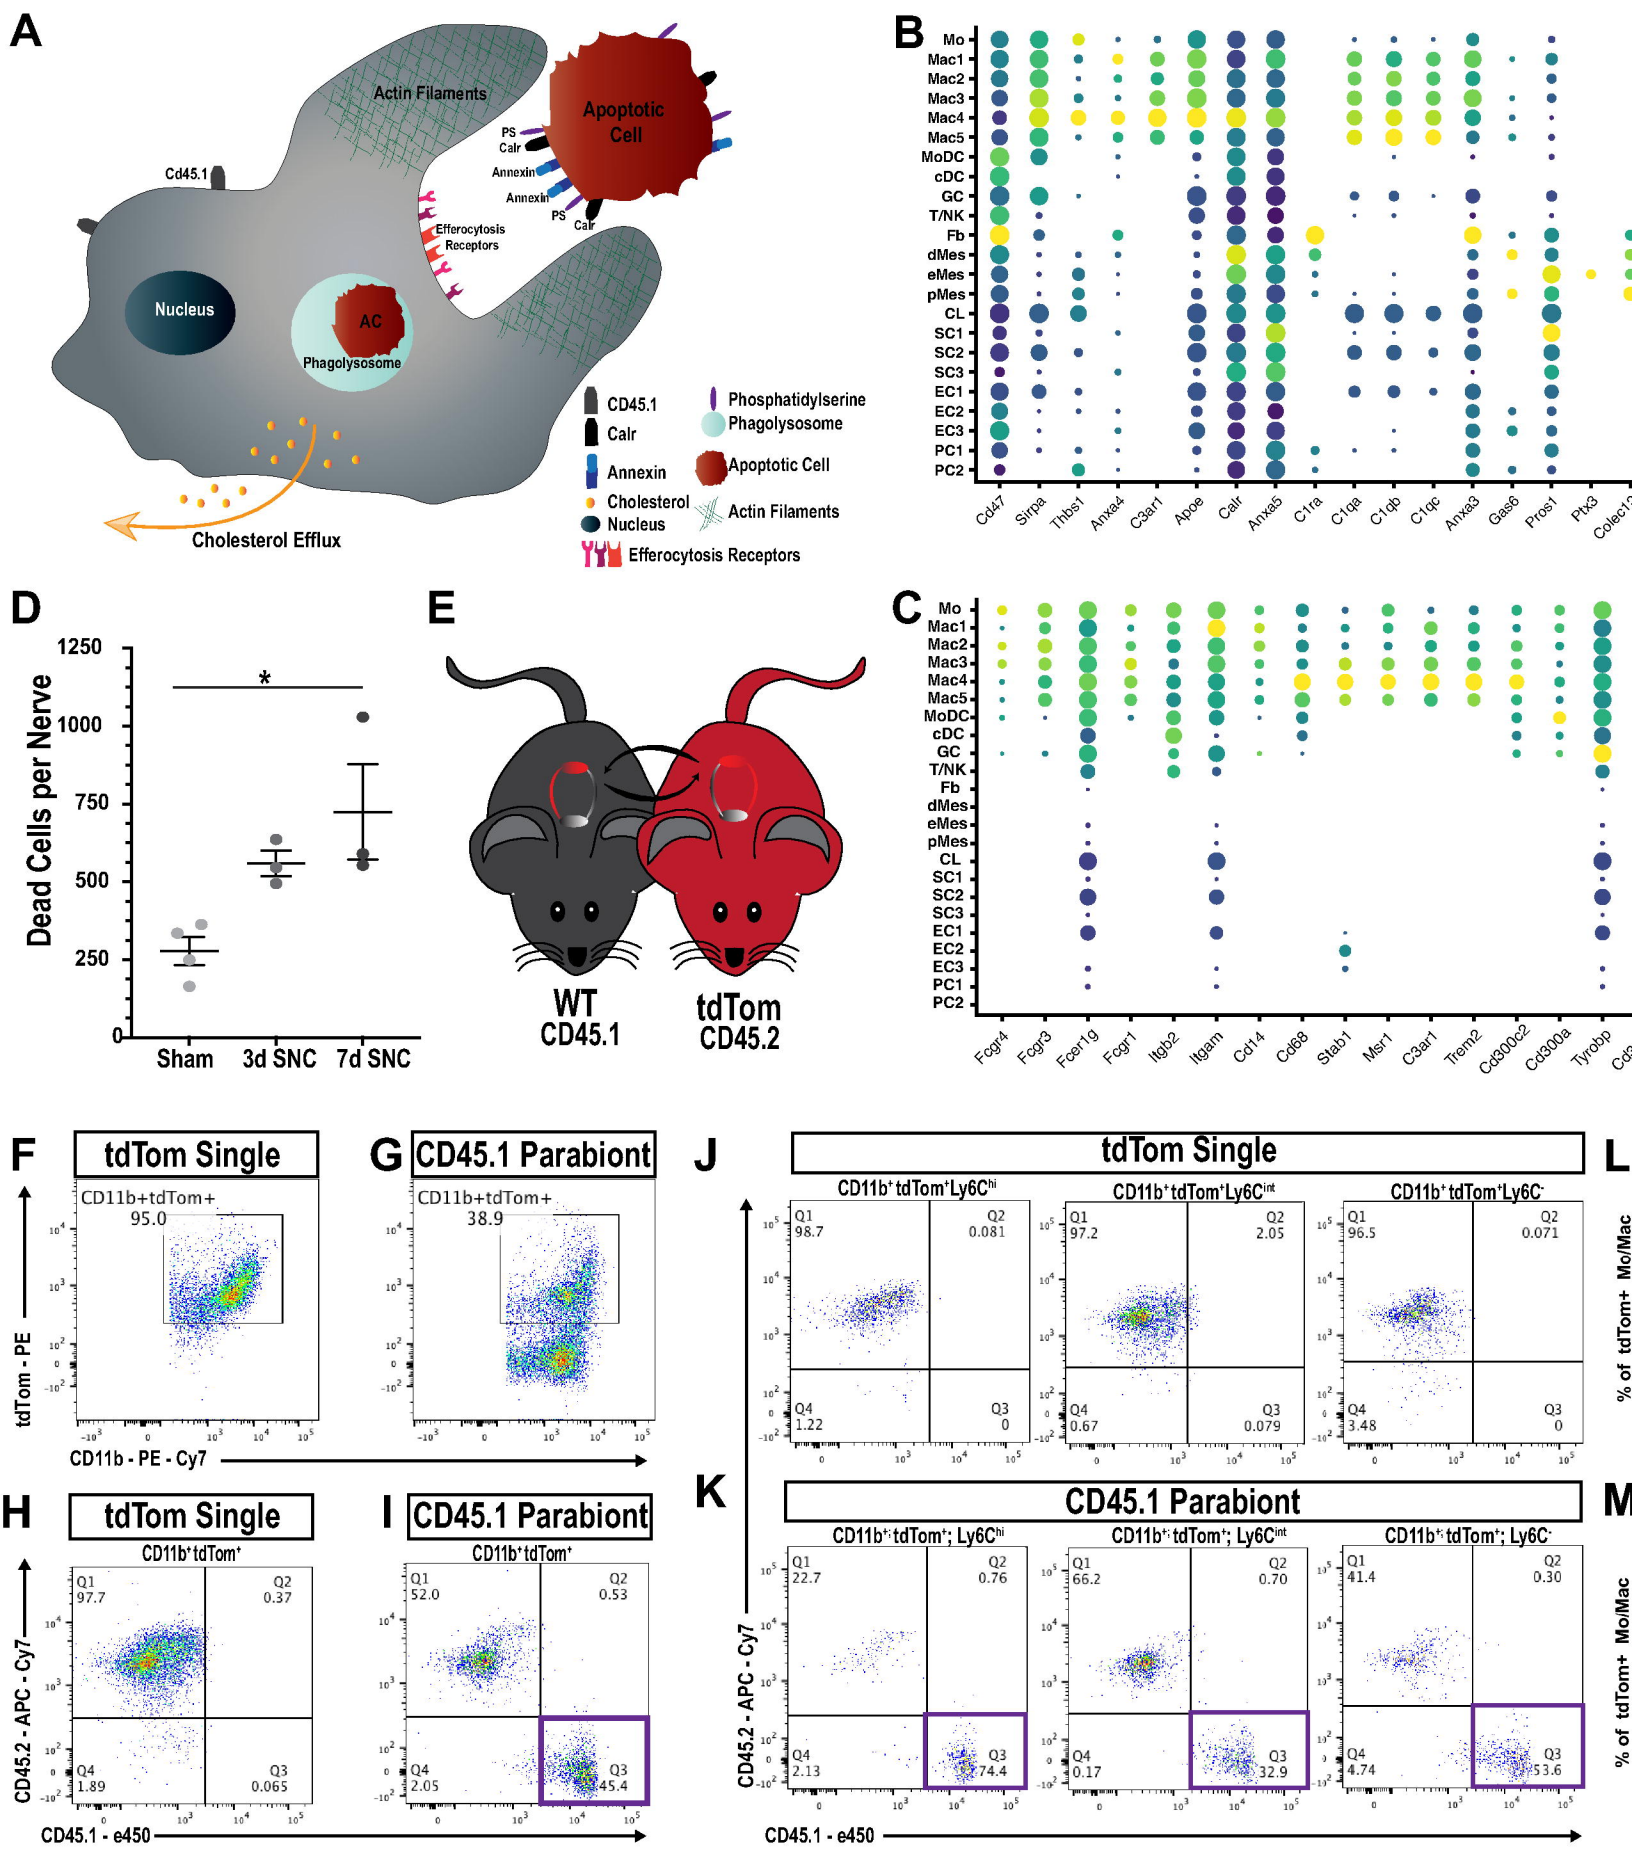

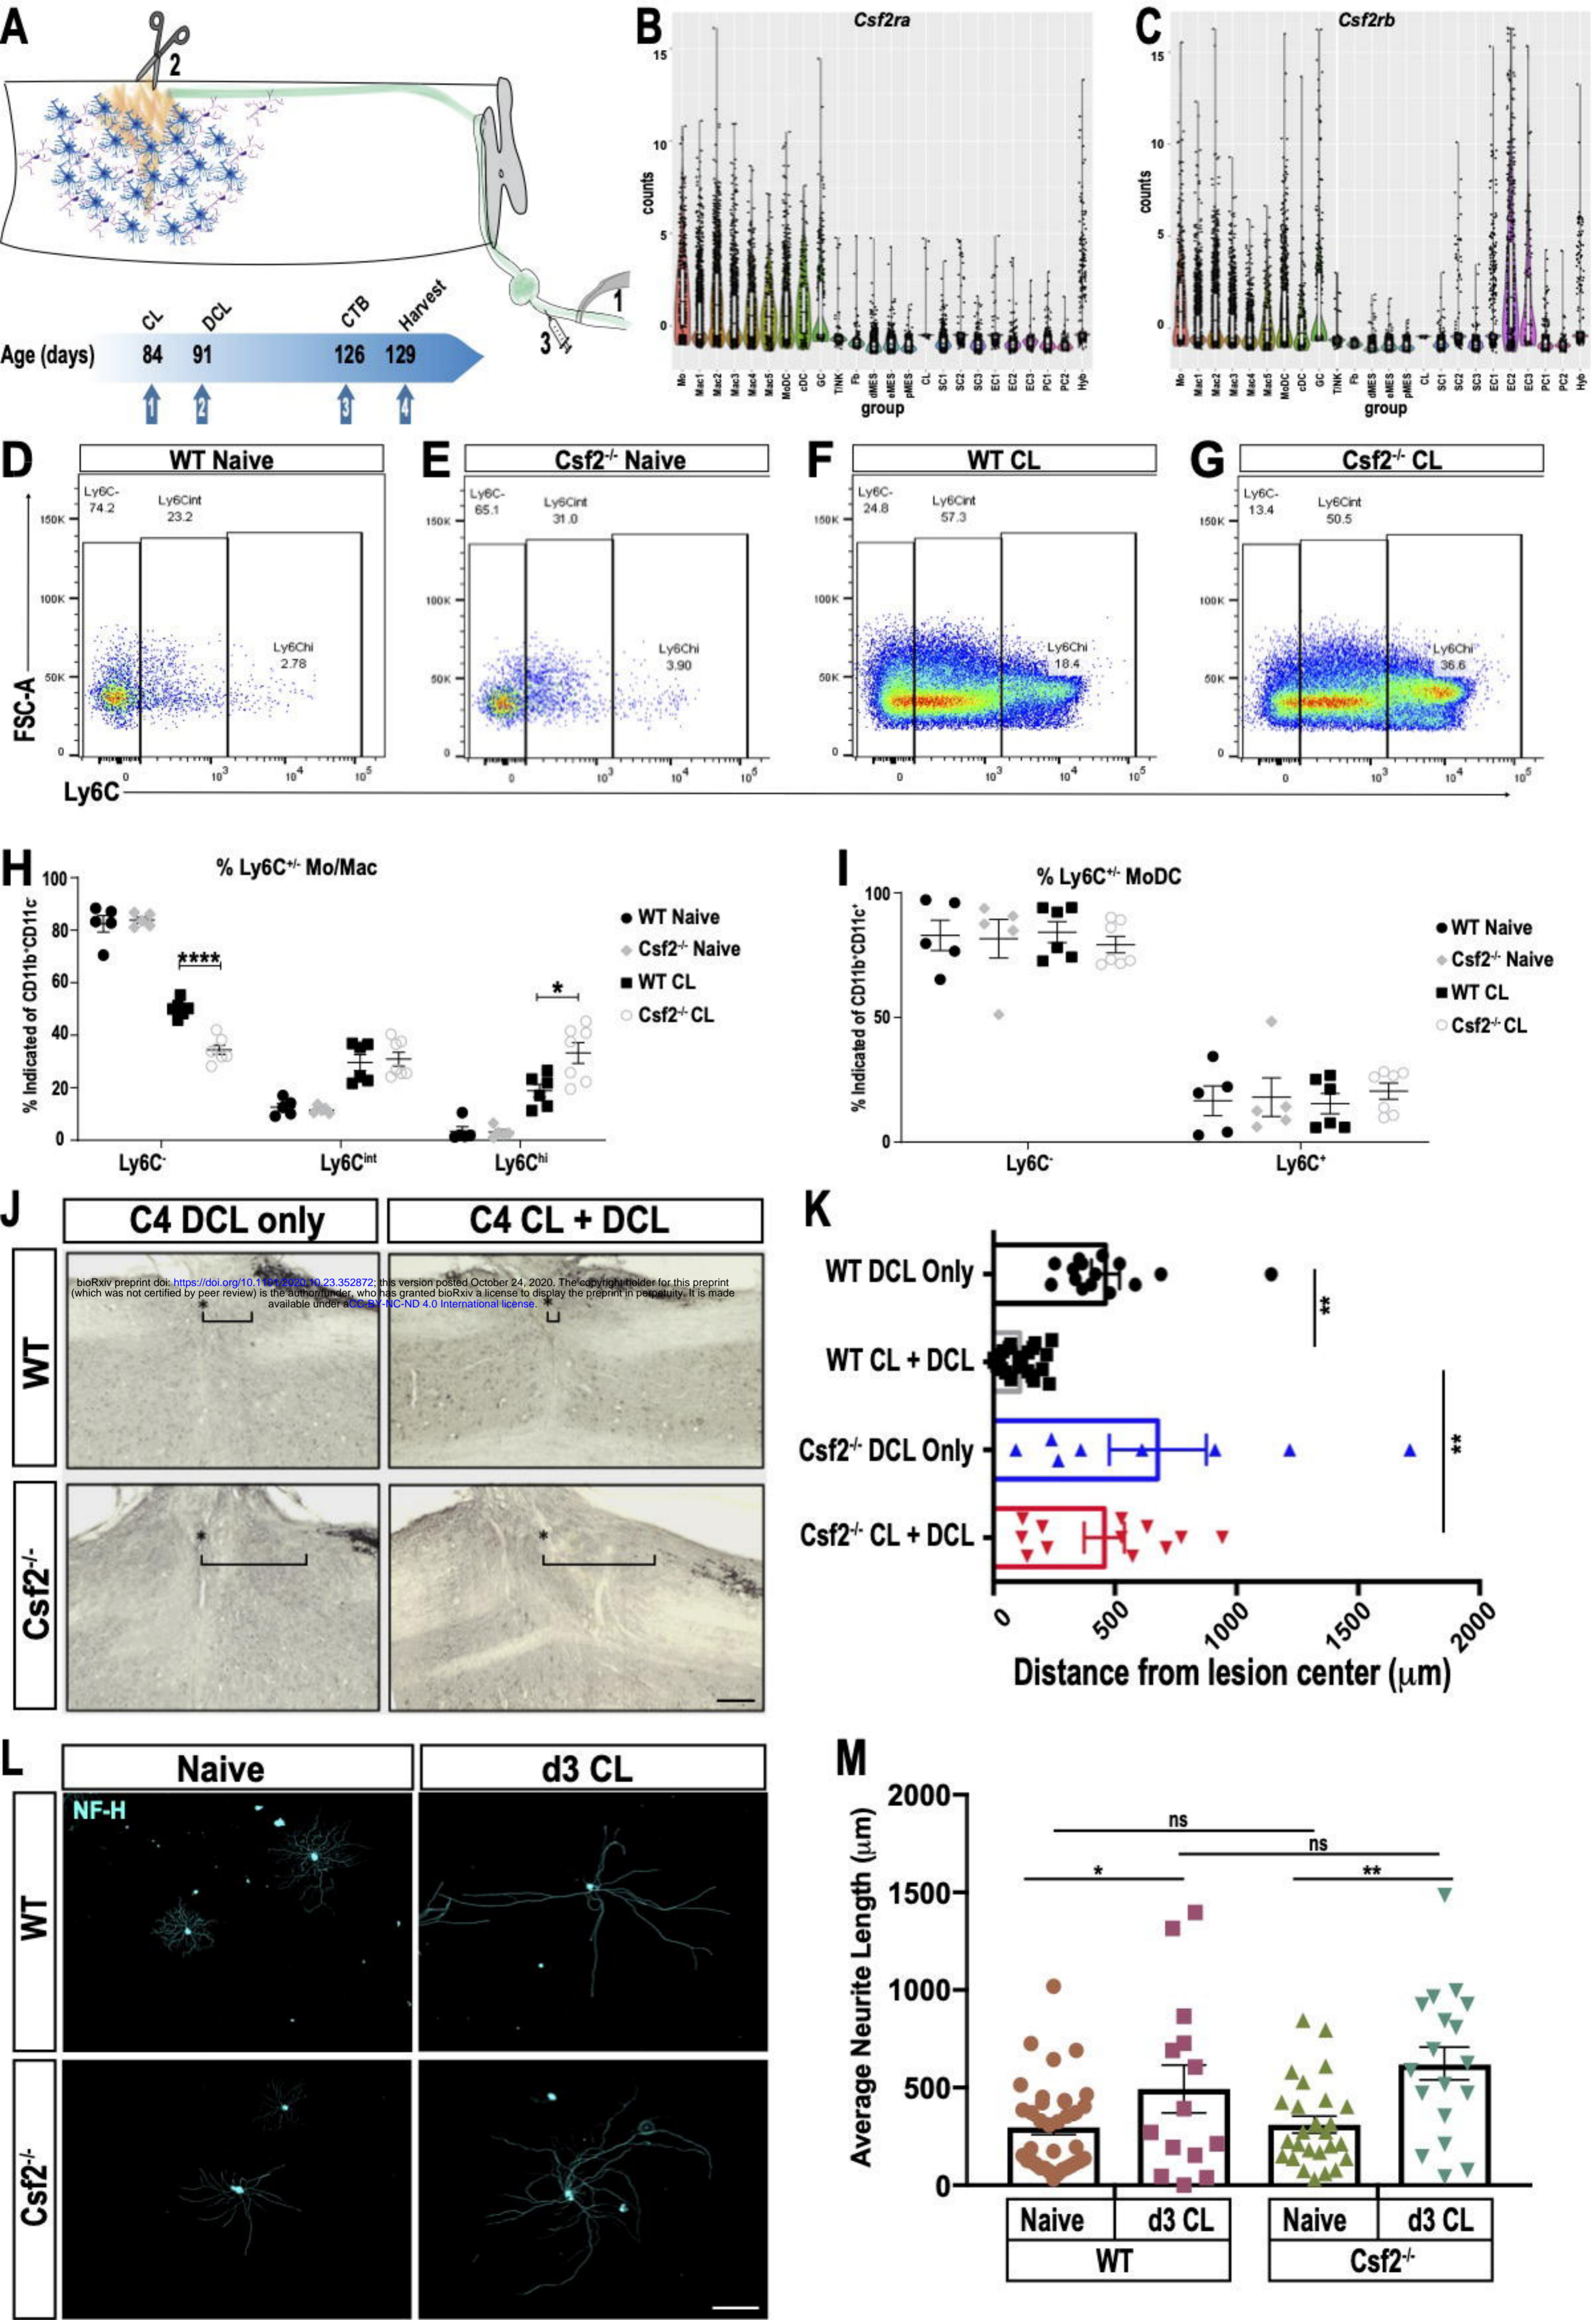

Source: https://www.biorxiv.org/content/10.1101/2020.10.23.352872v1.full.pdf
