# Supplementary material for: Analysis of the Immune Response to Sciatic Nerve Injury Identifies Efferocytosis as a Key Mechanism of Nerve Debridement
Source: bioRxiv preprint, doi:10.1101/2020.10.23.352872, version 2 (2020-10-24)
Supplement: Figure 5 Source data file 1 [file 352872_file03.xlsx]

## Sheet: Sheet1
p_val	avg_logFC	pct.1	pct.2	p_val_adj	cluster	gene
0	1.92401	0.781	0.163	0	Mo	Chil3
0	1.41531	0.65	0.043	0	Mo	Ly6c2
0	1.15337	0.826	0.176	0	Mo	Ifitm6
0	1.10644	0.765	0.105	0	Mo	Hp
0	0.788687	0.589	0.079	0	Mo	Itgal
0	0.667889	0.532	0.055	0	Mo	Klra2
2.14855e-306	0.84261	0.731	0.138	4.00555e-302	Mo	Sirpb1c
2.26468e-276	1.67184	0.909	0.281	4.22204e-272	Mo	Plac8
2.79799e-259	1.21819	0.864	0.286	5.2163e-255	Mo	Gsr
6.18456e-229	0.748582	0.565	0.101	1.15299e-224	Mo	Ms4a4c
6.98111e-220	0.647053	0.704	0.154	1.30149e-215	Mo	Napsa
2.94771e-215	1.14216	0.994	0.613	5.49542e-211	Mo	Coro1a
2.43251e-213	0.916758	0.808	0.237	4.53492e-209	Mo	Lst1
5.25313e-210	1.42191	1	0.681	9.79341e-206	Mo	Lyz2
1.65025e-207	0.759028	0.879	0.254	3.07657e-203	Mo	Plbd1
2.57362e-204	0.695656	0.694	0.173	4.79801e-200	Mo	Sorl1
1.14085e-202	0.83649	0.852	0.29	2.12688e-198	Mo	Ncf2
4.05423e-200	1.03587	0.955	0.435	7.55829e-196	Mo	Ms4a6c
1.18568e-197	0.701103	0.731	0.199	2.21046e-193	Mo	Ncf4
5.67431e-194	0.863216	0.885	0.33	1.05786e-189	Mo	Vsir
5.16054e-193	0.662318	0.431	0.068	9.62079e-189	Mo	Sell
1.59923e-191	0.709751	0.632	0.147	2.98144e-187	Mo	Cytip
3.18173e-184	1.05473	0.998	0.643	5.9317e-180	Mo	Tyrobp
2.12362e-183	0.871049	0.87	0.32	3.95906e-179	Mo	Pirb
6.8485e-180	0.717753	0.804	0.242	1.27677e-175	Mo	Clec4a1
8.81249e-175	0.855722	0.85	0.317	1.64291e-170	Mo	Smpdl3a
2.19462e-174	1.02798	0.923	0.541	4.09144e-170	Mo	Msrb1
9.80867e-174	0.6137	0.652	0.172	1.82863e-169	Mo	Igsf6
6.64776e-173	1.10862	0.994	0.617	1.23934e-168	Mo	Ccr2
4.17845e-171	0.912267	0.99	0.593	7.78988e-167	Mo	Mpeg1
2.22447e-170	0.779283	0.745	0.223	4.14708e-166	Mo	Ms4a6b
1.17153e-169	0.97911	0.994	0.609	2.18409e-165	Mo	Cd52
1.32326e-169	0.888735	0.994	0.605	2.46696e-165	Mo	Alox5ap
1.21002e-168	0.778619	0.891	0.336	2.25585e-164	Mo	Pld4
1.87949e-168	0.622532	0.666	0.182	3.50394e-164	Mo	Bin2
9.61242e-166	0.700218	0.763	0.235	1.79204e-161	Mo	Clec4a3
1.85003e-162	0.831215	0.824	0.313	3.449e-158	Mo	Fyb
5.15683e-160	0.78945	0.897	0.388	9.61388e-156	Mo	Lyn
8.58616e-160	0.984399	0.939	0.567	1.60072e-155	Mo	Cebpb
5.78685e-159	0.848218	0.96	0.602	1.07884e-154	Mo	Samhd1
4.61736e-155	0.990843	0.943	0.543	8.60815e-151	Mo	Cybb
1.40302e-152	0.803846	0.994	0.669	2.61565e-148	Mo	Fam49b
2.23082e-151	0.595359	1	1	4.15891e-147	Mo	Fau
6.68398e-151	0.741227	1	0.961	1.24609e-146	Mo	Psap
1.78121e-149	0.755083	0.852	0.375	3.32071e-145	Mo	Emilin2
2.6225e-148	0.862836	0.982	0.609	4.88912e-144	Mo	Ptprc
3.54138e-146	0.841318	0.996	0.788	6.60219e-142	Mo	Ly6e
2.24045e-145	0.862871	0.998	0.656	4.17687e-141	Mo	Fcer1g
1.16739e-144	0.797602	0.866	0.397	2.17637e-140	Mo	Emb
8.4286e-143	0.683326	0.7	0.222	1.57134e-138	Mo	Pla2g7
7.3569e-141	0.707786	0.856	0.34	1.37155e-136	Mo	Itgb2
9.07796e-139	0.639319	0.804	0.28	1.6924e-134	Mo	Fcgr3
2.18666e-137	0.780091	0.789	0.305	4.0766e-133	Mo	Itga4
2.57838e-137	0.80929	0.909	0.569	4.80687e-133	Mo	Tpd52
1.03249e-136	0.827537	0.87	0.388	1.92488e-132	Mo	F13a1
4.35224e-136	0.632782	0.82	0.313	8.11389e-132	Mo	Gmfg
5.34076e-136	0.761105	0.988	0.697	9.95678e-132	Mo	Arhgdib
1.95633e-135	0.907884	0.97	0.661	3.64718e-131	Mo	Srgn
6.58972e-132	0.638388	0.83	0.326	1.22852e-127	Mo	Spi1
2.48999e-131	0.953399	0.996	0.63	4.6421e-127	Mo	Ccl6
3.7901e-130	0.628466	0.767	0.283	7.06588e-126	Mo	Csf2ra
2.07175e-127	0.655634	0.998	0.86	3.86237e-123	Mo	Actr3
5.49973e-125	0.648378	0.844	0.354	1.02532e-120	Mo	Arhgap30
2.06413e-124	0.686783	0.709	0.249	3.84816e-120	Mo	Ccr1
8.92711e-124	0.728238	1	0.932	1.66428e-119	Mo	Ifitm3
2.18711e-123	0.671922	0.854	0.403	4.07743e-119	Mo	Prkcd
4.3016e-123	0.58791	0.694	0.224	8.01947e-119	Mo	Msr1
8.06804e-123	0.865511	0.988	0.663	1.50413e-118	Mo	Ccl9
1.84423e-119	0.756402	0.994	0.796	3.4382e-115	Mo	S100a4
3.43005e-119	0.611538	0.826	0.337	6.39465e-115	Mo	Rac2
6.80806e-118	0.691969	0.868	0.54	1.26923e-113	Mo	Ptpn1
1.57177e-116	0.603471	0.964	0.757	2.93025e-112	Mo	Taldo1
3.58281e-116	0.803287	0.966	0.662	6.67943e-112	Mo	Gda
3.911e-116	0.722486	1	0.658	7.29127e-112	Mo	Ctss
6.29334e-116	0.665482	0.982	0.588	1.17327e-111	Mo	Itgam
4.26217e-115	0.731711	0.931	0.657	7.94596e-111	Mo	Ifngr1
2.21026e-112	0.653532	0.676	0.254	4.12059e-108	Mo	Gngt2
3.4681e-111	0.618862	0.996	0.78	6.46558e-107	Mo	Fxyd5
4.61566e-111	0.619925	0.976	0.804	8.60498e-107	Mo	Pitpna
3.95143e-110	0.73316	0.994	0.837	7.36665e-106	Mo	Tgfbi
1.27704e-109	0.595602	0.933	0.534	2.38079e-105	Mo	Wfdc17
2.00194e-108	0.705747	0.984	0.831	3.73221e-104	Mo	Zfp36l2
1.06826e-105	0.60481	0.735	0.326	1.99156e-101	Mo	Cmtm7
1.31711e-103	0.594531	0.781	0.343	2.45549e-99	Mo	Tm6sf1
1.33248e-102	0.628208	0.737	0.32	2.48415e-98	Mo	Zfp36
2.22979e-102	0.631846	0.984	0.817	4.15699e-98	Mo	Cyba
2.54575e-101	0.631882	0.802	0.388	4.74604e-97	Mo	Pycard
2.86587e-99	0.604809	0.953	0.823	5.34283e-95	Mo	Prdx5
1.54951e-97	0.625559	1	0.665	2.88875e-93	Mo	Laptm5
6.23702e-97	0.637054	0.63	0.222	1.16277e-92	Mo	Cx3cr1
1.17903e-94	0.636461	0.911	0.642	2.19806e-90	Mo	Btg1
1.50332e-91	0.647276	0.808	0.477	2.80265e-87	Mo	Kdm7a
3.185e-88	0.5911	0.893	0.57	5.93779e-84	Mo	Pid1
8.49669e-83	0.594036	0.996	0.973	1.58404e-78	Mo	Tmsb10
4.33347e-81	0.925338	0.721	0.377	8.0789e-77	Mo	Vcan
4.87126e-70	0.626587	0.931	0.76	9.08149e-66	Mo	Cd44
3.23991e-61	0.69097	0.872	0.763	6.04016e-57	Mo	Hif1a
1.5531e-53	0.687896	0.757	0.517	2.89544e-49	Mo	Ifi27l2a
1.52303e-52	1.29095	0.597	0.346	2.83938e-48	Mo	Thbs1
1.41031e-23	0.644651	0.425	0.253	2.62925e-19	Mo	Tgm2
0	1.42694	0.98	0.799	0	Mac1	Fn1
0	1.38474	0.665	0.204	0	Mac1	Lpl
0	1.3823	0.663	0.212	0	Mac1	Tppp3
0	1.34884	0.712	0.115	0	Mac1	Ltc4s
0	1.31926	1	0.65	0	Mac1	Lyz2
0	1.25725	0.996	0.594	0	Mac1	Ccl6
0	1.16813	0.98	0.55	0	Mac1	Itgam
0	1.09146	0.98	0.693	0	Mac1	Apoe
0	1.0909	0.639	0.187	0	Mac1	Arg1
0	1.08543	0.957	0.599	0	Mac1	Sdc3
0	1.03121	0.962	0.502	0	Mac1	Cybb
0	1.02026	0.477	0.06	0	Mac1	Ccl24
0	0.999017	0.77	0.376	0	Mac1	C1qa
0	0.989824	0.995	0.63	0	Mac1	Ccl9
0	0.970173	0.998	0.827	0	Mac1	Grn
0	0.951325	0.8	0.299	0	Mac1	Ncf1
0	0.927245	0.666	0.261	0	Mac1	Pltp
0	0.91935	0.752	0.273	0	Mac1	Fcgr2b
0	0.901987	0.537	0.131	0	Mac1	Hopx
0	0.890966	0.724	0.307	0	Mac1	C1qc
0	0.885708	0.999	0.625	0	Mac1	Ctss
0	0.884607	0.913	0.534	0	Mac1	Cebpb
0	0.861852	1	0.939	0	Mac1	B2m
0	0.851979	1	0.955	0	Mac1	Gpx1
0	0.838044	0.976	0.631	0	Mac1	Gda
0	0.820536	0.594	0.187	0	Mac1	Pf4
0	0.804957	0.736	0.222	0	Mac1	C3ar1
0	0.799285	1	0.957	0	Mac1	Psap
0	0.798116	0.711	0.226	0	Mac1	Cd84
0	0.794791	0.661	0.182	0	Mac1	Ptafr
0	0.787902	0.995	0.923	0	Mac1	Crip1
0	0.773273	0.901	0.557	0	Mac1	Maf
0	0.768574	0.649	0.265	0	Mac1	Klf2
0	0.764553	0.534	0.158	0	Mac1	Ednrb
0	0.758406	0.703	0.284	0	Mac1	Smpdl3a
0	0.753209	1	0.974	0	Mac1	Ctsb
0	0.749865	0.913	0.573	0	Mac1	Samhd1
0	0.749592	1	0.632	0	Mac1	Laptm5
0	0.743609	0.976	0.57	0	Mac1	Alox5ap
0	0.737187	0.643	0.209	0	Mac1	Clec4a1
0	0.732899	0.929	0.588	0	Mac1	Kctd12
0	0.72393	0.979	0.817	0	Mac1	Atp2b1
0	0.703151	0.672	0.248	0	Mac1	Mpp1
0	0.689321	0.988	0.801	0	Mac1	Dazap2
0	0.679217	1	0.832	0	Mac1	H2-D1
0	0.678957	0.526	0.18	0	Mac1	Pygl
0	0.677408	0.952	0.661	0	Mac1	Rbpj
0	0.67529	0.991	0.845	0	Mac1	Rap1b
0	0.66639	0.826	0.414	0	Mac1	Csf1r
0	0.652096	0.997	0.97	0	Mac1	Ahnak
0	0.64561	0.948	0.549	0	Mac1	Cd53
0	0.634808	0.988	0.872	0	Mac1	Lamp2
0	0.634452	0.991	0.78	0	Mac1	H2-K1
0	0.629479	1	0.963	0	Mac1	Lamp1
0	0.613661	0.997	0.906	0	Mac1	Npc2
0	0.606463	0.997	0.898	0	Mac1	Arpc5
0	0.605326	0.546	0.179	0	Mac1	Cd14
0	0.602259	0.572	0.204	0	Mac1	Mtss1
0	0.559713	0.995	0.869	0	Mac1	Sdcbp
0	0.55393	0.994	0.931	0	Mac1	Capzb
0	0.544004	0.533	0.166	0	Mac1	Dok2
2.06335e-307	0.59182	0.525	0.184	3.8467e-303	Mac1	Camkk2
3.83937e-306	0.592824	0.641	0.225	7.15774e-302	Mac1	Trem2
3.979e-302	0.648511	0.854	0.46	7.41805e-298	Mac1	Mafb
1.10752e-296	0.624208	0.815	0.485	2.06475e-292	Mac1	Adam15
9.45336e-295	0.661426	0.704	0.309	1.76239e-290	Mac1	Itgb2
2.32973e-293	0.550094	0.996	0.818	4.34332e-289	Mac1	Zeb2
6.49209e-293	0.572949	0.978	0.806	1.21032e-288	Mac1	Mcl1
1.84292e-290	0.614926	0.349	0.078	3.43575e-286	Mac1	Folr2
5.86998e-290	0.556325	0.823	0.513	1.09434e-285	Mac1	Glul
1.72893e-289	0.789184	0.926	0.744	3.22325e-285	Mac1	Cd44
4.14001e-289	0.700707	0.805	0.411	7.71822e-285	Mac1	C1qb
2.51072e-288	0.748736	0.442	0.123	4.68074e-284	Mac1	Cd36
6.60581e-288	0.559881	0.973	0.671	1.23152e-283	Mac1	Arhgdib
1.61788e-286	0.544164	0.657	0.275	3.01621e-282	Mac1	Naaa
4.52908e-280	0.661812	0.695	0.385	8.44357e-276	Mac1	Idh1
3.60776e-279	0.678686	0.982	0.778	6.72595e-275	Mac1	S100a4
3.36543e-278	0.55122	0.93	0.69	6.27417e-274	Mac1	Sat1
1.71623e-275	0.584737	0.699	0.307	3.19957e-271	Mac1	Plek
1.0327e-274	0.881694	0.73	0.36	1.92526e-270	Mac1	F13a1
7.3597e-273	0.555406	0.644	0.25	1.37207e-268	Mac1	Fcgr3
5.15972e-270	0.620831	0.871	0.502	9.61927e-266	Mac1	Ly86
1.23881e-267	0.558133	0.974	0.669	2.30951e-263	Mac1	Ucp2
2.04064e-265	0.623157	0.724	0.376	3.80436e-261	Mac1	Prkcd
2.41548e-265	0.953425	0.846	0.506	4.50317e-261	Mac1	Wfdc17
4.39206e-264	0.567074	0.96	0.68	8.18813e-260	Mac1	Lgmn
5.05555e-263	0.59509	0.751	0.451	9.42506e-259	Mac1	Dusp3
7.27029e-262	0.556455	0.287	0.056	1.3554e-257	Mac1	Cbr2
1.83617e-250	0.545479	0.568	0.213	3.42316e-246	Mac1	Adgre1
1.33256e-238	0.600824	0.92	0.59	2.4843e-234	Mac1	Ccr2
1.01376e-232	0.648334	0.753	0.482	1.88994e-228	Mac1	Adgre5
1.27789e-228	0.590908	0.999	0.982	2.38238e-224	Mac1	Itm2b
7.12989e-225	1.00624	0.954	0.763	1.32923e-220	Mac1	Selenop
3.71777e-224	0.573	0.985	0.859	6.93104e-220	Mac1	Serinc3
9.19797e-218	0.558157	0.452	0.147	1.71478e-213	Mac1	Chil3
6.18018e-188	0.679246	0.63	0.391	1.15217e-183	Mac1	Acly
1.24922e-170	0.612651	0.769	0.564	2.32892e-166	Mac1	Ecm1
3.90224e-155	0.575233	0.604	0.361	7.27495e-151	Mac1	Emilin2
3.42919e-150	0.576529	0.749	0.494	6.39305e-146	Mac1	Ifi27l2a
5.13405e-133	0.808813	0.425	0.19	9.57142e-129	Mac1	Hmox1
0	1.62535	1	0.513	0	Mac2	Cd74
0	1.59572	0.994	0.401	0	Mac2	H2-Aa
0	1.44988	0.997	0.401	0	Mac2	H2-Ab1
0	1.42615	0.985	0.323	0	Mac2	H2-Eb1
0	1.24922	0.993	0.597	0	Mac2	Ccr2
0	1.08931	0.843	0.157	0	Mac2	H2-DMb1
0	1.05538	0.997	0.664	0	Mac2	Lyz2
0	1.0355	0.982	0.664	0	Mac2	Ctsc
0	1.02637	0.849	0.202	0	Mac2	H2-DMa
0	1.01484	0.983	0.611	0	Mac2	Ccl6
0	0.974381	0.855	0.343	0	Mac2	Mrc1
0	0.851982	0.92	0.422	0	Mac2	Csf1r
0	0.843951	0.999	0.64	0	Mac2	Ctss
0	0.843046	0.98	0.646	0	Mac2	Ccl9
0	0.839135	0.65	0.198	0	Mac2	Cx3cr1
0	0.8259	0.975	0.59	0	Mac2	Cd52
0	0.8214	0.998	0.637	0	Mac2	Fcer1g
0	0.818814	0.705	0.231	0	Mac2	Aif1
0	0.812897	1	0.647	0	Mac2	Laptm5
0	0.809866	0.944	0.522	0	Mac2	Cybb
0	0.809047	0.958	0.51	0	Mac2	Ly86
0	0.79038	0.839	0.224	0	Mac2	Plbd1
0	0.774913	0.825	0.286	0	Mac2	Fcgr2b
0	0.773232	0.978	0.594	0	Mac2	Coro1a
0	0.77196	0.95	0.608	0	Mac2	Gm2a
0	0.755384	0.875	0.308	0	Mac2	Pld4
0	0.739596	0.8	0.252	0	Mac2	Fcgr3
0	0.714282	0.775	0.269	0	Mac2	Rassf4
0	0.712866	0.763	0.281	0	Mac2	Naaa
0	0.702261	1	0.959	0	Mac2	Psap
0	0.701106	0.945	0.572	0	Mac2	Unc93b1
0	0.694629	0.747	0.208	0	Mac2	Clec4a3
0	0.691638	0.872	0.363	0	Mac2	Cyth4
0	0.671805	0.663	0.181	0	Mac2	Clec4a2
0	0.657397	0.812	0.306	0	Mac2	Vsir
0	0.609732	0.711	0.22	0	Mac2	Clec4a1
6.60926e-302	0.582516	0.681	0.219	1.23216e-297	Mac2	Cysltr1
1.52511e-296	0.611645	0.728	0.261	2.84327e-292	Mac2	Csf2ra
1.63583e-293	0.559206	0.588	0.168	3.04967e-289	Mac2	Cyp4f18
3.86709e-293	0.593162	0.811	0.317	7.20942e-289	Mac2	Tm6sf1
4.32997e-292	0.684067	0.985	0.681	8.07237e-288	Mac2	Ucp2
1.40016e-291	0.620554	0.795	0.297	2.61031e-287	Mac2	Pirb
5.7036e-287	0.666137	0.646	0.209	1.06332e-282	Mac2	Clec12a
3.75049e-285	0.690405	0.849	0.389	6.99204e-281	Mac2	Cfp
8.93337e-276	0.618683	0.582	0.176	1.66545e-271	Mac2	Dok2
2.06212e-273	0.56766	0.832	0.329	3.84442e-269	Mac2	Arhgap30
3.0169e-269	0.660242	0.966	0.574	5.6244e-265	Mac2	Mpeg1
1.0309e-268	0.691346	0.932	0.675	1.9219e-264	Mac2	Rbpj
1.49785e-267	0.601309	0.676	0.231	2.79244e-263	Mac2	Ccr5
3.02742e-267	0.664877	0.994	0.625	5.64403e-263	Mac2	Tyrobp
8.22974e-266	0.582432	0.967	0.591	1.53427e-261	Mac2	Ptprc
1.72827e-261	0.631664	0.976	0.683	3.22201e-257	Mac2	Arhgdib
3.02196e-260	0.665294	0.683	0.265	5.63384e-256	Mac2	Olfm1
3.29689e-260	0.554107	0.783	0.303	6.14638e-256	Mac2	Spi1
3.0388e-258	0.74351	0.916	0.603	5.66523e-254	Mac2	Kctd12
4.14854e-258	0.73507	0.943	0.648	7.73412e-254	Mac2	Gda
1.76265e-257	0.596813	0.958	0.678	3.28611e-253	Mac2	Ctsh
1.55529e-256	0.556227	0.743	0.283	2.89953e-252	Mac2	Itga4
1.13997e-254	0.535582	0.792	0.314	2.12524e-250	Mac2	Rac2
9.22618e-254	0.626934	0.964	0.587	1.72004e-249	Mac2	Alox5ap
5.73602e-253	0.51504	0.662	0.233	1.06937e-248	Mac2	Irf5
1.37304e-251	0.519576	0.721	0.271	2.55976e-247	Mac2	Ncf2
5.06594e-250	0.633864	0.972	0.691	9.44444e-246	Mac2	Cotl1
4.01104e-247	0.569395	0.966	0.568	7.47778e-243	Mac2	Itgam
1.41213e-246	0.580501	0.999	0.999	2.63264e-242	Mac2	Tmsb4x
4.19628e-245	0.549836	0.43	0.106	7.82312e-241	Mac2	Slamf9
5.43845e-245	0.634479	0.889	0.553	1.01389e-240	Mac2	Pid1
6.39097e-245	0.563628	0.995	0.853	1.19147e-240	Mac2	Actr3
8.67416e-241	1.09042	0.775	0.43	1.61712e-236	Mac2	C1qb
2.66235e-239	0.570911	0.948	0.566	4.96343e-235	Mac2	Cd53
2.1769e-231	0.560615	0.967	0.654	4.05839e-227	Mac2	Fam49b
1.45932e-228	0.527584	0.999	0.956	2.72062e-224	Mac2	Gpx1
4.23259e-228	0.692963	0.683	0.276	7.89082e-224	Mac2	Pltp
1.13011e-226	0.544666	0.793	0.37	2.10686e-222	Mac2	Lyn
9.4988e-222	0.548598	0.99	0.769	1.77086e-217	Mac2	Fxyd5
3.63678e-218	0.538461	0.94	0.608	6.78006e-214	Mac2	Sirpa
1.00408e-215	0.576412	0.992	0.825	1.8719e-211	Mac2	Zeb2
3.57316e-214	0.702999	0.794	0.421	6.66144e-210	Mac2	Ms4a6c
1.66394e-213	0.520468	0.655	0.247	3.10207e-209	Mac2	St8sia4
3.88361e-209	0.546487	0.979	0.808	7.24021e-205	Mac2	Cyba
2.79811e-207	0.564132	0.524	0.167	5.21652e-203	Mac2	Ifitm6
1.19517e-206	0.585079	0.893	0.619	2.22815e-202	Mac2	Sdc3
1.51675e-205	0.534962	0.78	0.385	2.82768e-201	Mac2	Prkcd
9.66084e-204	0.541321	0.974	0.635	1.80107e-199	Mac2	Lcp1
6.63921e-203	0.533689	0.998	0.839	1.23775e-198	Mac2	H2-D1
4.4882e-202	0.545508	0.898	0.645	8.36734e-198	Mac2	Ifngr1
2.2263e-201	0.646319	0.853	0.603	4.15049e-197	Mac2	Tmem176b
4.23858e-199	0.51677	0.613	0.233	7.90199e-195	Mac2	Cd300c2
5.30991e-198	0.576908	0.591	0.225	9.89926e-194	Mac2	Lst1
8.36894e-198	0.800598	0.693	0.326	1.56022e-193	Mac2	C1qc
2.65982e-193	0.523027	0.693	0.297	4.9587e-189	Mac2	Fyb
4.57213e-179	0.542408	0.842	0.507	8.52381e-175	Mac2	Ptpn18
3.03789e-154	0.940741	0.681	0.4	5.66354e-150	Mac2	C1qa
8.27979e-151	0.956831	0.854	0.715	1.5436e-146	Mac2	Apoe
8.46067e-147	0.652272	0.695	0.378	1.57732e-142	Mac2	F13a1
8.12258e-143	0.52237	0.899	0.664	1.51429e-138	Mac2	Lsp1
5.03369e-142	0.709632	0.763	0.503	9.38431e-138	Mac2	Ifi27l2a
8.48441e-128	0.776736	0.52	0.236	1.58175e-123	Mac2	Lpl
5.11292e-116	0.660997	0.877	0.777	9.53202e-112	Mac2	Selenop
2.30365e-60	0.627161	0.976	0.928	4.29469e-56	Mac2	Crip1
0	1.47464	1	0.688	0	Mac3	Lgmn
0	1.37077	0.862	0.342	0	Mac3	Mrc1
0	1.27357	1	0.662	0	Mac3	Ctsc
0	1.24699	0.955	0.541	0	Mac3	Dab2
0	1.20776	0.898	0.36	0	Mac3	F13a1
0	1.08723	0.978	0.564	0	Mac3	Maf
0	1.07111	0.705	0.194	0	Mac3	Pf4
0	1.0642	0.72	0.192	0	Mac3	Cx3cr1
0	1.06317	0.995	0.767	0	Mac3	Selenop
0	1.03532	0.98	0.598	0	Mac3	Ccr2
0	1.03118	0.997	0.703	0	Mac3	Apoe
0	1.00854	0.7	0.211	0	Mac3	Stab1
0	0.932948	0.776	0.225	0	Mac3	Aif1
0	0.92068	0.995	0.611	0	Mac3	Ccl6
0	0.919739	0.994	0.813	0	Mac3	BC005537
0	0.918814	0.953	0.51	0	Mac3	Ly86
0	0.901917	0.926	0.469	0	Mac3	Mafb
0	0.871521	0.506	0.097	0	Mac3	Fcrls
0	0.867212	0.902	0.412	0	Mac3	Ms4a6c
0	0.865192	0.998	0.633	0	Mac3	Lcp1
0	0.862196	0.662	0.221	0	Mac3	Cd38
0	0.830608	0.589	0.111	0	Mac3	Ms4a7
0	0.814229	0.718	0.224	0	Mac3	Ccr1
0	0.814227	0.733	0.196	0	Mac3	Ms4a6b
0	0.793845	0.968	0.605	0	Mac3	Sirpa
0	0.775005	0.712	0.198	0	Mac3	Msr1
0	0.774819	0.734	0.213	0	Mac3	Adgre1
0	0.773705	0.779	0.239	0	Mac3	C3ar1
0	0.754442	0.761	0.232	0	Mac3	Trem2
0	0.752703	0.705	0.201	0	Mac3	C5ar1
0	0.747242	0.991	0.903	0	Mac3	Cltc
0	0.725923	0.686	0.198	0	Mac3	Lair1
0	0.66971	0.64	0.193	0	Mac3	Ms4a6d
0	0.668302	0.657	0.182	0	Mac3	Fcgr1
0	0.650856	0.443	0.083	0	Mac3	Mmp9
4.89362e-307	0.788039	0.865	0.427	9.12318e-303	Mac3	Csf1r
1.80422e-302	0.71707	0.993	0.863	3.36361e-298	Mac3	Serinc3
8.45181e-295	0.804376	0.56	0.15	1.57567e-290	Mac3	Chil3
9.50736e-292	0.624802	0.301	0.044	1.77246e-287	Mac3	Ccl12
1.0768e-290	0.579923	0.613	0.185	2.00747e-286	Mac3	Clec4a2
3.64347e-288	0.726324	0.819	0.37	6.79252e-284	Mac3	Cd93
4.53711e-285	0.657904	0.999	0.833	8.45853e-281	Mac3	Grn
1.02077e-283	0.764081	0.648	0.205	1.90302e-279	Mac3	Arg1
1.52898e-280	0.743403	0.988	0.646	2.85047e-276	Mac3	Ccl9
6.07011e-279	0.633547	0.977	0.567	1.13165e-274	Mac3	Itgam
1.53189e-278	0.673893	0.971	0.653	2.8559e-274	Mac3	Fam49b
1.30222e-277	0.738073	0.998	0.638	2.42773e-273	Mac3	Fcer1g
4.97072e-273	0.682255	0.707	0.261	9.26692e-269	Mac3	Fcgr3
2.1822e-267	0.649733	0.959	0.672	4.06827e-263	Mac3	Rbpj
4.5195e-265	0.680492	0.999	0.664	8.42571e-261	Mac3	Lyz2
1.77272e-263	0.690608	1	0.64	3.30489e-259	Mac3	Ctss
1.11584e-259	0.70517	0.895	0.553	2.08026e-255	Mac3	Pid1
1.57942e-257	0.619185	0.995	0.874	2.94451e-253	Mac3	Sdcbp
7.28712e-254	0.638455	0.632	0.221	1.35854e-249	Mac3	Lst1
6.98188e-252	0.619815	0.978	0.573	1.30163e-247	Mac3	Mpeg1
6.98682e-252	0.628689	0.722	0.294	1.30255e-247	Mac3	Fyb
4.57299e-248	0.919077	0.729	0.323	8.52542e-244	Mac3	C1qc
1.10932e-247	0.669671	0.94	0.681	2.06811e-243	Mac3	Mef2a
8.72748e-247	0.583049	0.691	0.286	1.62706e-242	Mac3	Bmp2k
6.3281e-246	0.607569	0.993	0.85	1.17975e-241	Mac3	Rap1b
2.47843e-244	0.562509	0.598	0.199	4.62054e-240	Mac3	Cd300ld
6.69836e-244	0.521143	0.66	0.248	1.24877e-239	Mac3	Arrb2
7.4492e-243	0.603228	0.613	0.212	1.38875e-238	Mac3	Clec12a
7.32663e-242	0.554191	0.614	0.226	1.3659e-237	Mac3	Rab3il1
9.17604e-241	0.615647	1	0.975	1.71069e-236	Mac3	Ctsb
1.36834e-240	0.637864	0.732	0.294	2.551e-236	Mac3	Fcgr2b
2.44313e-240	0.570655	1	0.999	4.55473e-236	Mac3	Tmsb4x
1.04367e-238	0.581164	0.918	0.634	1.94572e-234	Mac3	Rnf130
1.01966e-237	0.681717	0.855	0.506	1.90096e-233	Mac3	Ptpn18
1.65481e-236	0.528726	0.65	0.226	3.08506e-232	Mac3	Clec4a1
1.0906e-235	0.598603	0.925	0.574	2.0332e-231	Mac3	Unc93b1
2.98507e-233	0.703311	0.991	0.829	5.56506e-229	Mac3	Tgfbi
1.6215e-232	0.58613	0.989	0.69	3.02296e-228	Mac3	Cotl1
1.47585e-230	0.623671	0.809	0.392	2.75142e-226	Mac3	Cfp
4.09701e-230	0.581741	0.879	0.554	7.63805e-226	Mac3	Tpd52
6.96347e-230	1.0113	0.76	0.393	1.2982e-225	Mac3	C1qa
3.92631e-226	0.91932	0.801	0.428	7.31981e-222	Mac3	C1qb
1.95556e-225	0.658827	0.952	0.647	3.64575e-221	Mac3	Gda
1.16935e-224	0.615872	1	0.647	2.18002e-220	Mac3	Laptm5
2.16992e-223	0.619956	0.995	0.825	4.04538e-219	Mac3	Zeb2
2.2536e-223	0.525542	0.629	0.231	4.20139e-219	Mac3	Apobec1
6.91909e-222	0.716945	0.805	0.5	1.28993e-217	Mac3	Snx2
2.90429e-217	0.59048	0.981	0.681	5.41446e-213	Mac3	Ucp2
8.5249e-217	0.555011	0.864	0.547	1.5893e-212	Mac3	Ehd4
5.23399e-212	0.526284	0.609	0.225	9.75773e-208	Mac3	Cysltr1
7.16219e-212	0.517805	0.601	0.228	1.33525e-207	Mac3	Tmem106a
4.19191e-209	0.537894	0.989	0.809	7.81497e-205	Mac3	Dazap2
1.31322e-208	0.565224	0.791	0.472	2.44824e-204	Mac3	Mfsd1
5.8074e-208	0.538838	0.948	0.652	1.08267e-203	Mac3	Efhd2
3.11078e-205	0.534828	0.932	0.667	5.79943e-201	Mac3	Ctsa
2.80457e-201	0.50929	0.972	0.587	5.22856e-197	Mac3	Alox5ap
3.08949e-187	0.523961	0.723	0.321	5.75973e-183	Mac3	Plek
2.0719e-186	0.526338	0.991	0.805	3.86264e-182	Mac3	Fn1
4.02674e-185	0.566608	0.599	0.238	7.50706e-181	Mac3	Ccr5
1.34586e-182	0.543222	0.73	0.412	2.50909e-178	Mac3	Nipa2
1.58471e-182	0.511238	0.577	0.244	2.95437e-178	Mac3	Ap1b1
8.24639e-182	0.527223	0.633	0.277	1.53738e-177	Mac3	Rgs10
1.08273e-179	0.51797	0.591	0.235	2.01853e-175	Mac3	Cd300c2
8.5042e-179	0.527323	0.85	0.594	1.58544e-174	Mac3	Snx5
2.42098e-71	0.541138	0.362	0.165	4.51344e-67	Mac3	Ccl7
0	2.14874	1	0.867	0	Mac4	Ctsd
0	1.84193	0.923	0.206	0	Mac4	Pf4
0	1.82863	0.994	0.544	0	Mac4	Plin2
0	1.77059	0.683	0.084	0	Mac4	Gpnmb
0	1.71339	0.878	0.213	0	Mac4	Arg1
0	1.60066	1	0.976	0	Mac4	Ctsb
0	1.54448	0.935	0.271	0	Mac4	Cd68
0	1.54096	0.995	0.774	0	Mac4	Cstb
0	1.48639	1	0.7	0	Mac4	Lgmn
0	1.46971	1	0.996	0	Mac4	Ftl1
0	1.32533	0.774	0.071	0	Mac4	Syngr1
0	1.31503	0.861	0.12	0	Mac4	Ms4a7
0	1.28451	0.941	0.246	0	Mac4	Trem2
0	1.19725	0.9	0.223	0	Mac4	Stab1
0	1.18923	0.929	0.255	0	Mac4	C3ar1
0	1.03425	0.849	0.213	0	Mac4	Msr1
0	0.983064	0.649	0.108	0	Mac4	Fcrls
0	0.949096	0.762	0.176	0	Mac4	Bcl2a1b
0	0.926492	0.699	0.096	0	Mac4	Adam8
0	0.906131	0.815	0.216	0	Mac4	Nceh1
0	0.850976	0.861	0.23	0	Mac4	Adgre1
0	0.771398	0.688	0.133	0	Mac4	Slc27a1
0	0.756499	0.675	0.119	0	Mac4	Fnip2
0	0.750282	0.764	0.178	0	Mac4	Uap1l1
0	0.712417	0.756	0.159	0	Mac4	Slc7a8
0	0.691422	0.694	0.14	0	Mac4	Tmem86a
0	0.678991	0.675	0.091	0	Mac4	Slc37a2
4.32449e-306	0.939693	0.862	0.283	8.06215e-302	Mac4	Cndp2
8.09673e-305	0.869343	0.864	0.261	1.50947e-300	Mac4	Lat2
3.24155e-301	1.10476	0.904	0.336	6.04323e-297	Mac4	Basp1
2.22139e-299	1.18808	1	0.84	4.14133e-295	Mac4	Grn
1.0583e-295	0.746263	0.808	0.204	1.97299e-291	Mac4	Ms4a6d
1.85622e-291	1.23135	0.964	0.564	3.46056e-287	Mac4	Hexb
7.23159e-287	0.817432	0.799	0.245	1.34819e-282	Mac4	Atp6v1c1
6.71572e-281	0.78436	0.824	0.216	1.25201e-276	Mac4	C5ar1
1.14359e-275	1.00313	1	0.879	2.132e-271	Mac4	Sdcbp
8.03139e-274	0.796187	0.866	0.258	1.49729e-269	Mac4	Cd84
2.19646e-269	1.05781	0.994	0.702	4.09485e-265	Mac4	Cotl1
1.11302e-267	0.724634	0.629	0.136	2.075e-263	Mac4	Cd300lf
1.17036e-266	1.2637	0.74	0.196	2.1819e-262	Mac4	Hmox1
1.07515e-265	0.71982	0.75	0.201	2.00439e-261	Mac4	Adssl1
1.1538e-265	0.722572	0.73	0.193	2.15103e-261	Mac4	Cebpa
1.65384e-264	1.15056	0.991	0.59	3.08325e-260	Mac4	Mpeg1
3.91629e-263	0.714883	0.808	0.235	7.30115e-259	Mac4	Tmem106a
1.47022e-262	1.03582	0.994	0.848	2.74093e-258	Mac4	Ctsz
9.56437e-261	0.767161	0.825	0.24	1.78309e-256	Mac4	Cd300c2
2.05165e-260	0.892998	0.81	0.272	3.82488e-256	Mac4	Osbpl8
1.20878e-259	0.78496	0.762	0.23	2.25353e-255	Mac4	Pld3
2.09512e-259	1.03512	0.978	0.486	3.90592e-255	Mac4	Mafb
9.44759e-254	0.838921	0.815	0.273	1.76131e-249	Mac4	Itgb5
3.92901e-252	0.923318	0.983	0.676	7.32484e-248	Mac4	Ctsa
1.31519e-247	0.900668	0.937	0.384	2.45191e-243	Mac4	Cd93
5.17678e-245	1.57721	0.991	0.707	9.65107e-241	Mac4	Spp1
4.99353e-244	0.686815	0.753	0.205	9.30943e-240	Mac4	Lilr4b
2.06324e-237	1.36158	0.998	0.715	3.84649e-233	Mac4	Apoe
6.54842e-235	0.942844	0.909	0.505	1.22082e-230	Mac4	Atp6v1a
1.62176e-230	0.71304	0.832	0.295	3.02345e-226	Mac4	Abhd12
1.47527e-226	0.790438	0.998	0.966	2.75034e-222	Mac4	Lamp1
7.76421e-226	1.95609	0.844	0.425	1.44748e-221	Mac4	Fabp5
7.9707e-220	0.728356	0.799	0.291	1.48598e-215	Mac4	Mdfic
5.81015e-218	0.8702	0.966	0.744	1.08319e-213	Mac4	Aprt
1.05881e-213	0.658185	0.754	0.255	1.97395e-209	Mac4	Rap2b
9.23399e-210	0.998975	1	0.961	1.72149e-205	Mac4	Psap
3.83591e-208	0.765628	0.903	0.48	7.15129e-204	Mac4	Mfsd1
1.16402e-207	0.936215	0.995	0.808	2.17008e-203	Mac4	Lgals3
4.90618e-207	0.670573	0.76	0.247	9.14659e-203	Mac4	Rab7b
1.86394e-204	0.992581	1	0.655	3.47494e-200	Mac4	Ctss
2.10808e-203	0.813269	0.989	0.619	3.93009e-199	Mac4	Sirpa
9.50639e-203	0.716665	0.904	0.45	1.77228e-198	Mac4	Sgpl1
1.22391e-198	0.792895	1	0.999	2.28174e-194	Mac4	Fth1
5.26001e-197	0.750085	0.961	0.773	9.80623e-193	Mac4	Bri3
1.04484e-195	0.878229	1	0.652	1.94789e-191	Mac4	Fcer1g
1.9172e-194	1.67568	0.784	0.336	3.57424e-190	Mac4	Thbs1
3.93954e-194	0.878864	0.992	0.815	7.34448e-190	Mac4	Cyba
2.48876e-192	0.717883	0.918	0.511	4.6398e-188	Mac4	Gusb
9.82756e-190	0.716493	0.988	0.663	1.83215e-185	Mac4	Efhd2
1.98958e-188	0.655596	0.991	0.935	3.70917e-184	Mac4	Akr1a1
4.43483e-183	0.712984	0.961	0.688	8.26785e-179	Mac4	Hexa
4.07008e-181	0.719116	0.711	0.234	7.58785e-177	Mac4	Id2
4.814e-175	0.773798	1	0.648	8.97475e-171	Mac4	Lcp1
1.88124e-171	0.767654	0.997	0.64	3.5072e-167	Mac4	Tyrobp
1.45851e-169	1.03335	0.794	0.337	2.71911e-165	Mac4	C1qc
1.21923e-168	0.721535	0.844	0.332	2.273e-164	Mac4	Plek
6.48177e-168	1.22768	0.838	0.442	1.2084e-163	Mac4	C1qb
5.41239e-165	0.665969	1	0.999	1.00903e-160	Mac4	Tmsb4x
1.12528e-163	0.700833	0.842	0.46	2.09787e-159	Mac4	Soat1
5.83956e-163	0.698209	0.884	0.543	1.08867e-158	Mac4	Cpd
8.71795e-161	0.819981	0.827	0.498	1.62529e-156	Mac4	Rnh1
4.90833e-157	0.823157	0.535	0.145	9.1506e-153	Mac4	Cd36
8.31058e-157	0.672638	0.978	0.735	1.54934e-152	Mac4	Lrp1
1.19407e-151	0.790569	1	0.678	2.2261e-147	Mac4	Lyz2
2.45107e-149	0.684615	0.943	0.69	4.56953e-145	Mac4	Capg
1.08813e-146	0.654925	0.971	0.581	2.0286e-142	Mac4	Cd53
1.2201e-144	0.673401	0.927	0.774	2.27463e-140	Mac4	Pgam1
6.06012e-141	0.812961	0.992	0.846	1.12979e-136	Mac4	Ctsl
2.66947e-140	1.11627	0.541	0.166	4.9767e-136	Mac4	Ccl7
2.49644e-132	0.780334	0.946	0.659	4.65411e-128	Mac4	Srgn
8.19968e-129	0.657701	0.856	0.54	1.52867e-124	Mac4	Msrb1
8.05476e-124	1.04883	0.773	0.408	1.50165e-119	Mac4	C1qa
3.10536e-112	0.886964	0.753	0.392	5.78933e-108	Mac4	Ccl2
0	1.78386	0.987	0.143	0	Mac5	Mki67
0	1.57211	0.883	0.101	0	Mac5	Ube2c
0	1.52752	0.95	0.127	0	Mac5	Pclaf
0	1.48869	0.979	0.119	0	Mac5	Birc5
0	1.19963	0.841	0.061	0	Mac5	Nusap1
0	1.15444	0.866	0.086	0	Mac5	Cenpe
0	1.15206	0.912	0.066	0	Mac5	Kif11
0	1.13219	0.925	0.101	0	Mac5	Cdca3
0	1.11584	0.929	0.087	0	Mac5	Ccna2
0	1.02842	0.887	0.092	0	Mac5	Cdca8
0	0.956959	0.854	0.086	0	Mac5	Incenp
0	0.950114	0.808	0.08	0	Mac5	Kif23
0	0.884799	0.833	0.069	0	Mac5	Kif15
0	0.853619	0.782	0.07	0	Mac5	Bub1b
0	0.837539	0.699	0.064	0	Mac5	Ccnb1
0	0.832029	0.799	0.066	0	Mac5	Knl1
0	0.79164	0.741	0.068	0	Mac5	Kif20b
0	0.777945	0.728	0.06	0	Mac5	Aurkb
0	0.765273	0.736	0.059	0	Mac5	Spc25
0	0.70157	0.682	0.056	0	Mac5	Asf1b
0	0.699953	0.745	0.071	0	Mac5	Ckap2l
0	0.685048	0.707	0.057	0	Mac5	Bub1
1.10685e-305	1.02188	0.895	0.109	2.0635e-301	Mac5	Tpx2
8.05169e-305	1.88799	0.933	0.14	1.50108e-300	Mac5	Top2a
8.01709e-304	1.12734	0.95	0.133	1.49463e-299	Mac5	Racgap1
6.82726e-301	1.28767	0.833	0.096	1.27281e-296	Mac5	Cenpf
5.38354e-295	0.887479	0.762	0.078	1.00365e-290	Mac5	Hmmr
5.9329e-289	0.998326	0.833	0.098	1.10607e-284	Mac5	Prc1
1.0853e-283	0.74152	0.649	0.058	2.02332e-279	Mac5	Aspm
9.71791e-283	0.820987	0.803	0.096	1.81171e-278	Mac5	Tacc3
4.96253e-258	0.853749	0.757	0.091	9.25165e-254	Mac5	Cdk1
5.95919e-250	1.2461	0.967	0.183	1.11097e-245	Mac5	Smc2
1.45654e-243	1.32275	0.469	0.036	2.71542e-239	Mac5	Hist1h1b
9.66735e-241	0.926147	0.762	0.099	1.80228e-236	Mac5	Ccnb2
1.1123e-238	0.96432	0.816	0.121	2.07366e-234	Mac5	H2afx
1.18051e-226	0.747623	0.364	0.023	2.20083e-222	Mac5	Hist1h3c
4.99891e-226	0.735253	0.502	0.045	9.31947e-222	Mac5	Hist1h4d
9.0452e-225	0.731018	0.799	0.119	1.6863e-220	Mac5	Arhgap11a
7.91207e-218	0.710074	0.678	0.085	1.47505e-213	Mac5	Knstrn
7.22653e-215	1.13575	0.95	0.208	1.34724e-210	Mac5	Lmnb1
4.36631e-214	1.59861	1	0.258	8.14012e-210	Mac5	Stmn1
9.73838e-213	0.688391	0.657	0.082	1.81553e-208	Mac5	Tk1
2.77784e-201	0.963816	0.603	0.074	5.17873e-197	Mac5	Rrm2
1.4878e-197	0.906831	0.874	0.171	2.77371e-193	Mac5	Ezh2
1.47621e-192	0.915084	0.406	0.034	2.7521e-188	Mac5	Hist1h2ae
3.32861e-191	1.13803	0.854	0.168	6.20553e-187	Mac5	Cenpa
2.40515e-184	1.0588	0.895	0.203	4.48391e-180	Mac5	Rrm1
1.45653e-183	1.36876	0.979	0.292	2.7154e-179	Mac5	Smc4
1.91263e-180	0.957209	0.912	0.208	3.56571e-176	Mac5	Cks1b
2.24793e-169	0.836797	0.736	0.128	4.19082e-165	Mac5	Cks2
4.64341e-152	1.81786	1	0.625	8.6567e-148	Mac5	Hmgb2
1.41831e-143	0.737789	0.879	0.222	2.64415e-139	Mac5	Rangap1
9.18686e-134	1.089	0.644	0.122	1.71271e-129	Mac5	Fcrls
1.70875e-131	1.10292	0.971	0.444	3.18562e-127	Mac5	Tmpo
3.87365e-129	0.864638	0.921	0.288	7.22164e-125	Mac5	Hmgn2
3.0991e-128	1.29269	1	0.897	5.77765e-124	Mac5	Tuba1b
7.0543e-127	1.23505	1	0.902	1.31513e-122	Mac5	H2afz
1.68811e-123	1.00887	0.996	0.764	3.14715e-119	Mac5	Nucks1
8.71147e-118	0.883292	0.686	0.161	1.62408e-113	Mac5	Atad2
2.51205e-117	0.947412	0.996	0.875	4.68322e-113	Mac5	Anp32b
3.46592e-114	0.852881	1	0.994	6.46151e-110	Mac5	Ptma
5.00493e-113	1.03796	1	0.938	9.33069e-109	Mac5	Tubb5
6.48591e-112	0.927108	0.967	0.538	1.20917e-107	Mac5	Anp32e
4.18103e-110	1.04531	0.929	0.402	7.7947e-106	Mac5	Tuba1c
1.39217e-97	0.892027	0.933	0.467	2.59541e-93	Mac5	Rad21
3.55232e-97	0.697088	0.615	0.144	6.6226e-93	Mac5	Lig1
6.65466e-97	0.700877	0.695	0.185	1.24063e-92	Mac5	Dck
1.60405e-96	0.778195	1	0.964	2.99042e-92	Mac5	Hmgb1
2.45482e-95	1.01864	0.983	0.739	4.57652e-91	Mac5	Arl6ip1
2.98214e-95	0.849378	0.967	0.568	5.55961e-91	Mac5	H2afv
3.01727e-93	0.839371	0.435	0.078	5.6251e-89	Mac5	Hist1h1e
1.46175e-83	0.817978	0.937	0.418	2.72514e-79	Mac5	Cfp
7.57284e-79	0.791598	0.845	0.29	1.4118e-74	Mac5	Cd68
4.37242e-78	0.79903	0.992	0.709	8.15151e-74	Mac5	Cotl1
5.88812e-78	0.704396	0.925	0.546	1.09772e-73	Mac5	Ube2s
8.72931e-78	0.852521	0.95	0.723	1.62741e-73	Mac5	Dek
2.66533e-74	0.705209	0.971	0.703	4.96898e-70	Mac5	Jpt1
3.32448e-74	1.05862	0.862	0.377	6.19784e-70	Mac5	Mrc1
4.08154e-73	0.794656	1	0.657	7.60922e-69	Mac5	Lcp1
3.36703e-70	1.23597	0.858	0.451	6.27716e-66	Mac5	C1qb
2.56036e-69	1.19031	0.782	0.349	4.77328e-65	Mac5	C1qc
1.21082e-68	0.725468	0.64	0.193	2.25733e-64	Mac5	Bcl2a1b
2.72161e-68	0.699272	1	0.999	5.0739e-64	Mac5	Tmsb4x
3.91694e-66	1.15767	0.665	0.228	7.30234e-62	Mac5	Pf4
7.12415e-62	0.760478	0.983	0.685	1.32815e-57	Mac5	Ctsc
5.44083e-60	0.815093	0.715	0.268	1.01433e-55	Mac5	Trem2
9.00357e-59	0.723366	0.992	0.661	1.67854e-54	Mac5	Fcer1g
1.37366e-52	1.1221	0.77	0.417	2.56092e-48	Mac5	C1qa
2.28745e-52	0.869968	0.623	0.229	4.26449e-48	Mac5	Cx3cr1
5.20261e-52	0.768446	0.879	0.569	9.69923e-48	Mac5	Dab2
1.27195e-51	0.874016	0.636	0.244	2.37129e-47	Mac5	Stab1
5.6226e-41	0.844242	0.644	0.315	1.04822e-36	Mac5	Pcna
1.14931e-34	0.805238	0.891	0.71	2.14267e-30	Mac5	Lgmn
4.12117e-26	0.994935	0.506	0.236	7.68309e-22	Mac5	Arg1
5.38937e-26	0.723432	0.787	0.559	1.00474e-21	Mac5	Plin2
2.32625e-15	0.936576	0.669	0.55	4.33684e-11	Mac5	Cd74
8.37525e-14	0.809032	0.879	0.872	1.5614e-09	Mac5	Ctsd
1.51738e-11	0.952832	0.502	0.374	2.82885e-07	Mac5	H2-Eb1
8.45474e-11	0.917258	0.556	0.447	1.57622e-06	Mac5	H2-Aa
1.3168e-09	0.903843	0.54	0.448	2.45492e-05	Mac5	H2-Ab1
0	2.52333	0.971	0.341	0	MoDC	H2-Eb1
0	2.51917	0.992	0.527	0	MoDC	Cd74
0	2.4486	0.976	0.418	0	MoDC	H2-Ab1
0	2.41929	0.976	0.418	0	MoDC	H2-Aa
0	1.80097	0.608	0.09	0	MoDC	Ifitm1
0	1.73716	0.676	0.017	0	MoDC	Cd209a
0	1.63684	0.786	0.03	0	MoDC	Klrd1
0	1.60399	0.897	0.129	0	MoDC	Napsa
0	1.50023	0.932	0.214	0	MoDC	H2-DMa
0	1.37773	0.971	0.616	0	MoDC	Gm2a
0	1.37535	0.918	0.236	0	MoDC	Plbd1
0	1.37411	0.911	0.172	0	MoDC	H2-DMb1
0	1.23688	0.627	0.086	0	MoDC	Clec10a
0	1.18358	0.99	0.665	0	MoDC	Lsp1
0	1.15895	0.8	0.072	0	MoDC	Ciita
0	1.15858	0.796	0.115	0	MoDC	Itgb7
0	1.11878	0.992	0.599	0	MoDC	Ptprc
0	1.0967	0.9	0.33	0	MoDC	Syngr2
0	1.03046	0.815	0.19	0	MoDC	Cbfa2t3
0	1.02111	0.992	0.604	0	MoDC	Coro1a
0	0.973063	0.702	0.028	0	MoDC	Flt3
0	0.95478	0.596	0.126	0	MoDC	Krt80
0	0.939475	0.423	0.008	0	MoDC	Cd7
0	0.910655	0.554	0.031	0	MoDC	Bcl11a
0	0.909562	0.54	0.014	0	MoDC	H2-Oa
0	0.904243	0.648	0.102	0	MoDC	Slamf9
0	0.90219	0.703	0.167	0	MoDC	Ifitm6
0	0.891391	0.972	0.785	0	MoDC	H2afy
0	0.890647	0.799	0.27	0	MoDC	Olfm1
0	0.870757	0.882	0.309	0	MoDC	Pip4k2a
0	0.863336	0.878	0.322	0	MoDC	Rac2
0	0.856781	0.617	0.048	0	MoDC	Itgax
0	0.842953	0.727	0.071	0	MoDC	Dpp4
0	0.832046	0.634	0.035	0	MoDC	Kmo
0	0.826688	0.457	0.026	0	MoDC	H2-DMb2
0	0.823096	0.735	0.128	0	MoDC	Cytip
0	0.802994	0.675	0.107	0	MoDC	Ddr1
0	0.792655	0.664	0.062	0	MoDC	Grk3
0	0.764144	0.621	0.088	0	MoDC	Rnase6
0	0.757833	0.732	0.141	0	MoDC	Tspan13
0	0.712163	0.678	0.173	0	MoDC	Itpr1
0	0.702505	0.72	0.188	0	MoDC	Fgr
0	0.659557	0.662	0.138	0	MoDC	Sema4d
0	0.625359	0.635	0.126	0	MoDC	Coro2a
0	0.611136	0.56	0.05	0	MoDC	Cd244
0	0.595459	0.363	0.037	0	MoDC	Cd72
1.19232e-306	0.737121	0.749	0.222	2.22285e-302	MoDC	Alcam
2.25216e-302	0.798063	0.824	0.295	4.1987e-298	MoDC	Dock10
3.39409e-299	0.799702	0.799	0.28	6.32761e-295	MoDC	H2-T23
1.23669e-293	1.07096	0.973	0.776	2.30556e-289	MoDC	Fxyd5
9.96694e-289	0.734595	0.693	0.199	1.85814e-284	MoDC	Cd300a
2.87037e-288	0.650797	1	1	5.35123e-284	MoDC	Fau
5.23139e-287	0.639367	0.489	0.093	9.75288e-283	MoDC	Ms4a4c
1.47382e-282	0.902729	0.995	0.656	2.74765e-278	MoDC	Laptm5
9.08015e-282	1.1137	0.967	0.601	1.69281e-277	MoDC	Cd52
1.40786e-279	0.758486	0.69	0.196	2.62468e-275	MoDC	Pou2f2
9.89423e-279	0.818062	1	0.961	1.84458e-274	MoDC	Cst3
1.09645e-278	0.78257	0.808	0.315	2.04411e-274	MoDC	Psmb8
3.16061e-273	0.730672	0.799	0.273	5.89233e-269	MoDC	Selplg
9.16294e-270	0.791818	0.97	0.685	1.70825e-265	MoDC	Ctsh
3.51611e-264	0.691724	0.894	0.339	6.55509e-260	MoDC	Arhgap30
1.38945e-259	0.783985	0.874	0.377	2.59035e-255	MoDC	Cyth4
1.47227e-247	0.617447	0.684	0.22	2.74476e-243	MoDC	Limd2
1.4472e-246	0.672232	0.842	0.313	2.69801e-242	MoDC	Spi1
4.58441e-242	0.595722	0.738	0.242	8.54672e-238	MoDC	Cd48
9.68462e-242	0.659877	0.812	0.302	1.8055e-237	MoDC	Ptpn6
2.5693e-239	0.642901	0.795	0.313	4.78994e-235	MoDC	Ikbkb
6.36085e-237	0.592788	0.691	0.219	1.18585e-232	MoDC	Arhgap15
1.33667e-236	0.614158	1	0.99	2.49196e-232	MoDC	H3f3a
3.69371e-234	0.831155	0.991	0.635	6.88619e-230	MoDC	Tyrobp
8.66193e-226	0.644617	0.361	0.062	1.61484e-221	MoDC	Sell
8.06474e-224	0.852532	0.905	0.525	1.50351e-219	MoDC	Wfdc17
6.59066e-222	0.698454	1	0.843	1.2287e-217	MoDC	H2-D1
1.79892e-219	0.690391	1	0.911	3.35373e-215	MoDC	Sh3bgrl3
5.26348e-219	0.61355	0.775	0.294	9.8127e-215	MoDC	Hcls1
4.45797e-215	0.888857	0.874	0.57	8.311e-211	MoDC	Ckb
1.94198e-208	0.684646	0.812	0.326	3.62043e-204	MoDC	Pld4
9.73919e-203	0.848321	0.83	0.402	1.81568e-198	MoDC	Cfp
4.28419e-200	0.757843	0.828	0.475	7.98702e-196	MoDC	Nfkb1
3.51993e-199	0.854462	0.882	0.607	6.5622e-195	MoDC	Tmem176b
1.18164e-198	0.988453	0.842	0.535	2.20294e-194	MoDC	Tmem176a
1.97481e-194	0.69031	0.853	0.488	3.68164e-190	MoDC	Man2b1
5.33233e-194	0.632003	0.806	0.329	9.94106e-190	MoDC	Itgb2
1.16819e-193	0.642406	0.998	0.793	2.17786e-189	MoDC	H2-K1
2.58721e-192	0.667301	0.869	0.427	4.82333e-188	MoDC	Ms4a6c
9.00873e-189	0.716693	0.994	0.647	1.6795e-184	MoDC	Fcer1g
2.45584e-177	0.702335	0.98	0.922	4.57843e-173	MoDC	Atox1
3.08399e-173	0.697614	0.844	0.567	5.74948e-169	MoDC	Cd2ap
5.19794e-173	0.602112	0.974	0.691	9.69052e-169	MoDC	Arhgdib
6.75989e-173	0.656893	0.997	0.65	1.26025e-168	MoDC	Ctss
7.61101e-173	0.611321	0.826	0.461	1.41892e-168	MoDC	Cnn2
2.43727e-166	0.609108	1	0.999	4.54381e-162	MoDC	Tmsb4x
7.234e-165	0.695018	0.725	0.31	1.34863e-160	MoDC	Smpdl3a
1.71279e-158	0.624885	0.714	0.309	3.19315e-154	MoDC	Fam46a
6.28431e-158	0.624829	0.777	0.39	1.17158e-153	MoDC	Emb
9.18187e-157	0.615796	0.691	0.286	1.71178e-152	MoDC	Ccnd2
2.94867e-129	0.849431	0.626	0.282	5.4972e-125	MoDC	Plac8
1.2022e-126	0.712299	0.873	0.755	2.24125e-122	MoDC	Mdh2
4.90013e-108	0.603379	0.977	0.932	9.13532e-104	MoDC	Ifitm3
8.66065e-90	0.604727	0.643	0.345	1.6146e-85	MoDC	Tmem123
0	1.94082	0.977	0.135	0	cDC	Wdfy4
0	1.70904	0.954	0.055	0	cDC	Ifi205
0	1.50333	0.87	0.026	0	cDC	Sept3
0	1.31766	0.949	0.053	0	cDC	Flt3
0	1.27755	0.852	0.006	0	cDC	Clec9a
0	1.26115	0.921	0.106	0	cDC	Rnase6
0	1.17393	0.796	0.05	0	cDC	Tlr3
0	1.16144	0.917	0.096	0	cDC	Dpp4
0	1.10789	0.852	0.018	0	cDC	Btla
0	1.06813	0.917	0.117	0	cDC	Sept6
0	1.03333	0.681	0.001	0	cDC	Xcr1
0	1.02103	0.866	0.076	0	cDC	Nup210
0	1.01911	0.87	0.046	0	cDC	Jaml
0	1.01784	0.565	0.003	0	cDC	Itgae
0	0.883137	0.736	0.03	0	cDC	H2-Ob
0	0.763876	0.75	0.056	0	cDC	Cyfip2
0	0.736608	0.741	0.034	0	cDC	Ap1s3
0	0.724499	0.597	0.01	0	cDC	Mycl
2.78051e-299	1.01894	0.889	0.101	5.18371e-295	cDC	Ciita
2.88321e-285	1.57273	0.954	0.14	5.37517e-281	cDC	Cd24a
6.25184e-270	1.24647	0.954	0.141	1.16553e-265	cDC	Itgb7
1.87247e-242	1.00656	0.917	0.147	3.49085e-238	cDC	Fgd2
3.36243e-233	1.40821	0.963	0.2	6.26858e-229	cDC	Naga
2.65993e-229	0.943275	0.852	0.135	4.95891e-225	cDC	Ppm1m
3.98139e-229	1.41594	0.963	0.203	7.42251e-225	cDC	Psmb9
5.53349e-224	0.899717	0.819	0.119	1.03161e-219	cDC	Batf3
3.00327e-222	1.17436	0.944	0.161	5.599e-218	cDC	Napsa
2.07767e-215	0.941438	0.801	0.119	3.87339e-211	cDC	Phf11b
6.40727e-215	1.39578	0.991	0.202	1.19451e-210	cDC	H2-DMb1
2.22169e-213	0.921241	0.866	0.141	4.1419e-209	cDC	Unc119
1.43323e-211	1.88428	1	0.264	2.67197e-207	cDC	Plbd1
6.17795e-210	1.11176	0.935	0.191	1.15175e-205	cDC	Tap1
5.47248e-202	1.14239	0.889	0.176	1.02023e-197	cDC	BC028528
1.32982e-201	0.81789	0.847	0.144	2.47918e-197	cDC	Pak1
2.95265e-196	0.893411	0.889	0.152	5.50463e-192	cDC	Cytip
2.86006e-190	1.72284	0.963	0.243	5.33201e-186	cDC	Id2
4.85338e-189	2.34507	0.986	0.311	9.04816e-185	cDC	Naaa
5.98124e-183	1.44965	0.995	0.312	1.11508e-178	cDC	Fnbp1
2.19804e-180	1.1393	0.954	0.214	4.09781e-176	cDC	Cbfa2t3
4.62417e-177	0.751507	0.806	0.143	8.62084e-173	cDC	Bri3bp
9.51442e-176	1.33045	0.972	0.244	1.77377e-171	cDC	H2-DMa
8.81204e-175	1.66668	0.986	0.334	1.64283e-170	cDC	Psmb8
9.10104e-172	2.33741	0.921	0.27	1.69671e-167	cDC	Irf8
2.66225e-168	1.1829	0.917	0.22	4.96323e-164	cDC	Fgl2
7.01846e-163	0.793062	0.755	0.137	1.30845e-158	cDC	Sdad1
2.33174e-158	1.2484	0.977	0.315	4.34707e-154	cDC	Dock10
1.3237e-152	2.01632	1	0.367	2.46777e-148	cDC	H2-Eb1
1.31957e-147	2.18798	1	0.442	2.46008e-143	cDC	H2-Ab1
2.32129e-146	0.810764	0.755	0.145	4.32759e-142	cDC	Ifi211
1.05331e-143	0.838916	0.81	0.177	1.96369e-139	cDC	St3gal5
2.78667e-141	0.814457	0.856	0.209	5.19519e-137	cDC	Srebf2
4.78848e-140	1.997	1	0.441	8.92716e-136	cDC	H2-Aa
2.44706e-139	2.55118	1	0.962	4.56205e-135	cDC	Cst3
1.85697e-138	0.80551	0.829	0.201	3.46194e-134	cDC	Tap2
5.16492e-137	0.809824	0.829	0.193	9.62895e-133	cDC	Itpr1
7.75477e-136	1.59465	0.907	0.328	1.44572e-131	cDC	Ppt1
3.24277e-128	2.00785	1	0.546	6.04549e-124	cDC	Cd74
3.7318e-127	1.65412	0.995	0.631	6.9572e-123	cDC	Gm2a
5.9297e-123	1.19732	0.981	0.677	1.10547e-118	cDC	Psme1
9.92062e-122	0.875334	0.889	0.258	1.8495e-117	cDC	Shtn1
5.80205e-120	0.89145	0.94	0.293	1.08168e-115	cDC	Selplg
2.85276e-118	1.40823	0.986	0.581	5.31839e-114	cDC	Ckb
1.80263e-114	0.774936	0.912	0.26	3.36065e-110	cDC	Cd48
2.21705e-114	1.32232	0.995	0.679	4.13325e-110	cDC	Lsp1
2.96404e-114	0.935905	0.944	0.353	5.52586e-110	cDC	Syngr2
8.34415e-114	1.01951	1	0.501	1.5556e-109	cDC	Man2b1
1.8164e-112	0.85033	0.917	0.29	3.38631e-108	cDC	Olfm1
3.28636e-109	0.832078	0.944	0.312	6.12676e-105	cDC	Hcls1
6.22444e-109	0.759896	0.824	0.228	1.16042e-104	cDC	Camk1d
1.64087e-108	1.08427	0.792	0.23	3.05908e-104	cDC	Cldnd1
6.62309e-107	1.38599	1	0.616	1.23474e-102	cDC	Cd52
7.9477e-107	0.954709	0.995	0.792	1.48169e-102	cDC	H2afy
7.28903e-104	1.22402	0.991	0.6	1.35889e-99	cDC	Mpeg1
7.70206e-103	0.785427	0.898	0.326	1.4359e-98	cDC	Dbnl
5.76231e-101	0.780285	0.907	0.3	1.07427e-96	cDC	H2-T23
1.22876e-100	1.17978	1	0.974	2.29077e-96	cDC	Tmsb10
1.63186e-98	0.831815	0.81	0.244	3.04228e-94	cDC	Pfkp
1.93004e-97	1.06579	0.991	0.62	3.59818e-93	cDC	Coro1a
2.33228e-97	1.07954	1	0.999	4.34807e-93	cDC	Tmsb4x
7.13313e-97	0.781484	1	0.999	1.32983e-92	cDC	Rps11
1.11895e-88	0.870642	0.986	0.76	2.08606e-84	cDC	Taldo1
4.71749e-88	0.773908	0.843	0.322	8.79482e-84	cDC	Commd8
8.57881e-88	0.817906	0.843	0.302	1.59935e-83	cDC	Baz1a
1.47831e-84	0.772734	0.88	0.333	2.75601e-80	cDC	Pip4k2a
1.21193e-83	0.826327	0.94	0.474	2.2594e-79	cDC	Cnn2
1.78773e-83	0.843799	1	0.863	3.33287e-79	cDC	Actr3
8.99268e-82	0.773442	0.991	0.846	1.67651e-77	cDC	Sub1
3.93998e-79	0.75493	0.944	0.501	7.34531e-75	cDC	Skap2
1.19281e-77	0.862343	1	0.962	2.22375e-73	cDC	Psap
1.30005e-77	0.91127	0.833	0.293	2.42368e-73	cDC	Plac8
3.24202e-76	0.734776	1	1	6.0441e-72	cDC	Actb
6.75647e-73	0.758875	0.912	0.522	1.25961e-68	cDC	Anxa6
1.30018e-70	0.777737	0.958	0.528	2.42393e-66	cDC	Ptpn18
1.45237e-69	0.819228	0.991	0.701	2.70764e-65	cDC	Ucp2
7.48126e-69	0.849287	0.977	0.924	1.39473e-64	cDC	Atox1
2.58399e-68	0.847774	1	0.931	4.81733e-64	cDC	Crip1
2.84942e-68	0.773108	0.935	0.578	5.31218e-64	cDC	Cd2ap
9.25888e-66	0.754857	1	0.615	1.72613e-61	cDC	Ptprc
5.25298e-47	0.760296	0.995	0.902	9.79312e-43	cDC	H2afz
9.57102e-19	1.00611	0.306	0.116	1.78433e-14	cDC	Ifitm1
0	3.95802	0.838	0.019	0	GC	S100a8
0	3.9289	0.812	0.007	0	GC	S100a9
0	2.73095	0.882	0.096	0	GC	Mmp9
0	2.28274	0.78	0.059	0	GC	Il1b
0	2.17384	0.557	0.023	0	GC	Cxcl2
0	2.133	0.876	0.099	0	GC	Csf3r
0	1.86102	0.366	0.002	0	GC	Retnlg
0	1.81658	0.685	0.002	0	GC	Cxcr2
0	1.70334	0.439	0.03	0	GC	Slpi
0	1.30872	0.325	0.014	0	GC	Ptgs2
0	1.20298	0.484	0.035	0	GC	Il1r2
0	1.08006	0.452	0.034	0	GC	Pglyrp1
0	0.974885	0.379	0.006	0	GC	Hdc
0	0.879592	0.341	0.007	0	GC	Siglecf
0	0.849819	0.325	0.005	0	GC	H2-Q10
0	0.755573	0.255	0	0	GC	Il1f9
0	0.716644	0.306	0.009	0	GC	Slc40a1
7.17352e-290	0.788497	0.334	0.018	1.33736e-285	GC	Trem1
9.77716e-257	1.12225	0.497	0.053	1.82276e-252	GC	Mxd1
6.99206e-215	0.718879	0.293	0.019	1.30353e-210	GC	Ltb
2.87734e-213	1.78655	0.65	0.108	5.36423e-209	GC	Ifitm1
1.16048e-209	0.754004	0.354	0.031	2.16348e-205	GC	Trim30b
3.07082e-199	1.26774	0.694	0.145	5.72493e-195	GC	Cd300lf
6.85098e-198	1.27022	0.389	0.04	1.27723e-193	GC	Slfn4
1.87525e-194	1.31861	0.745	0.178	3.49602e-190	GC	Sorl1
2.5675e-189	1.24746	0.5	0.07	4.78659e-185	GC	Sell
5.11169e-177	1.23856	0.678	0.141	9.52972e-173	GC	Cd24a
2.2093e-175	0.737796	0.318	0.029	4.1188e-171	GC	Fpr2
5.30187e-175	1.58027	0.838	0.293	9.88427e-171	GC	Gsr
7.04705e-163	1.11818	0.455	0.068	1.31378e-158	GC	Clec4e
1.04915e-160	1.54563	1	0.647	1.95593e-156	GC	Tyrobp
4.17228e-159	0.727933	0.373	0.046	7.77838e-155	GC	2310001H17Rik
2.32865e-154	1.33165	0.726	0.213	4.34129e-150	GC	Btg2
1.12249e-153	0.840332	0.43	0.063	2.09266e-149	GC	Slfn1
1.7347e-145	1.17043	0.5	0.092	3.234e-141	GC	Clec4d
9.83044e-144	1.57059	0.768	0.279	1.83269e-139	GC	Pim1
7.9579e-134	1.42356	0.93	0.545	1.48359e-129	GC	Msrb1
1.12109e-133	1.02152	0.452	0.082	2.09005e-129	GC	Cxcr4
3.71516e-131	0.966529	0.455	0.079	6.92617e-127	GC	AA467197
4.72706e-129	1.50422	1	0.77	8.81266e-125	GC	Neat1
1.09862e-128	1.54883	0.984	0.664	2.04816e-124	GC	Srgn
2.09226e-127	1.40736	0.984	0.614	3.90059e-123	GC	Cd52
1.64241e-125	1.22305	0.981	0.644	3.06195e-121	GC	Btg1
2.15134e-122	1.20622	0.981	0.613	4.01074e-118	GC	Ptprc
1.52961e-120	1.21848	0.822	0.343	2.85164e-116	GC	Rac2
3.13994e-119	1.11152	1	0.823	5.85379e-115	GC	Mcl1
2.35913e-118	1.05085	0.338	0.05	4.39812e-114	GC	G0s2
5.13755e-118	1.17442	0.713	0.245	9.57793e-114	GC	Lst1
7.5658e-116	1.11746	1	0.783	1.41049e-111	GC	Fxyd5
6.18855e-114	1.09571	0.723	0.267	1.15373e-109	GC	Nfam1
1.13859e-113	1.23071	0.806	0.349	2.12267e-109	GC	Ncf1
5.47956e-107	1.53163	0.306	0.045	1.02155e-102	GC	Ccl3
7.83442e-107	1.26295	0.755	0.325	1.46057e-102	GC	Zfp36
7.73411e-106	0.908337	0.274	0.036	1.44187e-101	GC	Ccrl2
6.96342e-100	0.947557	0.322	0.051	1.29819e-95	GC	Il1rn
7.17072e-93	0.735	1	0.995	1.33684e-88	GC	Malat1
1.45456e-91	1.10417	1	0.914	2.71173e-87	GC	S100a11
2.01131e-85	0.990261	0.589	0.222	3.74968e-81	GC	Lyst
9.30554e-85	0.728144	0.318	0.059	1.73483e-80	GC	Pmaip1
9.72961e-85	0.962441	0.939	0.638	1.81389e-80	GC	Txnip
3.25742e-80	0.694544	0.325	0.065	6.0728e-76	GC	Mcemp1
3.31345e-79	1.18829	0.662	0.328	6.17727e-75	GC	Grina
5.36876e-78	0.77233	0.994	0.777	1.0009e-73	GC	Ostf1
1.336e-75	0.913766	0.643	0.255	2.49071e-71	GC	Ccr1
6.13965e-74	0.976997	0.818	0.535	1.14462e-69	GC	Junb
3.62413e-73	0.923432	0.917	0.572	6.75647e-69	GC	Cebpb
1.52384e-69	0.682426	1	0.991	2.84089e-65	GC	H3f3b
9.015e-69	0.819104	0.551	0.211	1.68067e-64	GC	Fgr
7.06857e-68	0.82394	0.465	0.152	1.31779e-63	GC	Tnfaip2
5.0617e-66	0.730383	0.994	0.656	9.43653e-62	GC	Lcp1
1.34869e-65	0.722374	0.965	0.589	2.51435e-61	GC	Cd53
5.54925e-65	0.819584	0.828	0.599	1.03455e-60	GC	Adipor1
7.97355e-64	0.768624	0.522	0.206	1.48651e-59	GC	Retreg1
8.62951e-64	1.11515	0.404	0.119	1.6088e-59	GC	Hp
1.1738e-63	1.24333	0.627	0.336	2.18832e-59	GC	2810474O19Rik
5.28748e-63	0.825349	0.844	0.574	9.85745e-59	GC	Tpd52
4.98225e-61	0.867546	0.417	0.131	9.2884e-57	GC	Fosb
5.93013e-61	0.908776	0.618	0.292	1.10555e-56	GC	Rgs2
6.59714e-61	0.834096	0.65	0.322	1.22991e-56	GC	Gmfg
3.81612e-60	0.792739	0.554	0.225	7.11439e-56	GC	Cd300ld
1.22884e-59	1.20816	0.659	0.385	2.29093e-55	GC	Cdk2ap2
4.97617e-59	0.916588	0.557	0.255	9.27707e-55	GC	Stk17b
2.9176e-56	0.866593	0.436	0.147	5.43928e-52	GC	Egr1
7.58063e-56	0.755358	0.389	0.121	1.41326e-51	GC	Cd33
8.26231e-52	0.789566	0.283	0.07	1.54034e-47	GC	Clec4n
1.802e-51	0.696309	0.758	0.502	3.35948e-47	GC	Skap2
1.50461e-48	0.95315	0.5	0.222	2.80505e-44	GC	Lilr4b
9.66045e-45	0.770498	0.65	0.405	1.801e-40	GC	Apbb1ip
5.0516e-43	0.791456	0.605	0.38	9.4177e-39	GC	Snap23
1.77452e-39	0.811095	0.478	0.224	3.30824e-35	GC	Fgl2
2.30505e-39	0.783195	0.666	0.458	4.2973e-35	GC	Rnf149
4.885e-37	0.956696	0.484	0.243	9.1071e-33	GC	Dusp1
6.9405e-36	0.691345	1	0.999	1.29392e-31	GC	Fth1
5.16889e-34	0.712103	0.688	0.532	9.63635e-30	GC	Vasp
6.4788e-31	0.711346	0.513	0.297	1.20784e-26	GC	Selplg
3.23686e-29	0.738588	0.573	0.348	6.03447e-25	GC	Plek
1.43732e-26	0.695277	0.497	0.29	2.67959e-22	GC	Fos
1.82783e-23	0.712839	0.806	0.541	3.40762e-19	GC	Wfdc17
1.68083e-22	0.691042	0.42	0.233	3.13357e-18	GC	Pla2g7
2.16975e-16	0.746124	0.398	0.263	4.04507e-12	GC	Marcksl1
0	3.16342	0.742	0.01	0	T/NK	Ccl5
0	2.64786	0.554	0.001	0	T/NK	Gzma
0	2.20618	0.852	0.128	0	T/NK	AW112010
0	2.05916	0.738	0.001	0	T/NK	Nkg7
0	1.80845	0.797	0.001	0	T/NK	Il2rb
0	1.76843	0.745	0.018	0	T/NK	Ms4a4b
0	1.68174	0.875	0.064	0	T/NK	H2-Q7
0	1.57983	0.83	0.002	0	T/NK	Gimap3
0	1.34454	0.708	0.039	0	T/NK	Gimap4
0	1.31812	0.723	0.01	0	T/NK	Ptprcap
0	1.29236	0.587	0.049	0	T/NK	Klrk1
0	1.27504	0.797	0.083	0	T/NK	Itgal
0	1.25863	0.594	0.001	0	T/NK	Trbc1
0	1.24212	0.343	0.001	0	T/NK	Gzmb
0	1.23393	0.649	0.004	0	T/NK	Txk
0	1.21386	0.306	0	0	T/NK	Klra4
0	1.20529	0.531	0.001	0	T/NK	Klrb1c
0	1.19962	0.528	0.005	0	T/NK	Klre1
0	1.18002	0.336	0.001	0	T/NK	Klra8
0	1.14978	0.712	0.025	0	T/NK	H2-Q6
0	1.08994	0.483	0.002	0	T/NK	Klrc2
0	1.03479	0.55	0.005	0	T/NK	Il18r1
0	1.03388	0.454	0.001	0	T/NK	Trbc2
0	1.00249	0.428	0	0	T/NK	Prf1
0	0.956566	0.609	0.047	0	T/NK	Gimap6
0	0.955866	0.59	0.001	0	T/NK	Skap1
0	0.951187	0.292	0	0	T/NK	Klra9
0	0.938221	0.535	0.002	0	T/NK	Ctsw
0	0.936651	0.613	0.026	0	T/NK	Sept1
0	0.934557	0.421	0.018	0	T/NK	Ltb
0	0.918143	0.609	0.027	0	T/NK	Gimap8
0	0.841699	0.406	0	0	T/NK	Ncr1
0	0.829722	0.539	0.035	0	T/NK	Gimap5
0	0.766528	0.299	0.001	0	T/NK	Klrc1
0	0.726563	0.421	0.002	0	T/NK	Lck
0	0.697663	0.461	0.001	0	T/NK	Sh2d2a
0	0.696269	0.45	0.014	0	T/NK	Cd2
0	0.674247	0.31	0.011	0	T/NK	Serpinb6b
0	0.627735	0.332	0	0	T/NK	Eomes
0	0.61042	0.277	0.002	0	T/NK	Gata3
0	0.595607	0.369	0	0	T/NK	Gm2682
3.39738e-282	0.585931	0.343	0.017	6.33373e-278	T/NK	Atp1b1
1.33503e-273	0.71153	0.314	0.015	2.48889e-269	T/NK	Klri2
3.20946e-262	0.866738	0.554	0.054	5.98339e-258	T/NK	Il18rap
4.83253e-251	1.24502	0.779	0.129	9.00928e-247	T/NK	Hcst
2.06169e-243	0.597889	0.347	0.021	3.84361e-239	T/NK	Tnfrsf18
1.35003e-242	0.684795	0.483	0.043	2.51686e-238	T/NK	Gimap1
8.42232e-231	1.09666	0.568	0.063	1.57017e-226	T/NK	Klrd1
4.25027e-220	0.748798	0.531	0.059	7.92378e-216	T/NK	Spn
5.40708e-208	0.700209	0.509	0.058	1.00804e-203	T/NK	Cyfip2
1.72608e-195	1.03579	0.55	0.071	3.21793e-191	T/NK	Sell
9.06451e-194	0.920088	0.649	0.094	1.6899e-189	T/NK	Ctla2a
2.26132e-180	0.803096	0.48	0.06	4.21578e-176	T/NK	Satb1
5.52684e-167	0.604623	0.417	0.047	1.03037e-162	T/NK	Stat4
2.27588e-147	1.2204	0.701	0.176	4.24292e-143	T/NK	Bcl2
5.02503e-146	0.611067	0.509	0.079	9.36816e-142	T/NK	Nup210
5.32857e-141	1.05885	0.742	0.191	9.93405e-137	T/NK	Ets1
6.85902e-138	1.26488	1	0.801	1.27873e-133	T/NK	H2-K1
4.31373e-130	0.673005	0.443	0.069	8.04208e-126	T/NK	Osbpl3
7.00574e-130	0.983833	0.871	0.292	1.30608e-125	T/NK	Selplg
2.63424e-129	0.749544	0.649	0.142	4.911e-125	T/NK	Ablim1
2.41419e-127	1.40874	0.985	0.614	4.50078e-123	T/NK	Ptprc
1.47065e-122	0.600052	0.446	0.073	2.74173e-118	T/NK	Rinl
3.75293e-121	0.60583	0.439	0.071	6.99659e-117	T/NK	Ptpn22
4.56846e-121	0.711893	0.417	0.064	8.51698e-117	T/NK	Serpinb9
3.59227e-111	0.744493	0.557	0.126	6.69706e-107	T/NK	Cd82
2.37314e-110	0.843624	0.306	0.038	4.42424e-106	T/NK	Il7r
3.18903e-109	1.12224	0.686	0.22	5.94531e-105	T/NK	Ugcg
9.96544e-109	0.582715	0.439	0.076	1.85786e-104	T/NK	Ccdc88c
1.89633e-106	0.972743	0.871	0.343	3.53533e-102	T/NK	Rac2
2.32786e-101	0.708084	0.568	0.142	4.33983e-97	T/NK	Il2rg
2.9897e-100	0.757689	1	0.999	5.57369e-96	T/NK	Rps27
2.76981e-98	0.606162	0.524	0.121	5.16375e-94	T/NK	Sept6
1.33405e-92	0.594457	0.469	0.101	2.48707e-88	T/NK	Runx3
4.28952e-92	0.628305	0.491	0.115	7.99695e-88	T/NK	Tecpr1
2.04672e-89	0.848282	1	0.849	3.8157e-85	T/NK	H2-D1
3.80551e-87	0.955925	0.934	0.702	7.09462e-83	T/NK	Shisa5
3.34308e-85	0.622643	1	1	6.2325e-81	T/NK	Rps24
1.9173e-82	0.727069	1	0.945	3.57441e-78	T/NK	B2m
5.56609e-77	0.735788	0.996	0.902	1.03769e-72	T/NK	Mbnl1
8.2681e-77	0.688659	1	0.973	1.54142e-72	T/NK	Tmsb10
1.24949e-76	0.841253	0.989	0.615	2.32942e-72	T/NK	Cd52
5.77735e-74	0.786991	0.679	0.246	1.07707e-69	T/NK	Id2
1.40446e-72	0.611241	0.531	0.146	2.61833e-68	T/NK	Itgb7
3.87081e-69	0.740858	0.649	0.264	7.21635e-65	T/NK	Pdcd4
1.02363e-64	0.775705	0.716	0.302	1.90836e-60	T/NK	Ccnd2
1.47594e-63	0.730248	0.934	0.781	2.7516e-59	T/NK	Jak1
2.37733e-60	0.696156	0.745	0.335	4.43205e-56	T/NK	Dock2
5.30177e-57	0.644004	0.605	0.246	9.88408e-53	T/NK	Ankrd44
1.36747e-54	0.642341	0.472	0.161	2.54938e-50	T/NK	Arsb
7.81591e-51	0.580231	0.565	0.225	1.45712e-46	T/NK	Apobec3
5.44041e-48	0.623611	0.904	0.737	1.01426e-43	T/NK	Macf1
2.56566e-46	0.580548	0.59	0.256	4.78317e-42	T/NK	Ikzf1
3.4914e-46	0.616336	0.841	0.528	6.50902e-42	T/NK	Ptpn18
3.53942e-44	0.578322	0.399	0.131	6.59853e-40	T/NK	Vps37b
5.56426e-44	0.604119	0.498	0.205	1.03734e-39	T/NK	Atp11b
1.1452e-43	0.668845	0.871	0.661	2.135e-39	T/NK	Ifngr1
2.76106e-39	0.571355	0.601	0.283	5.14745e-35	T/NK	Pim1
3.58833e-38	0.756355	0.616	0.315	6.68973e-34	T/NK	Itga4
1.8687e-31	0.583213	0.694	0.524	3.48382e-27	T/NK	Anxa6
0	3.37128	1	0.091	0	Fb	Pi16
0	2.49313	0.993	0.087	0	Fb	Dpt
0	2.30744	0.985	0.047	0	Fb	Clec3b
0	2.02144	0.709	0.01	0	Fb	Cxcl13
0	1.85197	0.903	0.018	0	Fb	Smpd3
0	1.72045	0.746	0.04	0	Fb	Prg4
0	1.67073	0.948	0.073	0	Fb	Fndc1
0	1.62301	0.948	0.055	0	Fb	Pcolce2
0	1.51013	0.769	0.043	0	Fb	Sfrp2
0	1.3795	0.836	0.021	0	Fb	Pcsk6
0	1.15634	0.836	0.056	0	Fb	Vegfd
0	1.11567	0.881	0.063	0	Fb	Adgrd1
0	1.10574	0.679	0.024	0	Fb	Inmt
0	1.05727	0.821	0.049	0	Fb	Tmeff2
1.02119e-307	1.00386	0.679	0.037	1.9038e-303	Fb	Pla1a
3.25453e-306	1.38614	0.918	0.071	6.06742e-302	Fb	Dpep1
2.68814e-286	1.11018	0.828	0.06	5.0115e-282	Fb	Lrrn4cl
6.52564e-270	1.90654	0.978	0.102	1.21658e-265	Fb	Htra3
4.28818e-260	1.04597	0.799	0.061	7.99446e-256	Fb	Ifi205
8.60392e-256	1.7198	0.963	0.101	1.60403e-251	Fb	Scara5
2.45959e-254	1.35564	0.866	0.08	4.58542e-250	Fb	Gfpt2
4.17332e-251	1.58615	0.97	0.104	7.78032e-247	Fb	Sema3c
3.80639e-242	1.63808	0.94	0.102	7.09626e-238	Fb	Procr
5.35303e-232	1.03933	0.701	0.054	9.97965e-228	Fb	Cd55
3.78238e-231	1.44275	0.896	0.095	7.05148e-227	Fb	Ace
3.74513e-227	1.40161	0.866	0.085	6.98205e-223	Fb	Fbln1
1.58308e-223	1.32566	0.903	0.101	2.95133e-219	Fb	Scara3
2.42019e-221	1.19376	0.813	0.078	4.51196e-217	Fb	Tmem100
3.52103e-221	3.09437	1	0.141	6.56425e-217	Fb	C3
3.80655e-214	1.01945	0.754	0.065	7.09655e-210	Fb	Fst
4.54403e-211	1.98977	0.963	0.129	8.47143e-207	Fb	Tnxb
4.19853e-208	1.44599	0.881	0.102	7.82733e-204	Fb	Ackr3
2.42324e-199	1.31194	0.821	0.088	4.51764e-195	Fb	Sned1
3.90337e-197	1.69271	0.925	0.127	7.27706e-193	Fb	C1ra
4.20258e-188	2.29208	0.94	0.141	7.83487e-184	Fb	C4b
3.33605e-184	1.62337	0.948	0.139	6.2194e-180	Fb	Cd248
1.80727e-180	2.00348	0.925	0.136	3.36929e-176	Fb	Ly6c1
4.94335e-175	1.06862	0.739	0.08	9.21588e-171	Fb	Abca8b
9.31521e-170	1.3644	0.888	0.12	1.73663e-165	Fb	Abca8a
3.34192e-168	1.52357	0.91	0.128	6.23034e-164	Fb	Lbp
1.36593e-165	2.28327	1	0.191	2.5465e-161	Fb	Ccdc80
1.31899e-164	1.518	0.963	0.158	2.45899e-160	Fb	Loxl1
2.65629e-163	2.06481	0.993	0.196	4.95212e-159	Fb	C1s1
3.1421e-161	1.14167	0.5	0.037	5.85783e-157	Fb	Mmp3
8.31519e-159	1.71572	0.993	0.197	1.5502e-154	Fb	Ddr2
1.79395e-157	1.9516	0.985	0.183	3.34447e-153	Fb	Ogn
4.12135e-156	1.99193	0.873	0.138	7.68343e-152	Fb	Gpx3
1.61913e-150	1.85418	0.978	0.189	3.01854e-146	Fb	Col14a1
5.07402e-150	1.6096	0.963	0.173	9.4595e-146	Fb	Adamts5
5.36729e-147	1.30252	0.97	0.167	1.00062e-142	Fb	Itih5
7.17835e-146	1.46146	0.978	0.202	1.33826e-141	Fb	Gstm1
1.08961e-145	1.38989	0.948	0.163	2.03135e-141	Fb	Pdgfra
1.72699e-140	1.58395	0.948	0.172	3.21963e-136	Fb	Mfap5
1.98626e-140	1.0971	0.888	0.145	3.70298e-136	Fb	Ablim1
2.68666e-140	1.2277	0.851	0.142	5.00874e-136	Fb	Creb5
4.46963e-137	1.42824	0.888	0.17	8.33273e-133	Fb	Slc43a3
1.96438e-136	1.14491	0.896	0.14	3.6622e-132	Fb	Gas1
8.7427e-130	1.52086	0.948	0.204	1.6299e-125	Fb	Rarres2
1.99388e-127	1.03319	0.843	0.143	3.7172e-123	Fb	Ltbp1
5.00338e-127	1.25074	0.925	0.179	9.3278e-123	Fb	Islr
1.6131e-126	1.29615	0.806	0.124	3.00731e-122	Fb	Sfrp4
3.44826e-124	1.51855	0.97	0.232	6.4286e-120	Fb	Cd34
3.90283e-123	2.2128	1	0.292	7.27605e-119	Fb	Ly6a
9.25238e-123	1.16257	0.925	0.176	1.72492e-118	Fb	Ebf2
1.01123e-122	1.4906	0.978	0.213	1.88524e-118	Fb	Mmp2
6.1083e-122	1.79508	0.94	0.203	1.13877e-117	Fb	Igf1
3.73407e-121	1.37688	0.903	0.173	6.96143e-117	Fb	Efemp1
7.89648e-117	2.06797	1	0.292	1.47214e-112	Fb	Serping1
1.80396e-114	1.44667	0.933	0.226	3.36312e-110	Fb	Il11ra1
1.01499e-111	1.31876	0.933	0.241	1.89224e-107	Fb	Tgfbr3
1.35393e-108	1.04319	0.828	0.148	2.52413e-104	Fb	Cygb
3.72097e-108	1.27269	0.925	0.225	6.937e-104	Fb	Heg1
6.86046e-108	1.16892	0.925	0.194	1.279e-103	Fb	Serpinf1
3.75762e-107	1.07076	0.955	0.194	7.00532e-103	Fb	Prrx1
4.62693e-107	1.09104	0.866	0.176	8.62599e-103	Fb	Htra1
1.61971e-105	1.27968	0.94	0.221	3.01962e-101	Fb	Pcolce
1.21401e-98	2.22198	0.993	0.409	2.26328e-94	Fb	Plpp3
4.02113e-96	1.13811	0.94	0.23	7.4966e-92	Fb	Ebf1
3.62761e-88	1.8356	0.993	0.561	6.76295e-84	Fb	Nid1
5.00819e-88	2.80018	1	0.834	9.33677e-84	Fb	Gsn
4.57068e-87	1.76262	1	0.446	8.52111e-83	Fb	Fbn1
2.84721e-86	1.38298	0.955	0.295	5.30805e-82	Fb	Plac8
4.15508e-86	2.13662	1	0.645	7.74631e-82	Fb	Igfbp4
9.12487e-85	1.30228	0.97	0.399	1.70115e-80	Fb	Nfix
2.46811e-80	1.01349	0.903	0.281	4.6013e-76	Fb	Fgfr1
2.17765e-79	1.44832	1	0.671	4.0598e-75	Fb	Zbtb20
2.02387e-78	1.49139	0.993	0.751	3.77309e-74	Fb	Timp2
5.04024e-77	1.09065	0.896	0.269	9.39652e-73	Fb	Klf4
1.86929e-76	1.79129	1	0.554	3.48492e-72	Fb	Dcn
3.39615e-75	1.31542	0.993	0.621	6.33144e-71	Fb	Rnase4
1.58695e-73	1.19902	1	0.552	2.95856e-69	Fb	Axl
1.19404e-70	1.21686	0.985	0.645	2.22605e-66	Fb	Serpinb6a
2.12863e-66	1.42866	0.993	0.556	3.9684e-62	Fb	Fstl1
3.38467e-66	1.17647	1	0.743	6.31004e-62	Fb	Lrp1
5.90336e-60	1.02832	0.933	0.478	1.10056e-55	Fb	Man1a
4.0275e-57	1.08531	0.97	0.672	7.50846e-53	Fb	Man2a1
3.7567e-56	1.26496	1	0.664	7.00362e-52	Fb	Col3a1
5.10074e-56	1.01744	1	0.689	9.5093e-52	Fb	Col1a2
1.00799e-46	1.01493	0.813	0.337	1.8792e-42	Fb	Kcnq1ot1
3.22696e-41	1.01144	0.91	0.529	6.01603e-37	Fb	Igfbp5
0	3.22008	0.678	0.073	0	dMes	Sfrp4
0	2.75034	0.999	0.633	0	dMes	Col3a1
0	2.7189	0.95	0.083	0	dMes	Lox
0	2.65766	1	0.66	0	dMes	Col1a2
0	2.63364	0.999	0.627	0	dMes	Col1a1
0	2.15722	0.848	0.221	0	dMes	Postn
0	2.05778	0.94	0.31	0	dMes	Meg3
0	2.05745	0.997	0.456	0	dMes	Bgn
0	2.0219	0.819	0.146	0	dMes	Igf1
0	1.99572	1	0.514	0	dMes	Fstl1
0	1.97625	0.914	0.114	0	dMes	Ogn
0	1.97391	0.886	0.069	0	dMes	Gas1
0	1.93175	0.598	0.012	0	dMes	Cilp
0	1.91628	0.546	0.082	0	dMes	H19
0	1.89678	0.941	0.323	0	dMes	Igfbp6
0	1.89602	0.967	0.121	0	dMes	Prrx1
0	1.88638	0.477	0.114	0	dMes	C3
0	1.87772	0.989	0.613	0	dMes	Igfbp4
0	1.863	0.958	0.399	0	dMes	Fbn1
0	1.80386	0.754	0.25	0	dMes	Serping1
0	1.77879	0.894	0.105	0	dMes	Mfap5
0	1.75915	0.993	0.531	0	dMes	Col5a2
0	1.75506	0.787	0.134	0	dMes	Col14a1
0	1.74746	0.916	0.279	0	dMes	Loxl2
0	1.71373	0.895	0.236	0	dMes	Ly6a
0	1.70439	0.946	0.123	0	dMes	Serpinf1
0	1.70077	0.808	0.123	0	dMes	Cxcl12
0	1.65423	0.903	0.125	0	dMes	Ccdc80
0	1.64308	0.719	0.053	0	dMes	Aspn
0	1.62491	0.999	0.513	0	dMes	Dcn
0	1.61056	0.557	0.02	0	dMes	Sfrp1
0	1.58852	0.961	0.41	0	dMes	Col5a1
0	1.58506	0.864	0.174	0	dMes	Olfml3
0	1.57463	0.85	0.499	0	dMes	Igfbp5
0	1.55283	0.897	0.149	0	dMes	Mmp2
0	1.54678	0.731	0.028	0	dMes	Dpt
0	1.5463	0.664	0.09	0	dMes	Gpx3
0	1.53965	0.979	0.344	0	dMes	Nfix
0	1.53858	0.557	0.013	0	dMes	Gdf10
0	1.53714	0.898	0.123	0	dMes	Grb10
0	1.53528	1	0.758	0	dMes	Sparc
0	1.50303	0.895	0.158	0	dMes	Pcolce
0	1.48903	0.627	0.012	0	dMes	Angptl1
0	1.47565	0.999	0.641	0	dMes	Serpinh1
0	1.45448	0.968	0.288	0	dMes	Col6a1
0	1.44471	0.651	0.061	0	dMes	Col12a1
0	1.44229	0.921	0.087	0	dMes	Loxl1
0	1.43827	0.709	0.048	0	dMes	Chrdl1
0	1.43655	0.918	0.246	0	dMes	Rcn3
0	1.4235	0.75	0.151	0	dMes	Cthrc1
0	1.42201	0.895	0.095	0	dMes	Pdgfra
0	1.39325	0.941	0.152	0	dMes	Col6a2
0	1.3922	0.657	0.102	0	dMes	Cygb
0	1.33931	0.809	0.183	0	dMes	Csrp2
0	1.33776	0.767	0.144	0	dMes	C1s1
0	1.33444	0.614	0.018	0	dMes	Penk
0	1.33293	0.389	0.014	0	dMes	Sfrp2
0	1.3328	0.978	0.427	0	dMes	Fbln2
0	1.33172	0.999	0.983	0	dMes	Gnas
0	1.32896	0.686	0.08	0	dMes	Tnxb
0	1.31247	0.646	0.034	0	dMes	Fbln1
0	1.27602	0.808	0.12	0	dMes	Nbl1
0	1.25585	0.847	0.047	0	dMes	Gxylt2
0	1.24845	0.458	0.115	0	dMes	C4b
0	1.23691	0.983	0.401	0	dMes	Col6a3
0	1.21891	0.864	0.125	0	dMes	Medag
0	1.20138	0.97	0.52	0	dMes	Pmepa1
0	1.19336	0.93	0.157	0	dMes	Bicc1
0	1.16832	0.873	0.194	0	dMes	Dpysl3
0	1.16679	0.529	0.156	0	dMes	Gas6
0	1.16649	0.966	0.39	0	dMes	Nfib
0	1.16633	0.689	0.209	0	dMes	Col5a3
0	1.16173	0.485	0.097	0	dMes	Nov
0	1.13921	0.452	0.067	0	dMes	Ctgf
0	1.11982	0.532	0.049	0	dMes	Ccdc3
0	1.1067	0.656	0.089	0	dMes	Sod3
0	1.10272	0.727	0.086	0	dMes	Cd248
0	1.08711	0.926	0.314	0	dMes	Thbs2
0	1.07395	0.44	0.015	0	dMes	Clec3b
0	1.07084	0.537	0.026	0	dMes	Svep1
0	1.06708	0.845	0.341	0	dMes	Vcan
0	1.05747	0.756	0.11	0	dMes	Plod2
0	1.05421	0.911	0.323	0	dMes	Selenom
0	1.05081	0.626	0.022	0	dMes	Lrrc17
0	1.04214	0.785	0.091	0	dMes	Sulf1
0	1.03186	0.796	0.173	0	dMes	Il11ra1
0	1.02942	0.339	0.01	0	dMes	Mmp3
0	1.02495	0.871	0.283	0	dMes	Rbp1
0	1.00884	0.893	0.133	0	dMes	Ddr2
0	0.998626	0.919	0.298	0	dMes	Maged1
0	0.998371	0.511	0.082	0	dMes	Igfbp3
0	0.989877	0.614	0.084	0	dMes	C1ra
0	0.988773	0.999	0.659	0	dMes	Nedd4
0	0.976291	0.812	0.11	0	dMes	Ctsk
0	0.972095	0.945	0.34	0	dMes	Fkbp9
0	0.968111	0.464	0.1	0	dMes	Lbp
4.1779e-294	1.38136	0.406	0.091	7.78885e-290	dMes	Eln
1.26536e-286	1.16258	0.692	0.277	2.35902e-282	dMes	Col8a1
7.34197e-152	1.59439	0.901	0.829	1.36876e-147	dMes	Gsn
1.222e-91	1.65598	0.385	0.191	2.27818e-87	dMes	Cxcl14
0	3.44314	0.996	0.665	0	eMes	Apod
0	2.79053	0.973	0.204	0	eMes	Lum
0	2.41802	0.941	0.101	0	eMes	Ccl11
0	2.2556	0.995	0.698	0	eMes	Spp1
0	2.20296	0.904	0.105	0	eMes	Cp
0	2.10764	0.893	0.371	0	eMes	Ccl2
0	2.04131	0.93	0.503	0	eMes	Igfbp5
0	2.01517	1	0.526	0	eMes	Dcn
0	2.00262	0.888	0.142	0	eMes	Serpine2
0	1.87985	0.876	0.149	0	eMes	Col15a1
0	1.79822	0.903	0.13	0	eMes	Gpc3
0	1.76264	0.974	0.573	0	eMes	Timp1
0	1.73245	0.848	0.115	0	eMes	Il33
0	1.68804	0.751	0.026	0	eMes	Cdkn2a
0	1.62958	0.96	0.374	0	eMes	Tm4sf1
0	1.55609	0.869	0.066	0	eMes	Thbs4
0	1.54258	0.987	0.526	0	eMes	Aebp1
0	1.5416	0.939	0.271	0	eMes	Col8a1
0	1.50437	0.753	0.048	0	eMes	Fbn2
0	1.46529	0.805	0.142	0	eMes	Thy1
0	1.44825	0.798	0.011	0	eMes	6030408B16Rik
0	1.4025	0.77	0.124	0	eMes	Ptch1
0	1.39638	0.749	0.023	0	eMes	Crispld1
0	1.3949	0.926	0.349	0	eMes	Vcan
0	1.36411	0.8	0.052	0	eMes	Sox9
0	1.36222	0.863	0.159	0	eMes	Cthrc1
0	1.26915	0.814	0.139	0	eMes	Islr
0	1.26535	0.87	0.172	0	eMes	Mmp2
0	1.24134	0.997	0.527	0	eMes	Fstl1
0	1.23232	0.699	0.021	0	eMes	Wif1
0	1.2195	0.994	0.842	0	eMes	Ctsl
0	1.21844	0.696	0.085	0	eMes	Abca8a
0	1.20856	0.817	0.123	0	eMes	Itm2a
0	1.20591	0.802	0.089	0	eMes	Col11a1
0	1.19496	0.726	0.097	0	eMes	Rdh10
0	1.18749	0.759	0.086	0	eMes	Cpxm1
0	1.18286	0.828	0.132	0	eMes	Efemp1
0	1.14846	0.736	0.114	0	eMes	Ntrk2
0	1.1462	0.837	0.225	0	eMes	Plat
0	1.13954	0.999	0.83	0	eMes	Tgfbi
0	1.13119	0.964	0.419	0	eMes	Col6a3
0	1.12712	0.836	0.185	0	eMes	Bicc1
0	1.12506	0.77	0.153	0	eMes	Medag
0	1.09416	0.802	0.124	0	eMes	Pdgfra
0	1.09204	0.418	0.006	0	eMes	Saa1
0	1.08544	0.662	0.188	0	eMes	Pdrg1
0	1.07717	0.909	0.311	0	eMes	Col6a1
0	1.07517	0.82	0.162	0	eMes	Pdpn
0	1.07139	0.702	0.143	0	eMes	Ccl7
0	1.0531	0.838	0.181	0	eMes	Col6a2
0	1.04438	0.763	0.302	0	eMes	Cebpd
0	1.03876	0.66	0.021	0	eMes	Nipal1
0	1.03	0.997	0.651	0	eMes	Serpinh1
0	1.0298	0.604	0.056	0	eMes	Lgi2
0	1.02016	0.816	0.268	0	eMes	Map1lc3a
0	1.01189	0.725	0.064	0	eMes	Scara5
0	0.987874	0.968	0.536	0	eMes	Nid1
0	0.982048	0.73	0.161	0	eMes	Rtl8a
0	0.976296	0.571	0.003	0	eMes	A2m
0	0.971714	0.872	0.3	0	eMes	Loxl2
0	0.970275	0.668	0.075	0	eMes	Abi3bp
0	0.967569	0.96	0.414	0	eMes	Fbn1
0	0.946573	0.71	0.157	0	eMes	Thbd
0	0.935668	0.996	0.921	0	eMes	Rpl22l1
0	0.93104	0.628	0.062	0	eMes	Foxd1
0	0.923034	0.999	0.637	0	eMes	Col1a1
0	0.920519	0.694	0.044	0	eMes	Rida
0	0.918761	0.983	0.624	0	eMes	Igfbp4
0	0.914696	0.647	0.117	0	eMes	Rtl8b
0	0.908734	0.772	0.218	0	eMes	Phlda1
0	0.904204	0.709	0.115	0	eMes	Steap4
0	0.899379	0.999	0.765	0	eMes	Sparc
0	0.898733	0.633	0.029	0	eMes	Cdkn2b
0	0.882988	0.807	0.272	0	eMes	Ccnd2
0	0.875175	0.638	0.016	0	eMes	Bmp7
0	0.871721	0.666	0.07	0	eMes	Ms4a4d
0	0.871709	0.999	0.643	0	eMes	Col3a1
0	0.857134	0.514	0.042	0	eMes	Nt5e
0	0.842059	0.703	0.152	0	eMes	Dcbld2
0	0.82918	0.814	0.181	0	eMes	Sparcl1
0	0.825201	0.998	0.945	0	eMes	Sec61g
0	0.815631	0.747	0.141	0	eMes	Ebf2
0	0.813767	0.787	0.198	0	eMes	Cd34
0	0.809799	0.768	0.178	0	eMes	Maged2
0	0.800124	0.622	0.075	0	eMes	Srpx
0	0.797821	0.996	0.974	0	eMes	Cox6c
0	0.789676	0.71	0.111	0	eMes	Smoc2
0	0.78297	0.685	0.17	0	eMes	Akap12
0	0.768312	0.48	0.021	0	eMes	Ptx3
0	0.766942	0.696	0.159	0	eMes	Aig1
0	0.764812	0.691	0.164	0	eMes	Rasgrp2
0	0.763695	0.826	0.154	0	eMes	Serpinf1
0	0.758705	0.724	0.168	0	eMes	Sdc2
0	0.756994	0.541	0.011	0	eMes	Col26a1
0	0.749654	0.596	0.056	0	eMes	Cyp1b1
1.03102e-305	1.38824	0.861	0.417	1.92214e-301	eMes	Mgp
7.62832e-284	0.774351	0.764	0.289	1.42215e-279	eMes	Oaf
3.73505e-283	1.79281	0.804	0.45	6.96326e-279	eMes	Trf
3.54905e-265	0.769863	0.889	0.571	6.6165e-261	eMes	Cyb5a
5.11076e-197	0.756044	0.998	1	9.52798e-193	eMes	Fth1
0	3.13041	0.781	0.062	0	pMes	Aldh1a3
0	2.79856	0.623	0.031	0	pMes	Sfrp5
0	2.49071	0.934	0.098	0	pMes	Thbs4
0	2.47164	0.948	0.131	0	pMes	Smoc2
0	2.36089	0.88	0.057	0	pMes	Stra6
0	2.2145	0.776	0.103	0	pMes	Atp1a2
0	2.00363	0.719	0.11	0	pMes	H19
0	1.91703	0.986	0.321	0	pMes	Rbp1
0	1.7704	0.854	0.132	0	pMes	Fzd2
0	1.71406	0.818	0.116	0	pMes	Lbp
0	1.67673	0.521	0.05	0	pMes	Angptl7
0	1.59288	0.821	0.077	0	pMes	Fxyd6
0	1.58371	0.882	0.164	0	pMes	Gpc3
0	1.57014	0.816	0.15	0	pMes	Ptch1
0	1.53363	0.486	0.022	0	pMes	Epyc
0	1.51001	0.858	0.152	0	pMes	Cgnl1
0	1.47513	0.785	0.005	0	pMes	Mpzl2
0	1.3608	0.87	0.16	0	pMes	Efemp1
0	1.35475	0.778	0.075	0	pMes	Ildr2
0	1.34691	0.717	0.02	0	pMes	Cldn1
0	1.34535	0.814	0.142	0	pMes	Plk2
0	1.3428	0.67	0.024	0	pMes	Cxadr
0	1.29173	0.849	0.141	0	pMes	Cp
0	1.28318	0.63	0.059	0	pMes	Pcp4l1
0	1.22938	0.814	0.172	0	pMes	Gab1
0	1.22451	0.733	0.124	0	pMes	Rdh10
0	1.21721	0.684	0.087	0	pMes	Sox9
0	1.21675	0.731	0.038	0	pMes	Tenm2
0	1.2032	0.851	0.164	0	pMes	Ebf2
0	1.17799	0.795	0.082	0	pMes	Foxd1
0	1.12984	0.453	0.003	0	pMes	Msln
0	1.11311	0.717	0.028	0	pMes	Klf5
0	1.09716	0.781	0.129	0	pMes	Pkdcc
0	1.07619	0.719	0.098	0	pMes	Jup
0	1.06219	0.642	0.059	0	pMes	P2ry14
0	1.0593	0.677	0.08	0	pMes	Efnb2
0	1.02319	0.611	0.003	0	pMes	Ctxn3
0	1.02306	0.592	0.024	0	pMes	Chchd10
0	1.00241	0.573	0.014	0	pMes	Snhg11
0	0.966504	0.675	0.086	0	pMes	Fam213a
0	0.907905	0.733	0.105	0	pMes	Dock9
0	0.892854	0.637	0.088	0	pMes	Cdh11
0	0.887814	0.632	0.051	0	pMes	Itgbl1
0	0.879776	0.592	0.066	0	pMes	Dact1
0	0.875772	0.45	0.02	0	pMes	Cspg5
4.53734e-307	0.927275	0.733	0.128	8.45896e-303	pMes	Epb41l3
2.94546e-305	0.86516	0.705	0.114	5.49121e-301	pMes	Colec12
7.23724e-293	1.3742	0.889	0.212	1.34924e-288	pMes	Bicc1
1.11322e-292	1.29033	0.856	0.213	2.07537e-288	pMes	Tpcn1
1.70305e-286	1.15988	0.743	0.138	3.175e-282	pMes	Ntn1
1.7562e-285	0.88115	0.79	0.148	3.27409e-281	pMes	Prelp
1.64597e-283	0.932924	0.818	0.174	3.06859e-279	pMes	Lpar1
5.08973e-282	1.51233	0.955	0.28	9.48879e-278	pMes	Serping1
2.34226e-280	1.29236	0.849	0.215	4.36668e-276	pMes	Phlda3
1.49686e-258	0.900525	0.745	0.16	2.7906e-254	pMes	Stxbp6
2.14392e-249	0.886497	0.759	0.165	3.99691e-245	pMes	Scd1
1.67374e-242	1.08118	0.733	0.154	3.12036e-238	pMes	Hspb1
8.43747e-237	1.40291	0.929	0.3	1.573e-232	pMes	Col8a1
8.65826e-237	0.99767	0.783	0.162	1.61416e-232	pMes	Mfap5
4.34497e-235	1.04217	0.585	0.099	8.10032e-231	pMes	Slc16a1
1.15662e-234	0.929496	0.531	0.078	2.15629e-230	pMes	Lepr
1.26678e-231	1.25195	0.757	0.17	2.36167e-227	pMes	Islr
4.77419e-228	1.74965	0.958	0.365	8.90053e-224	pMes	Igfbp6
1.40946e-227	0.930744	0.703	0.157	2.62766e-223	pMes	Tmem64
1.24781e-225	1.87547	0.995	0.546	2.32629e-221	pMes	Dcn
1.59144e-224	0.879448	0.656	0.133	2.96693e-220	pMes	Slc12a2
2.19319e-224	1.09253	0.611	0.116	4.08876e-220	pMes	Ldhb
9.21516e-221	1.03537	0.821	0.211	1.71798e-216	pMes	Pcolce
2.28185e-220	0.952877	0.776	0.195	4.25406e-216	pMes	Tjp1
3.16203e-220	1.4742	0.733	0.17	5.89497e-216	pMes	Nbl1
1.99341e-216	2.31081	0.955	0.434	3.71632e-212	pMes	Mgp
1.97926e-212	0.865791	0.58	0.102	3.68994e-208	pMes	Flrt2
6.39272e-204	1.18383	0.922	0.363	1.19179e-199	pMes	Selenom
6.28616e-199	1.27299	0.722	0.221	1.17193e-194	pMes	Bzw2
4.169e-198	1.04376	0.748	0.21	7.77227e-194	pMes	Endod1
1.47617e-194	1.19979	0.995	0.975	2.75202e-190	pMes	Cox6c
1.91077e-191	1.06786	0.821	0.251	3.56225e-187	pMes	Plat
2.18574e-191	1.31425	0.939	0.389	4.07487e-187	pMes	Cfh
2.43074e-191	0.993113	0.917	0.321	4.53163e-187	pMes	Cav1
2.24949e-190	0.931246	0.835	0.249	4.19372e-186	pMes	Cpe
3.7042e-181	0.883171	0.816	0.255	6.90574e-177	pMes	Lama4
4.91683e-180	1.3068	0.684	0.187	9.16645e-176	pMes	Rtl8a
1.73416e-179	1.09162	0.946	0.433	3.233e-175	pMes	Sdc4
4.37427e-177	1.2436	0.979	0.473	8.15495e-173	pMes	Nr2f2
1.98367e-176	1.27192	0.993	0.563	3.69816e-172	pMes	Igfbp7
2.16635e-175	1.16316	0.512	0.1	4.03872e-171	pMes	Slc2a1
5.51966e-174	1.01796	0.691	0.186	1.02903e-169	pMes	Lamb2
8.56434e-171	1.30948	0.623	0.146	1.59665e-166	pMes	Ccl11
8.82221e-162	0.979225	0.993	0.554	1.64472e-157	pMes	Nid1
2.71467e-154	1.09746	0.998	0.777	5.06095e-150	pMes	Cd9
8.14893e-152	1.04279	0.767	0.276	1.51921e-147	pMes	Sh3pxd2a
1.54079e-147	0.994313	0.561	0.142	2.8725e-143	pMes	Rtl8b
1.27529e-146	2.18853	0.936	0.681	2.37753e-142	pMes	Apod
5.31012e-141	1.09459	0.858	0.412	9.89965e-137	pMes	Lmo4
2.58448e-132	0.928292	0.986	0.659	4.81825e-128	pMes	Il6st
3.11136e-124	0.91951	0.606	0.189	5.80051e-120	pMes	Rasgrp2
1.92393e-123	1.02344	0.889	0.542	3.58677e-119	pMes	Spred1
2.16053e-122	0.866224	1	0.987	4.02787e-118	pMes	S100a6
4.15181e-102	0.901249	0.611	0.215	7.74022e-98	pMes	Nupr1
1.6522e-69	1.01355	0.514	0.182	3.08019e-65	pMes	Gas6
0	4.82085	0.969	0.044	0	CL	Col2a1
0	3.16328	0.959	0	0	CL	3110079O15Rik
0	3.02205	0.969	0.004	0	CL	Col9a3
0	2.89754	0.959	0	0	CL	Hapln1
0	2.77601	0.938	0	0	CL	Col9a1
0	2.64871	0.918	0.002	0	CL	Col9a2
0	2.64106	0.938	0.001	0	CL	Acan
0	2.50283	0.897	0.005	0	CL	Col11a2
0	2.42189	0.907	0.001	0	CL	Cnmd
0	2.39536	0.825	0.023	0	CL	Comp
0	2.27042	0.856	0.001	0	CL	Matn3
0	1.57744	0.691	0.022	0	CL	Fmod
0	1.51849	0.619	0	0	CL	Mia
0	1.39562	0.557	0.001	0	CL	Scrg1
0	1.34687	0.505	0	0	CL	Ucma
0	0.962437	0.309	0	0	CL	Matn1
0	0.740433	0.268	0.003	0	CL	Fam180a
8.55879e-199	1.27578	0.464	0.019	1.59562e-194	CL	C1qtnf3
1.44831e-188	1.64141	0.66	0.045	2.70008e-184	CL	Fxyd2
1.15764e-168	2.90381	0.979	0.132	2.15819e-164	CL	Col11a1
1.09699e-132	1.15747	0.485	0.033	2.04512e-128	CL	1500015O10Rik
1.18209e-124	1.16241	0.464	0.031	2.20378e-120	CL	Epyc
1.2502e-95	1.35355	0.546	0.06	2.33074e-91	CL	Pcolce2
2.11891e-90	1.37379	0.577	0.073	3.95029e-86	CL	Gadd45g
4.8826e-89	1.44144	0.68	0.099	9.10263e-85	CL	Sox9
9.61922e-84	1.49846	0.66	0.106	1.79331e-79	CL	Col27a1
1.05651e-74	1.09068	0.526	0.072	1.96966e-70	CL	Chst11
1.45945e-64	1.17237	0.464	0.062	2.72084e-60	CL	Cyr61
7.27263e-62	1.49061	0.701	0.162	1.35584e-57	CL	Prelp
3.64288e-52	1.39495	1	0.444	6.79143e-48	CL	Mgp
1.87295e-49	0.782609	0.258	0.024	3.49173e-45	CL	Smpd3
4.65418e-48	1.36859	1	0.78	8.67679e-44	CL	Sparc
3.82417e-47	1.37189	0.608	0.15	7.12939e-43	CL	Egr1
8.42323e-46	1.392	0.567	0.134	1.57034e-41	CL	Fosb
2.59786e-41	0.796001	0.268	0.031	4.8432e-37	CL	AC160336.1
2.25571e-39	0.636705	1	1	4.20531e-35	CL	Rps29
7.17073e-38	1.31745	0.979	0.53	1.33684e-33	CL	Jun
9.51777e-38	0.725001	1	0.999	1.7744e-33	CL	Rpl38
3.0811e-37	0.991518	0.278	0.037	5.74409e-33	CL	Pth1r
7.94355e-36	1.57435	0.619	0.218	1.48092e-31	CL	Ppa1
1.0881e-35	1.07305	0.495	0.119	2.02855e-31	CL	Gadd45b
2.99019e-33	0.644116	0.309	0.049	5.57462e-29	CL	Clec11a
6.72879e-31	0.976864	0.546	0.169	1.25445e-26	CL	Plod2
6.53159e-29	0.551258	1	1	1.21768e-24	CL	Rpl39
7.91915e-27	0.512316	1	0.504	1.47637e-22	CL	Bgn
3.17329e-26	0.707433	0.938	0.443	5.91596e-22	CL	Sdc4
8.44119e-25	0.769663	1	0.672	1.57369e-20	CL	Serpinh1
2.34706e-23	0.8213	0.351	0.087	4.37563e-19	CL	Peg3
4.79075e-21	0.589893	0.866	0.394	8.9314e-17	CL	Fkbp9
6.40541e-20	0.872121	0.557	0.247	1.19416e-15	CL	Mfge8
1.9082e-19	0.458404	1	0.998	3.55746e-15	CL	Rpl34
1.05694e-18	0.918456	0.433	0.157	1.97045e-14	CL	Errfi1
3.61956e-18	0.784631	1	0.882	6.74794e-14	CL	Ubc
5.16779e-18	0.443608	1	0.999	9.63431e-14	CL	Rpl6
9.92902e-18	0.423328	1	0.999	1.85107e-13	CL	Rpl37
2.19492e-17	0.867677	0.351	0.113	4.09199e-13	CL	Papss2
7.59401e-17	0.458365	1	1	1.41575e-12	CL	Rps21
1.02259e-16	0.897356	0.546	0.272	1.90641e-12	CL	Klf4
1.21758e-16	0.546025	0.99	0.537	2.26994e-12	CL	Junb
1.81753e-16	0.524388	1	0.623	3.38843e-12	CL	Ckap4
2.64422e-16	0.483789	1	0.998	4.92963e-12	CL	Rps28
4.55417e-16	0.597958	0.258	0.063	8.49034e-12	CL	Id1
8.26869e-16	0.436963	1	0.998	1.54153e-11	CL	Rpl12
1.1858e-15	0.528895	0.979	0.543	2.21068e-11	CL	Hspg2
1.13714e-14	0.528033	0.959	0.551	2.11996e-10	CL	Lman1
1.83549e-14	0.376576	1	0.999	3.42191e-10	CL	Rpl32
1.6153e-13	0.440945	1	0.998	3.01141e-09	CL	Rpl21
9.0534e-13	0.462824	0.969	0.587	1.68783e-08	CL	Atf4
9.14128e-13	0.441183	0.866	0.484	1.70421e-08	CL	Cope
1.43597e-12	0.398726	0.897	0.488	2.67708e-08	CL	Ssr2
3.72208e-12	0.427759	0.866	0.476	6.93907e-08	CL	Cnpy2
7.28699e-12	0.404946	1	0.996	1.35851e-07	CL	Serf2
1.31971e-11	0.772455	1	0.738	2.46033e-07	CL	Mt1
1.48111e-11	0.49358	1	0.991	2.76123e-07	CL	H3f3b
1.50146e-11	0.505695	0.299	0.102	2.79917e-07	CL	Ctgf
1.95362e-11	0.814817	0.371	0.17	3.64213e-07	CL	Ifrd1
2.70264e-11	0.512854	0.588	0.307	5.03853e-07	CL	Rcn3
5.55447e-11	0.384099	1	0.613	1.03552e-06	CL	Kdelr2
3.18725e-10	0.48632	1	0.721	5.94199e-06	CL	Ostc
5.14509e-10	0.810148	0.412	0.221	9.592e-06	CL	Btg2
6.03456e-10	0.523803	0.268	0.096	1.12502e-05	CL	Cspg4
6.89391e-10	0.407655	0.979	0.612	1.28523e-05	CL	1810058I24Rik
5.88933e-09	0.834965	0.402	0.235	0.000109795	CL	Ier2
6.7418e-09	0.541708	1	0.851	0.000125687	CL	Ssr4
7.96029e-09	0.833714	0.33	0.154	0.000148404	CL	Atf3
1.087e-08	0.429792	0.289	0.115	0.000202649	CL	Col12a1
1.91648e-08	0.805526	0.454	0.301	0.00035729	CL	Tsc22d1
3.42998e-08	0.378434	1	0.926	0.000639451	CL	Rpl22l1
6.00674e-08	0.41642	1	0.948	0.00111984	CL	Sec61g
1.14779e-07	0.420329	0.99	0.739	0.00213982	CL	Sec62
1.85224e-07	0.609697	0.443	0.293	0.00345312	CL	Ppic
3.18843e-07	0.425348	0.32	0.15	0.00594418	CL	Cd24a
7.17088e-07	0.5969	0.289	0.148	0.0133687	CL	Msmo1
2.43563e-06	0.415066	1	0.749	0.0454075	CL	Emp1
2.63499e-06	0.417046	0.99	0.69	0.0491242	CL	Klf6
3.55172e-06	1.18633	0.412	0.293	0.0662148	CL	Fos
1.03733e-05	0.392679	1	0.849	0.193389	CL	Ost4
1.68125e-05	0.460031	0.443	0.309	0.313436	CL	Klf2
0.00563094	0.415924	0.278	0.206	1	CL	Snhg18
0.00631988	0.513215	0.351	0.31	1	CL	Rhob
0	1.98774	0.886	0.077	0	SC1	Chl1
0	1.92628	0.914	0.107	0	SC1	Itgb8
0	1.86519	0.878	0.082	0	SC1	Cadm4
0	1.77573	0.999	0.921	0	SC1	Dbi
0	1.76212	0.936	0.329	0	SC1	Thbs2
0	1.74548	0.944	0.129	0	SC1	Plp1
0	1.70547	0.686	0.072	0	SC1	Mpz
0	1.69792	0.907	0.117	0	SC1	Gpm6b
0	1.66731	0.909	0.2	0	SC1	Serinc5
0	1.66336	0.882	0.135	0	SC1	Ank3
0	1.65839	0.852	0.104	0	SC1	Tenm3
0	1.6566	0.75	0.019	0	SC1	Sostdc1
0	1.5709	0.822	0.049	0	SC1	Ncam1
0	1.56477	0.945	0.443	0	SC1	Fbln2
0	1.54469	0.855	0.076	0	SC1	Lgi4
0	1.52454	0.843	0.076	0	SC1	Aatk
0	1.49291	0.803	0.126	0	SC1	Itih5
0	1.44937	0.749	0.114	0	SC1	Scn7a
0	1.44868	0.779	0.094	0	SC1	Vwa1
0	1.38854	0.816	0.09	0	SC1	Cdh19
0	1.36778	0.979	0.546	0	SC1	Arpc1a
0	1.36666	0.872	0.328	0	SC1	Pmp22
0	1.35146	0.882	0.159	0	SC1	Metrn
0	1.34854	0.818	0.117	0	SC1	Crlf1
0	1.33824	0.89	0.195	0	SC1	Tubb2b
0	1.33392	0.691	0.101	0	SC1	Tnc
0	1.329	0.847	0.214	0	SC1	Tead1
0	1.32679	0.972	0.398	0	SC1	Gatm
0	1.31945	0.771	0.07	0	SC1	Ptn
0	1.28431	0.841	0.176	0	SC1	Gpc1
0	1.28101	0.702	0.068	0	SC1	Hbegf
0	1.27846	0.828	0.162	0	SC1	Matn2
0	1.24797	0.996	0.75	0	SC1	Tuba1a
0	1.23823	0.853	0.2	0	SC1	Col18a1
0	1.23185	0.809	0.163	0	SC1	Fxyd1
0	1.20088	0.776	0.147	0	SC1	Col16a1
0	1.20076	0.831	0.224	0	SC1	Prnp
0	1.19838	0.799	0.073	0	SC1	Cadm1
0	1.19147	0.941	0.415	0	SC1	Dst
0	1.18153	0.734	0.049	0	SC1	Aspa
0	1.16183	0.959	0.456	0	SC1	S100a16
0	1.15547	0.736	0.038	0	SC1	Erbb3
0	1.13516	0.72	0.042	0	SC1	Gjc3
0	1.12993	0.802	0.092	0	SC1	Nr2f1
0	1.11372	0.811	0.131	0	SC1	Gfra1
0	1.10965	0.808	0.18	0	SC1	Cnp
0	1.10621	0.628	0.018	0	SC1	Epha5
0	1.10081	0.798	0.165	0	SC1	Nes
0	1.08942	0.801	0.165	0	SC1	Cxcl14
0	1.08369	0.738	0.074	0	SC1	Atp1a2
0	1.0627	0.936	0.534	0	SC1	Pmepa1
0	1.06063	0.789	0.11	0	SC1	Tmod2
0	1.05758	0.795	0.06	0	SC1	Sox10
0	1.05637	0.645	0.022	0	SC1	Kcna2
0	1.05492	0.881	0.414	0	SC1	Sdc4
0	1.05252	0.718	0.096	0	SC1	Ngfr
0	1.04778	0.947	0.611	0	SC1	Ccnd1
0	1.04674	0.715	0.026	0	SC1	Mmp17
0	1.04499	0.955	0.573	0	SC1	Timp1
0	1.04031	0.959	0.766	0	SC1	Anxa1
0	1.03818	0.735	0.149	0	SC1	Gas2l3
0	1.03569	0.891	0.463	0	SC1	Lbh
0	1.03081	0.748	0.075	0	SC1	Cyp2j6
0	1.02711	0.921	0.518	0	SC1	Hspg2
0	1.02244	0.947	0.495	0	SC1	Dag1
0	1.01761	0.777	0.124	0	SC1	Sorbs1
0	1.01458	0.673	0.05	0	SC1	Sbspon
0	1.01232	0.996	0.83	0	SC1	Fkbp1a
0	1.00834	0.985	0.373	0	SC1	Cryab
0	1.00728	1	0.787	0	SC1	Cd63
0	1.00168	0.598	0.083	0	SC1	Col28a1
0	0.987982	0.623	0.034	0	SC1	Kcna1
0	0.984668	0.695	0.055	0	SC1	Dhh
0	0.979657	0.92	0.476	0	SC1	Itga6
0	0.978606	1	0.977	0	SC1	Arpc1b
0	0.977465	0.904	0.486	0	SC1	Nudt4
0	0.966967	0.75	0.117	0	SC1	Sema7a
0	0.95906	0.964	0.525	0	SC1	Axl
0	0.957314	0.762	0.172	0	SC1	Angptl2
0	0.939723	0.773	0.089	0	SC1	Mal
0	0.929234	0.72	0.093	0	SC1	Reln
0	0.927567	1	0.991	0	SC1	Vim
0	0.92362	0.737	0.121	0	SC1	Cd59a
0	0.920304	0.716	0.119	0	SC1	Tln2
0	0.919908	0.809	0.223	0	SC1	Cpe
0	0.919074	0.75	0.19	0	SC1	Bmp1
0	0.918862	0.723	0.122	0	SC1	Stard13
0	0.914351	0.416	0.029	0	SC1	Ucn2
0	0.905838	0.956	0.527	0	SC1	Aebp1
0	0.895897	0.707	0.134	0	SC1	Entpd2
0	0.891539	0.69	0.142	0	SC1	Fam198b
0	0.88138	0.671	0.049	0	SC1	Sox2
0	0.879809	0.719	0.064	0	SC1	Tspan15
0	0.875044	0.772	0.162	0	SC1	Pdgfa
0	0.870031	0.707	0.1	0	SC1	Itga7
0	0.868677	0.755	0.122	0	SC1	Dmd
0	0.866678	0.707	0.062	0	SC1	Plekhb1
0	0.862913	0.694	0.079	0	SC1	Sema3b
5.56982e-306	1.14839	0.693	0.238	1.03838e-301	SC1	Stmn1
2.1489e-104	0.875298	0.363	0.136	4.00619e-100	SC1	Top2a
0	1.15722	0.944	0.38	0	SC2	Cryab
1.55747e-138	0.454269	0.951	0.551	2.90359e-134	SC2	Arpc1a
1.67641e-118	1.09562	1	0.964	3.12533e-114	SC2	Prdx1
7.59441e-116	0.446123	1	0.991	1.41583e-111	SC2	Vim
3.93764e-112	0.336334	0.9	0.464	7.34094e-108	SC2	S100a16
1.39714e-103	0.49679	0.999	0.95	2.60468e-99	SC2	Lgals1
7.05428e-95	0.361484	0.99	0.752	1.31513e-90	SC2	Tuba1a
1.24087e-93	0.40425	1	1	2.31335e-89	SC2	Rps2
1.86317e-93	0.273127	0.806	0.413	3.4735e-89	SC2	Gatm
6.15345e-83	0.255519	0.429	0.17	1.14719e-78	SC2	Plp1
4.51958e-82	0.532937	0.998	0.892	8.42585e-78	SC2	Hsp90aa1
1.96221e-78	0.572357	0.384	0.165	3.65815e-74	SC2	Gfra1
6.01089e-78	0.719751	0.995	0.803	1.12061e-73	SC2	Lgals3
1.50216e-73	0.313826	1	0.999	2.80048e-69	SC2	Ppia
6.34891e-69	0.335026	0.899	0.577	1.18363e-64	SC2	Vat1
9.80939e-69	0.457586	0.994	0.913	1.82877e-64	SC2	Lars2
3.55248e-66	0.396242	0.937	0.62	6.62289e-62	SC2	Sec11c
7.49177e-65	0.390654	0.996	0.831	1.39669e-60	SC2	Fkbp1a
6.03703e-64	0.361225	0.995	0.892	1.12548e-59	SC2	Tuba1b
2.85482e-62	0.25429	0.846	0.513	5.32224e-58	SC2	Tubb2a
3.4819e-62	0.329291	0.914	0.626	6.49131e-58	SC2	Cct7
2.53264e-61	0.490071	0.982	0.76	4.72161e-57	SC2	Esd
6.63156e-61	0.261315	0.841	0.533	1.23632e-56	SC2	Ube2s
8.37532e-61	0.406747	0.976	0.704	1.56141e-56	SC2	Hspd1
2.02381e-60	0.364969	0.996	0.843	3.77299e-56	SC2	Ran
3.83631e-60	0.335363	0.93	0.647	7.15204e-56	SC2	Kpnb1
7.86078e-58	0.368506	0.997	0.935	1.46548e-53	SC2	Tubb5
8.2249e-58	0.271814	0.997	0.789	1.53337e-53	SC2	Cd63
2.90803e-57	0.333551	0.852	0.565	5.42144e-53	SC2	Pea15a
2.45358e-54	0.402144	0.937	0.614	4.57422e-50	SC2	Ccnd1
5.37028e-54	0.321145	0.99	0.734	1.00118e-49	SC2	Lmna
6.23345e-53	0.294045	1	0.999	1.1621e-48	SC2	Rps26
3.46786e-52	0.278342	0.828	0.542	6.46513e-48	SC2	Eif1ax
7.72006e-52	0.332091	0.929	0.648	1.43925e-47	SC2	Rnf7
6.30978e-51	0.280102	0.858	0.573	1.17633e-46	SC2	Hspa9
1.78808e-50	0.28822	0.997	0.922	3.33352e-46	SC2	Dbi
8.63637e-50	0.296708	1	1	1.61008e-45	SC2	Rplp1
1.56842e-49	0.315227	0.998	0.955	2.924e-45	SC2	Anxa2
3.12158e-49	0.284848	0.807	0.543	5.81957e-45	SC2	Cct3
1.76652e-48	0.29297	0.828	0.563	3.29333e-44	SC2	Banf1
2.07815e-48	0.33016	1	0.997	3.87429e-44	SC2	Rpl12
1.51182e-47	0.295757	1	1	2.81849e-43	SC2	Rplp0
1.87837e-47	0.265591	0.84	0.57	3.50185e-43	SC2	Ube2m
3.16214e-47	0.304237	0.972	0.708	5.89518e-43	SC2	Ybx3
7.32955e-47	0.359218	0.987	0.724	1.36645e-42	SC2	Mt1
2.96002e-46	0.266997	0.844	0.568	5.51837e-42	SC2	Psmb5
1.02836e-44	0.281266	1	0.996	1.91717e-40	SC2	Rps17
4.35581e-44	0.278173	0.897	0.616	8.12054e-40	SC2	Uqcc2
1.01126e-43	0.290585	0.973	0.699	1.88529e-39	SC2	Hmgn1
1.04923e-43	0.330576	0.762	0.511	1.95608e-39	SC2	Coro1c
2.6252e-43	0.285587	0.936	0.646	4.89416e-39	SC2	Cycs
2.77307e-42	0.267883	1	0.998	5.16983e-38	SC2	Hsp90ab1
6.81126e-42	0.3341	0.972	0.766	1.26982e-37	SC2	Ppp1r14b
1.29395e-41	0.293699	0.94	0.683	2.41231e-37	SC2	Pdap1
3.94998e-40	0.257784	0.887	0.611	7.36395e-36	SC2	Ndufab1
1.97823e-39	0.250181	0.893	0.623	3.68801e-35	SC2	Capn2
4.48769e-39	0.296946	0.998	0.929	8.36639e-35	SC2	Txn1
8.7822e-37	0.250381	0.811	0.571	1.63726e-32	SC2	Mlf2
4.0714e-34	0.280543	0.997	0.917	7.59031e-30	SC2	Eif5a
1.0765e-32	0.253228	0.941	0.684	2.00692e-28	SC2	Bola2
1.88195e-32	0.388767	0.638	0.462	3.50852e-28	SC2	Gmfb
4.18947e-32	0.281747	0.999	0.961	7.81042e-28	SC2	Eef1g
2.85614e-31	0.906797	0.331	0.201	5.32471e-27	SC2	Nes
4.25775e-31	0.285506	0.998	0.982	7.93771e-27	SC2	Npm1
1.27117e-30	0.302568	0.997	0.967	2.36984e-26	SC2	Ywhae
2.62645e-29	0.541283	0.275	0.165	4.89649e-25	SC2	Fam102a
5.7297e-27	0.276132	0.767	0.54	1.06819e-22	SC2	Naa50
1.43119e-26	0.352424	0.991	0.846	2.66817e-22	SC2	Hspe1
2.9894e-26	0.298427	0.721	0.51	5.57315e-22	SC2	Map4
2.81405e-25	0.291555	0.972	0.775	5.24624e-21	SC2	Pebp1
1.6211e-24	0.394225	0.996	0.929	3.02221e-20	SC2	Ncl
8.3205e-23	0.268327	0.997	0.913	1.55119e-18	SC2	Nap1l1
1.91471e-21	0.273338	0.975	0.786	3.56959e-17	SC2	Ywhaq
3.74809e-20	0.261793	0.975	0.777	6.98757e-16	SC2	Timm13
5.41073e-19	0.423814	0.906	0.65	1.00872e-14	SC2	Cyb5r3
5.80187e-18	0.25953	0.337	0.237	1.08164e-13	SC2	Tubb2b
9.92296e-17	0.26136	0.991	0.824	1.84994e-12	SC2	Nme1
1.41786e-16	0.273479	0.97	0.75	2.64332e-12	SC2	Taldo1
2.35967e-14	0.348393	0.962	0.764	4.39914e-10	SC2	Map4k4
1.36563e-10	0.252529	0.984	0.831	2.54595e-06	SC2	Eif2s2
1.03092e-09	0.878071	0.305	0.268	1.92194e-05	SC2	Map1b
2.07852e-05	0.309791	0.267	0.253	0.387499	SC2	Odc1
0.00128604	0.253199	0.997	0.998	1	SC2	mt-Nd1
0	2.59739	0.997	0.386	0	SC3	Cryab
0	2.44248	0.99	0.146	0	SC3	Plp1
0	2.18905	0.473	0.026	0	SC3	Syt4
0	2.13824	0.776	0.082	0	SC3	Mpz
0	1.9708	0.941	0.14	0	SC3	Gfra1
0	1.88912	0.973	0.123	0	SC3	Itgb8
0	1.87424	0.886	0.102	0	SC3	Ngfr
0	1.85191	0.99	0.504	0	SC3	Dag1
0	1.85018	0.744	0.029	0	SC3	Gjb1
0	1.80961	0.982	0.496	0	SC3	Timp3
0	1.80721	0.806	0.14	0	SC3	Fam102a
0	1.60014	0.835	0.031	0	SC3	Pou3f1
0	1.57818	0.56	0.064	0	SC3	Hmga2
0	1.55577	0.859	0.135	0	SC3	Tnfrsf12a
0	1.53066	0.9	0.06	0	SC3	Nrcam
0	1.50626	0.999	0.792	0	SC3	Cd63
0	1.48535	0.885	0.052	0	SC3	Gldn
0	1.47532	0.995	0.727	0	SC3	Mt1
0	1.4618	0.937	0.215	0	SC3	Serinc5
0	1.41101	0.777	0.088	0	SC3	Gadd45b
0	1.40639	0.862	0.107	0	SC3	Itga7
0	1.33328	0.803	0.147	0	SC3	Vamp5
0	1.33166	0.906	0.21	0	SC3	Tubb2b
0	1.329	0.903	0.224	0	SC3	Mt2
0	1.30515	0.941	0.513	0	SC3	Tubb2a
0	1.30255	0.874	0.189	0	SC3	Gpc1
0	1.28935	0.973	0.556	0	SC3	Arpc1a
0	1.28861	0.887	0.13	0	SC3	Crlf1
0	1.26699	0.732	0.062	0	SC3	Clcf1
0	1.22964	0.791	0.08	0	SC3	Ppfibp2
0	1.20427	0.881	0.176	0	SC3	Nes
0	1.19304	0.985	0.41	0	SC3	Gatm
0	1.18375	0.788	0.082	0	SC3	Met
0	1.18054	0.85	0.086	0	SC3	Sema3b
0	1.14904	0.688	0.167	0	SC3	Srxn1
0	1.13916	0.776	0.213	0	SC3	Nceh1
0	1.13605	0.687	0.128	0	SC3	Atf3
0	1.113	0.829	0.165	0	SC3	Ss18l2
0	1.11074	0.821	0.088	0	SC3	Cadm1
0	1.10342	0.85	0.233	0	SC3	Plekha1
0	1.10322	0.719	0.034	0	SC3	Hcn1
0	1.07455	0.777	0.196	0	SC3	Ddhd1
0	1.04782	0.603	0.054	0	SC3	Btc
0	1.04675	0.556	0.074	0	SC3	Tubb3
0	1.03573	0.592	0.024	0	SC3	Gdnf
0	1.03495	0.765	0.174	0	SC3	Dclk1
0	1.03413	0.808	0.121	0	SC3	Slc6a8
0	1.03092	0.712	0.055	0	SC3	Pex5l
0	1.02925	0.755	0.116	0	SC3	Nav2
0	1.02735	0.718	0.061	0	SC3	Sox2
0	1.0183	0.74	0.118	0	SC3	Runx2
0	0.999561	0.817	0.103	0	SC3	Reln
0	0.99901	0.555	0.029	0	SC3	Mt3
0	0.989953	0.841	0.235	0	SC3	Cpe
0	0.989384	0.813	0.1	0	SC3	Tanc2
0	0.983778	0.826	0.239	0	SC3	Shtn1
0	0.978596	0.606	0.096	0	SC3	Gadd45a
0	0.967557	0.8	0.159	0	SC3	Ahnak2
0	0.965159	0.75	0.055	0	SC3	Ttc9
0	0.963732	0.814	0.104	0	SC3	Cadm4
0	0.963094	0.858	0.312	0	SC3	Kmt5a
0	0.96143	0.819	0.134	0	SC3	Dmd
0	0.940886	0.636	0.104	0	SC3	Sacs
0	0.93417	0.781	0.196	0	SC3	Cnp
0	0.920888	0.806	0.156	0	SC3	Ank3
0	0.918867	0.823	0.143	0	SC3	Pcbp4
0	0.904778	0.61	0.13	0	SC3	Atrn
0	0.904699	0.871	0.273	0	SC3	Cttn
0	0.898167	0.742	0.194	0	SC3	Lhfpl2
0	0.8955	0.812	0.219	0	SC3	Sh3bp5
0	0.894992	0.735	0.133	0	SC3	Tex2
0	0.88935	0.674	0.099	0	SC3	Hmga1
0	0.885693	0.729	0.104	0	SC3	Mras
0	0.881667	0.808	0.076	0	SC3	Sox10
0	0.881515	0.795	0.169	0	SC3	Otud7b
0	0.863932	0.779	0.104	0	SC3	Mal
0	0.858359	0.844	0.29	0	SC3	Cfl2
6.01255e-308	0.985492	0.94	0.58	1.12092e-303	SC3	Vat1
7.75527e-304	0.853566	0.795	0.263	1.44581e-299	SC3	Trio
1.64986e-298	1.08262	0.774	0.256	3.07583e-294	SC3	Sox4
1.0025e-295	0.967381	0.622	0.155	1.86895e-291	SC3	Gstp1
2.37132e-291	0.979865	0.965	0.708	4.42084e-287	SC3	Hspd1
4.18881e-289	0.882813	0.667	0.166	7.8092e-285	SC3	Gas2l3
2.07049e-288	0.873948	0.923	0.536	3.86002e-284	SC3	Anxa7
8.8074e-287	1.15303	0.992	0.755	1.64196e-282	SC3	Tuba1a
8.97316e-285	1.04979	0.973	0.71	1.67287e-280	SC3	Scd2
1.19241e-274	1.00676	0.89	0.39	2.22301e-270	SC3	Plpp3
6.87573e-263	1.1666	0.941	0.636	1.28184e-258	SC3	Abca1
1.45424e-260	0.867907	0.764	0.282	2.71114e-256	SC3	Txnrd1
1.16414e-253	1.24185	0.669	0.209	2.1703e-249	SC3	Sgk1
1.89948e-241	0.932814	1	0.991	3.5412e-237	SC3	Vim
1.79652e-239	1.74248	0.997	0.965	3.34926e-235	SC3	Prdx1
1.64937e-227	0.917987	0.813	0.382	3.07493e-223	SC3	Sqstm1
2.12832e-196	1.23171	0.863	0.628	3.96782e-192	SC3	Sec11c
4.62335e-196	1.25596	0.919	0.767	8.61931e-192	SC3	Esd
7.95295e-190	0.922592	0.849	0.516	1.48267e-185	SC3	Jun
1.87385e-170	2.09442	0.906	0.811	3.49343e-166	SC3	Lgals3
3.2199e-158	1.00009	0.59	0.202	6.00286e-154	SC3	Mbp
4.19638e-156	0.89774	0.924	0.755	7.82332e-152	SC3	Taldo1
1.96305e-140	1.14985	0.742	0.347	3.65972e-136	SC3	Pmp22
0	1.1124	0.573	0.086	0	EC1	Ctla2a
0	0.851117	0.558	0.072	0	EC1	Pecam1
5.02003e-285	0.890049	0.524	0.076	9.35883e-281	EC1	Egfl7
4.97186e-226	0.943759	0.35	0.043	9.26904e-222	EC1	Cldn5
1.17723e-188	0.622061	0.379	0.058	2.1947e-184	EC1	Rasip1
1.11253e-182	0.735084	0.461	0.087	2.07409e-178	EC1	Esam
1.56727e-180	0.659783	0.373	0.058	2.92186e-176	EC1	Plvap
6.69411e-178	0.605757	0.321	0.045	1.24798e-173	EC1	Sox18
2.57238e-175	0.641994	0.339	0.049	4.79568e-171	EC1	Mmrn2
8.92043e-172	0.648525	0.355	0.054	1.66304e-167	EC1	Ptprb
7.56954e-168	0.820836	0.451	0.093	1.41119e-163	EC1	Lrg1
1.47509e-164	0.714483	0.454	0.093	2.75001e-160	EC1	Cdh5
1.35645e-160	0.654197	0.37	0.064	2.52884e-156	EC1	Podxl
1.08868e-150	0.701142	0.506	0.121	2.02962e-146	EC1	Epas1
5.70548e-147	0.648065	0.388	0.074	1.06367e-142	EC1	Flt1
7.02951e-146	0.671365	0.359	0.068	1.31051e-141	EC1	C130074G19Rik
2.56518e-142	0.532391	0.284	0.043	4.78226e-138	EC1	Grrp1
1.98832e-114	0.694577	0.32	0.067	3.70682e-110	EC1	Clu
4.44467e-114	0.566305	0.975	0.56	8.2862e-110	EC1	Igfbp7
4.04191e-113	0.542696	0.355	0.08	7.53534e-109	EC1	Emcn
8.65294e-113	0.548883	0.343	0.073	1.61317e-108	EC1	Adgrf5
2.31571e-98	0.521265	0.838	0.399	4.31718e-94	EC1	Tm4sf1
4.90871e-96	0.451674	0.255	0.049	9.15131e-92	EC1	Tie1
1.35408e-94	0.512356	0.271	0.057	2.52441e-90	EC1	Id1
1.21663e-93	0.730155	0.443	0.151	2.26816e-89	EC1	Cd200
1.16746e-92	0.516707	0.442	0.132	2.17649e-88	EC1	Ly6c1
4.64916e-91	0.500363	0.269	0.057	8.66743e-87	EC1	Vwf
2.46254e-90	0.431563	0.262	0.054	4.5909e-86	EC1	Kdr
2.93344e-89	0.498443	0.325	0.083	5.46881e-85	EC1	Tspan7
9.21713e-86	0.539568	0.359	0.103	1.71835e-81	EC1	Ecscr
3.95633e-81	0.488201	0.271	0.063	7.37578e-77	EC1	Cyyr1
1.41366e-76	0.556868	0.39	0.126	2.63548e-72	EC1	Cavin2
2.75124e-75	0.569063	0.4	0.139	5.12913e-71	EC1	Eng
5.52213e-72	0.524003	0.341	0.108	1.02949e-67	EC1	S1pr1
2.23245e-69	0.563391	0.377	0.131	4.16195e-65	EC1	Ramp2
7.98774e-67	0.529562	0.668	0.324	1.48915e-62	EC1	Cav1
1.62492e-63	0.715823	0.957	0.916	3.02934e-59	EC1	Lars2
5.88254e-62	0.964171	0.321	0.107	1.09668e-57	EC1	Fabp4
5.48169e-56	0.46709	0.264	0.079	1.02195e-51	EC1	Prex2
1.44586e-54	0.430199	0.777	0.432	2.69551e-50	EC1	Nfib
2.43554e-52	0.538524	0.996	0.997	4.54058e-48	EC1	Rpl36a
1.13173e-49	0.332264	0.939	0.608	2.10989e-45	EC1	Cavin1
6.40818e-49	0.472787	0.996	1	1.19468e-44	EC1	Rps12
1.45138e-48	0.667705	0.993	1	2.70581e-44	EC1	Rps21
7.24648e-48	0.53282	0.993	1	1.35096e-43	EC1	Rps20
1.22775e-45	0.401285	0.862	0.562	2.28889e-41	EC1	Ehd4
8.85461e-44	0.66885	0.794	0.54	1.65076e-39	EC1	Glul
4.13869e-42	0.530183	0.382	0.187	7.71576e-38	EC1	Entpd1
1.96961e-41	0.56295	0.438	0.225	3.67195e-37	EC1	Id3
3.7917e-39	0.489512	0.454	0.251	7.06887e-35	EC1	Crip2
3.46414e-37	0.421489	0.294	0.117	6.45819e-33	EC1	Sorbs2
3.61448e-37	0.374201	0.273	0.107	6.73847e-33	EC1	Jam2
7.25322e-37	0.532296	0.993	0.999	1.35222e-32	EC1	Rps27
1.17523e-35	0.499115	0.294	0.131	2.19099e-31	EC1	Slc9a3r2
1.46118e-35	0.37158	0.995	1	2.72408e-31	EC1	Rps14
2.50786e-33	0.357349	0.993	0.998	4.6754e-29	EC1	Rps6
4.86804e-33	0.523238	0.296	0.131	9.0755e-29	EC1	Mal
4.95601e-32	0.35845	0.996	0.999	9.23949e-28	EC1	Rps7
7.91688e-32	0.336489	0.98	0.837	1.47594e-27	EC1	Fkbp1a
3.89821e-28	0.430043	0.952	0.703	7.26742e-24	EC1	Tcf4
4.80354e-27	0.2863	1	1	8.95523e-23	EC1	Rpl41
7.7795e-27	0.396795	0.993	0.999	1.45033e-22	EC1	Rps15
2.71823e-26	0.367109	0.993	0.998	5.06759e-22	EC1	Rpl22
3.56744e-26	0.507369	0.415	0.252	6.65077e-22	EC1	Gng11
1.53857e-25	0.312309	0.998	0.999	2.86836e-21	EC1	Rpl28
1.58617e-25	0.312411	0.986	0.933	2.95709e-21	EC1	Ifitm3
7.18595e-25	0.428183	0.993	1	1.33968e-20	EC1	Rps8
1.51704e-24	0.347231	0.995	1	2.82822e-20	EC1	Rpl23
8.6331e-24	0.311684	0.995	1	1.60947e-19	EC1	Rps23
1.85436e-23	0.361167	0.991	0.997	3.45708e-19	EC1	Rpl35
3.18744e-23	0.360121	0.998	0.999	5.94234e-19	EC1	Rps26
4.26368e-23	0.290403	0.415	0.232	7.94878e-19	EC1	Cd34
1.41147e-21	0.27289	0.995	1	2.63141e-17	EC1	Rpl9
3.1628e-21	0.369365	0.991	0.996	5.89641e-17	EC1	Rpl15
3.80698e-21	0.467726	0.995	1	7.09735e-17	EC1	Rpl39
5.00454e-21	0.348377	0.336	0.196	9.32997e-17	EC1	Ets1
2.50138e-20	0.298707	0.987	0.986	4.66333e-16	EC1	Rpl27
3.0977e-20	0.55496	0.395	0.285	5.77504e-16	EC1	Ece1
4.99074e-20	0.429353	0.993	0.999	9.30423e-16	EC1	Rps11
7.15016e-20	0.322414	0.993	0.996	1.33301e-15	EC1	Rps17
1.04846e-19	0.303045	0.995	0.998	1.95464e-15	EC1	Rpl5
2.36693e-19	0.303626	0.986	0.999	4.41267e-15	EC1	Gm42418
2.28995e-18	0.360957	0.989	0.984	4.26916e-14	EC1	Rpl31
5.68151e-17	0.296044	0.995	0.998	1.0592e-12	EC1	Rps28
1.78632e-16	0.319309	0.993	0.998	3.33023e-12	EC1	Rps25
1.92428e-16	0.429414	0.995	0.999	3.58743e-12	EC1	Rpl30
2.06923e-16	0.340443	0.993	0.999	3.85766e-12	EC1	Rpl23a
3.21613e-16	0.34344	0.993	1	5.99583e-12	EC1	Rpl37a
3.66969e-16	0.27321	0.986	0.973	6.84141e-12	EC1	Tmsb10
1.02869e-15	0.333204	0.917	0.778	1.91779e-11	EC1	AY036118
1.07104e-15	0.347617	0.995	0.999	1.99675e-11	EC1	Rpl10
1.14694e-15	0.370289	0.345	0.227	2.13824e-11	EC1	Heg1
1.22093e-15	0.312192	0.259	0.148	2.27618e-11	EC1	Crim1
2.77394e-15	0.296894	0.284	0.17	5.17145e-11	EC1	Tspan13
4.66858e-15	0.332778	0.996	0.999	8.70363e-11	EC1	Rpl24
3.45958e-14	0.296991	0.995	1	6.4497e-10	EC1	Rps16
6.36609e-14	0.329854	0.995	0.999	1.18683e-09	EC1	Rpl37
1.7255e-08	0.276439	0.995	1	0.000321685	EC1	Rps27a
2.7546e-08	0.294129	0.325	0.251	0.000513541	EC1	Pdlim1
1.27878e-07	0.283552	0.275	0.208	0.00238403	EC1	Tjp1
0	2.40396	0.996	0.059	0	EC2	Pecam1
0	2.39879	0.955	0.075	0	EC2	Ctla2a
0	2.33065	0.893	0.08	0	EC2	Lrg1
0	2.27936	0.617	0.071	0	EC2	Aqp1
0	2.26512	0.905	0.042	0	EC2	Plvap
0	2.25718	0.913	0.037	0	EC2	Vwf
0	2.24062	0.982	0.035	0	EC2	Ptprb
0	2.15682	0.99	0.077	0	EC2	Cdh5
0	2.14663	0.638	0.034	0	EC2	Cldn5
0	2.08132	0.98	0.063	0	EC2	Egfl7
0	2.03401	0.982	0.121	0	EC2	Eng
0	1.94238	0.988	0.072	0	EC2	Esam
0	1.9393	0.972	0.056	0	EC2	Flt1
0	1.93225	0.98	0.029	0	EC2	Mmrn2
0	1.77691	0.986	0.266	0	EC2	Ece1
0	1.77566	0.854	0.05	0	EC2	Clu
0	1.7675	0.711	0.028	0	EC2	Aplnr
0	1.72688	0.925	0.048	0	EC2	Podxl
0	1.71976	0.737	0.083	0	EC2	Slco2a1
0	1.69531	0.974	0.054	0	EC2	Adgrf5
0	1.68192	0.964	0.108	0	EC2	Epas1
0	1.64753	0.974	0.113	0	EC2	Ramp2
0	1.58166	0.945	0.169	0	EC2	Entpd1
0	1.5669	0.955	0.108	0	EC2	Cavin2
0	1.54426	0.957	0.041	0	EC2	Rasip1
0	1.54062	0.939	0.085	0	EC2	Ecscr
0	1.53786	0.927	0.064	0	EC2	Tspan7
0	1.50934	0.903	0.063	0	EC2	Emcn
0	1.49129	0.899	0.118	0	EC2	Ly6c1
0	1.47968	0.816	0.019	0	EC2	Tmem252
0	1.46531	0.953	0.207	0	EC2	Heg1
0	1.46297	0.781	0.099	0	EC2	Eln
0	1.45696	0.929	0.21	0	EC2	Id3
0	1.45388	0.905	0.034	0	EC2	Kdr
0	1.44738	0.937	0.097	0	EC2	Sorbs2
0	1.42475	0.941	0.136	0	EC2	Cd200
0	1.42377	0.929	0.028	0	EC2	Tie1
0	1.41749	0.883	0.052	0	EC2	C130074G19Rik
0	1.4133	0.915	0.043	0	EC2	Cyyr1
0	1.40947	0.964	0.289	0	EC2	Col4a2
0	1.39205	0.506	0.022	0	EC2	Selp
0	1.37031	0.927	0.09	0	EC2	S1pr1
0	1.36725	0.879	0.028	0	EC2	Sox18
0	1.34642	0.97	0.214	0	EC2	Cd34
0	1.34257	0.816	0.142	0	EC2	Scarb1
0	1.33871	0.84	0.026	0	EC2	Grrp1
0	1.33782	0.893	0.06	0	EC2	Prex2
0	1.2826	0.899	0.104	0	EC2	Abcg2
0	1.27952	0.731	0.043	0	EC2	Id1
0	1.27922	0.949	0.235	0	EC2	Crip2
0	1.26629	0.868	0.025	0	EC2	Adgrl4
0	1.24243	0.789	0.108	0	EC2	Ltbp4
0	1.22614	0.749	0.117	0	EC2	Slc9a3r2
0	1.20898	0.83	0.127	0	EC2	Calcrl
0	1.20426	0.435	0.019	0	EC2	Ackr1
0	1.19316	0.846	0.089	0	EC2	Jam2
0	1.19117	0.814	0.156	0	EC2	Insr
0	1.18885	0.895	0.032	0	EC2	Tek
0	1.18184	0.901	0.127	0	EC2	Crim1
0	1.17146	0.893	0.024	0	EC2	Tmem88
0	1.16838	0.919	0.236	0	EC2	Gng11
0	1.14995	0.445	0.021	0	EC2	Stmn2
0	1.14567	0.372	0.029	0	EC2	Sema3g
0	1.12775	0.897	0.178	0	EC2	Ets1
0	1.12438	0.846	0.022	0	EC2	Myct1
0	1.10841	0.804	0.109	0	EC2	Adamts9
0	1.10478	0.808	0.071	0	EC2	Tinagl1
0	1.09304	0.897	0.188	0	EC2	Tjp1
0	1.09211	0.698	0.05	0	EC2	Rflnb
0	1.07066	0.806	0.029	0	EC2	Clec14a
0	1.06568	0.899	0.15	0	EC2	Tspan13
0	1.06054	0.919	0.237	0	EC2	Tgm2
0	1.05911	0.787	0.016	0	EC2	Mecom
0	1.0578	0.791	0.099	0	EC2	Mast4
0	1.05245	0.858	0.077	0	EC2	Ace
0	1.04279	0.749	0.041	0	EC2	Abcb1a
0	1.04079	0.765	0.111	0	EC2	Csf2rb2
0	1.03816	0.868	0.128	0	EC2	Ablim1
0	1.02222	0.83	0.031	0	EC2	Spns2
0	1.02052	0.917	0.131	0	EC2	F11r
0	1.01121	0.652	0.019	0	EC2	Sox17
0	1.00001	0.858	0.152	0	EC2	Apbb2
1.5489e-306	1.3954	0.897	0.225	2.88761e-302	EC2	Col18a1
8.957e-304	0.998375	0.885	0.202	1.66985e-299	EC2	Sparcl1
3.45304e-299	1.44359	0.978	0.387	6.4375e-295	EC2	Cd93
3.87243e-292	1.13481	0.607	0.098	7.21936e-288	EC2	Fbln5
1.21524e-286	1.20945	0.962	0.316	2.26558e-282	EC2	Cav1
2.2593e-284	1.25368	0.986	0.427	4.21202e-280	EC2	Nfib
3.38451e-266	1.41952	0.98	0.396	6.30974e-262	EC2	Tm4sf1
8.07415e-257	1.44724	0.974	0.472	1.50526e-252	EC2	Col4a1
1.20199e-256	1.87524	0.968	0.561	2.24087e-252	EC2	Igfbp7
1.08452e-244	1.21384	0.99	0.703	2.02188e-240	EC2	Tcf4
3.48991e-240	1.11839	0.992	0.848	6.50624e-236	EC2	Myh9
1.20615e-235	1.14424	0.887	0.279	2.24862e-231	EC2	Ly6a
1.03632e-226	1.36516	0.953	0.56	1.93201e-222	EC2	Ehd4
4.71724e-222	1.03135	0.998	0.793	8.79435e-218	EC2	Sptbn1
4.94758e-191	1.00301	0.747	0.254	9.22377e-187	EC2	Nrp2
2.22211e-172	1.52364	0.532	0.124	4.14268e-168	EC2	Mal
1.48376e-120	1.90472	0.415	0.105	2.76617e-116	EC2	Fabp4
2.66749e-54	1.34827	0.739	0.543	4.97301e-50	EC2	Glul
0	2.14742	0.967	0.054	0	EC3	Kdr
0	2.10197	0.95	0.068	0	EC3	Podxl
0	1.95694	0.958	0.058	0	EC3	Ptprb
0	1.92247	0.792	0.044	0	EC3	Aplnr
0	1.90426	0.967	0.044	0	EC3	Adgrl4
0	1.64503	0.95	0.064	0	EC3	Cyyr1
0	1.60836	0.858	0.014	0	EC3	Gpihbp1
0	1.4949	0.892	0.053	0	EC3	Mmrn2
0	1.42183	0.942	0.049	0	EC3	Tie1
0	1.14667	0.742	0.028	0	EC3	Pcdh17
0	1.13829	0.817	0.042	0	EC3	Myct1
0	1.13225	0.817	0.049	0	EC3	Galnt15
0	1.08783	0.7	0.012	0	EC3	Clic5
0	1.0684	0.8	0.037	0	EC3	Arhgef15
0	1.05969	0.683	0.019	0	EC3	C1qtnf9
0	1.05066	0.508	0.003	0	EC3	Btnl9
[truncated: 334 more rows]
